# Supplementary material
Source: publisher site journal article supplement (https://www.spandidos-publications.com/2491/downloadSupplementary)
Supplement: Supplementary file 1 [file downloadSupplementary]

## Sheet: uniCoxResult.Sig显著的，补充表格
Table SI. Each alternative splicing event with z-score, HR and P-value analyzed by univariate Cox regression analysis. HR, hazard ratio; AA, alternate acceptor; AD, alternate donor; AP, alternate promoter; AT, alternate terminator; ES, exon skipping; ME, mutually exclusive exon; RI, retained intron.
ID	z-score	Hazard ratio	HR	Low values of the 95% CI	low values of the 95% CI	High values of the 95% CI	high values of the 95% CI	P-value	P-value
HSD11B1L|46873|ES	4.03379	4.768*10^1	47.678	7.292*10^0	7.29199	3.117*10^2	311.738	5.488*10^-5	5.48845e-05
CNN1|47723|AP	-3.96607	6.150*10^-8	6.15033e-08	1.680*10^-11	1.67994e-11	2.252*10^-4	0.000225167	7.307*10^-5	7.30684e-05
CDH11|36699|ES	3.93245	2.702*10^12	2.70174e+12	1.720*10^6	1.72033e+06	4.243*10^18	4.24301e+18	8.408*10^-5	8.40848e-05
DST|76557|AT	-3.90478	2.852*10^-9	2.85199e-09	1.466*10^-13	1.46603e-13	5.548*10^-5	5.5482e-05	9.431*10^-5	9.43125e-05
TMEM63B|76352|AP	3.89145	5.130*10^1	51.2979	7.060*10^0	7.05979	3.727*10^2	372.741	9.965*10^-5	9.96477e-05
ZNF302|48995|AD	-3.83772	1.293*10^-2	0.0129274	1.403*10^-3	0.00140294	1.191*10^-1	0.119119	1.242*10^-4	0.000124181
FAM86B1|82719|AD	-3.69415	2.506*10^-2	0.0250639	3.545*10^-3	0.00354528	1.772*10^-1	0.177193	2.206*10^-4	0.000220622
MRPS28|127358|ES	3.65676	1.808*10^1	18.0765	3.831*10^0	3.83109	8.529*10^1	85.2913	2.554*10^-4	0.000255419
SYNE1|78181|AT	-3.60432	3.219*10^-3	0.0032192	1.421*10^-4	0.00014207	7.294*10^-2	0.0729442	3.130*10^-4	0.000312976
MRPL55|10069|ES	-3.52774	3.223*10^-14	3.22318e-14	1.029*10^-21	1.02914e-21	1.009*10^-6	1.00947e-06	4.191*10^-4	0.000419121
IGF2BP2|68031|ES	3.50792	1.711*10^1	17.1055	3.501*10^0	3.50068	8.358*10^1	83.5835	4.516*10^-4	0.000451623
BRSK2|13845|ES	3.50685	2.419*10^3	2418.74	3.108*10^1	31.0825	1.882*10^5	188218	4.534*10^-4	0.000453441
GSG1L|35696|AP	-3.49018	2.644*10^-1	0.264356	1.252*10^-1	0.12523	5.580*10^-1	0.558043	4.827*10^-4	0.000482698
GSG1L|35698|AP	3.46328	3.726*10^0	3.72633	1.770*10^0	1.77002	7.845*10^0	7.84486	5.336*10^-4	0.000533633
HDAC9|78886|AP	3.45569	5.887*10^0	5.88677	2.154*10^0	2.1539	1.609*10^1	16.0889	5.489*10^-4	0.000548879
NKIRAS2|40976|AP	-3.42138	1.602*10^-7	1.6019e-07	2.050*10^-11	2.05047e-11	1.251*10^-3	0.00125146	6.230*10^-4	0.00062305
NKIRAS2|40977|AP	3.42138	6.243*10^6	6.2426e+06	7.991*10^2	799.068	4.877*10^10	4.87693e+10	6.230*10^-4	0.00062305
PPAPDC1A|13279|AP	-3.36504	5.275*10^-4	0.000527453	6.502*10^-6	6.50167e-06	4.279*10^-2	0.0427901	7.653*10^-4	0.000765321
PRSS36|94149|ES	3.36448	7.641*10^0	7.64064	2.337*10^0	2.33704	2.498*10^1	24.98	7.669*10^-4	0.000766867
AIFM2|12029|AT	-3.362	4.927*10^-5	4.92683e-05	1.519*10^-7	1.51858e-07	1.598*10^-2	0.0159844	7.738*10^-4	0.000773805
AIFM2|12030|AT	3.36194	2.029*10^4	20292.2	6.255*10^1	62.5482	6.583*10^6	6.58328e+06	7.740*10^-4	0.000773976
USP25|60221|ES	-3.35587	8.350*10^-4	0.000835046	1.330*10^-5	1.33005e-05	5.243*10^-2	0.0524268	7.911*10^-4	0.000791144
ZNF280D|30765|AP	3.344	3.397*10^2	339.689	1.116*10^1	11.1578	1.034*10^4	10341.5	8.258*10^-4	0.000825798
ZNF280D|30767|AP	-3.33035	3.039*10^-3	0.00303903	1.003*10^-4	0.000100296	9.208*10^-2	0.0920847	8.674*10^-4	0.000867383
WDR11|13290|ES	-3.32953	6.643*10^-8	6.64271e-08	3.955*10^-12	3.95492e-12	1.116*10^-3	0.00111572	8.699*10^-4	0.000869936
CRYAB|18698|RI	-3.3181	5.808*10^-5	5.80823e-05	1.828*10^-7	1.82773e-07	1.846*10^-2	0.0184577	9.063*10^-4	0.000906326
TMUB2|41809|ES	-3.31445	7.808*10^-2	0.0780758	1.728*10^-2	0.017283	3.527*10^-1	0.352707	9.182*10^-4	0.00091822
DDAH1|3657|AP	3.29426	3.814*10^1	38.1388	4.370*10^0	4.37032	3.328*10^2	332.829	9.868*10^-4	0.000986796
HAT1|55964|ES	-3.28735	2.918*10^-8	2.91752e-08	9.387*10^-13	9.38741e-13	9.067*10^-4	0.000906738	1.011*10^-3	0.00101136
CCAR1|11956|ES	3.27832	3.046*10^4	30456.3	6.355*10^1	63.5453	1.460*10^7	1.45973e+07	1.044*10^-3	0.00104427
COA6|10337|RI	-3.27199	5.267*10^-2	0.0526732	9.032*10^-3	0.00903245	3.072*10^-1	0.307167	1.068*10^-3	0.00106794
TMEM63B|76351|AP	-3.27188	3.332*10^-2	0.0333218	4.343*10^-3	0.00434303	2.557*10^-1	0.25566	1.068*10^-3	0.00106836
ARPP19|30672|ES	-3.26725	5.745*10^-4	0.000574545	6.536*10^-6	6.53587e-06	5.051*10^-2	0.0505062	1.086*10^-3	0.00108597
C19orf53|47935|AP	3.25369	2.761*10^2	276.148	9.346*10^0	9.34633	8.159*10^3	8159.09	1.139*10^-3	0.00113917
C19orf53|47934|AP	-3.25369	3.621*10^-3	0.00362125	1.226*10^-4	0.000122563	1.070*10^-1	0.106994	1.139*10^-3	0.00113917
GUF1|69147|ES	-3.25159	3.820*10^-2	0.0381993	5.338*10^-3	0.00533777	2.734*10^-1	0.27337	1.148*10^-3	0.00114761
ARPP21|63903|AP	3.23375	2.661*10^1	26.6055	3.642*10^0	3.64167	1.944*10^2	194.375	1.222*10^-3	0.00122177
KLHL12|9424|ES	-3.23116	1.972*10^-10	1.97245e-10	2.559*10^-16	2.55938e-16	1.520*10^-4	0.000152012	1.233*10^-3	0.00123288
MRPS21|7461|AP	-3.22605	5.994*10^-2	0.059935	1.084*10^-2	0.010841	3.314*10^-1	0.331353	1.255*10^-3	0.0012551
MRPS21|7460|AP	3.22603	1.668*10^1	16.6843	3.018*10^0	3.01786	9.224*10^1	92.24	1.255*10^-3	0.00125522
MAT2B|74448|AP	-3.20482	1.749*10^-2	0.0174905	1.473*10^-3	0.00147283	2.077*10^-1	0.207706	1.351*10^-3	0.00135149
MAT2B|74449|AP	3.20465	5.716*10^1	57.1561	4.813*10^0	4.81329	6.787*10^2	678.708	1.352*10^-3	0.00135228
AASDH|69344|ES	3.20034	5.258*10^1	52.5839	4.645*10^0	4.64475	5.953*10^2	595.311	1.373*10^-3	0.00137265
PLCD1|64009|AP	3.1996	4.986*10^0	4.9864	1.864*10^0	1.86358	1.334*10^1	13.3422	1.376*10^-3	0.00137617
PLCD1|64008|AP	-3.19791	2.008*10^-1	0.200828	7.508*10^-2	0.0750815	5.372*10^-1	0.537175	1.384*10^-3	0.00138428
FYN|77269|AP	-3.17766	6.467*10^-6	6.46736e-06	4.074*10^-9	4.07394e-09	1.027*10^-2	0.0102669	1.485*10^-3	0.00148467
DDAH1|3656|AP	-3.17532	5.095*10^-2	0.0509522	8.113*10^-3	0.0081126	3.200*10^-1	0.320012	1.497*10^-3	0.00149671
ISCU|24228|RI	-3.15709	1.798*10^-1	0.179794	6.196*10^-2	0.0619624	5.217*10^-1	0.521699	1.594*10^-3	0.00159352
CLIC5|76410|AT	-3.14066	1.392*10^-1	0.139154	4.064*10^-2	0.0406431	4.764*10^-1	0.476439	1.686*10^-3	0.00168568
C14orf2|29531|ES	3.13307	4.532*10^0	4.53213	1.761*10^0	1.76091	1.166*10^1	11.6645	1.730*10^-3	0.00172988
MEF2A|32714|AP	3.12923	2.257*10^1	22.5663	3.204*10^0	3.20429	1.589*10^2	158.924	1.753*10^-3	0.00175267
OBSL1|57730|AT	3.12427	1.488*10^3	1487.59	1.522*10^1	15.2151	1.454*10^5	145443	1.782*10^-3	0.00178246
FYN|124660|ES	-3.12205	3.172*10^-2	0.0317187	3.635*10^-3	0.00363471	2.768*10^-1	0.276797	1.796*10^-3	0.00179596
PPIL3|95736|ES	3.11756	6.383*10^0	6.38318	1.990*10^0	1.99032	2.047*10^1	20.4716	1.824*10^-3	0.00182354
MS4A6A|16057|RI	-3.11733	1.639*10^-3	0.00163899	2.906*10^-5	2.90598e-05	9.244*10^-2	0.0924405	1.825*10^-3	0.00182499
RMDN1|84375|ES	-3.11632	6.645*10^-6	6.64535e-06	3.683*10^-9	3.68316e-09	1.199*10^-2	0.0119899	1.831*10^-3	0.0018312
ATG12|73034|ES	-3.11026	1.104*10^-1	0.110406	2.754*10^-2	0.0275374	4.427*10^-1	0.44265	1.869*10^-3	0.00186922
TGIF1|44497|AP	3.10846	1.700*10^1	16.9969	2.848*10^0	2.84832	1.014*10^2	101.426	1.881*10^-3	0.00188067
PCBP4|100544|ES	3.10572	1.130*10^1	11.304	2.447*10^0	2.44656	5.223*10^1	52.2289	1.898*10^-3	0.00189819
RWDD1|77328|ES	-3.10411	9.025*10^-3	0.00902548	4.619*10^-4	0.000461888	1.764*10^-1	0.176362	1.909*10^-3	0.0019085
C11orf73|18188|ES	3.09844	5.831*10^9	5.83107e+09	3.875*10^3	3875.06	8.774*10^15	8774403213892380	1.945*10^-3	0.00194543
RPL39L|68071|AP	3.09467	4.850*10^0	4.85009	1.784*10^0	1.78418	1.318*10^1	13.1844	1.970*10^-3	0.00197034
RPL39L|68070|AP	-3.09463	2.062*10^-1	0.206187	7.585*10^-2	0.0758496	5.605*10^-1	0.560492	1.971*10^-3	0.00197059
GDA|86591|RI	-3.08495	5.646*10^-6	5.64635e-06	2.615*10^-9	2.61461e-09	1.219*10^-2	0.0121935	2.036*10^-3	0.00203584
NFATC3|37188|ES	3.07731	1.367*10^5	136729	7.325*10^1	73.2476	2.552*10^8	2.55229e+08	2.089*10^-3	0.00208875
DCUN1D4|69276|ES	-3.05581	2.961*10^-3	0.00296116	7.074*10^-5	7.07431e-05	1.239*10^-1	0.123948	2.245*10^-3	0.00224453
SERPINB6|75151|AD	3.05275	1.699*10^3	1698.66	1.433*10^1	14.331	2.013*10^5	201344	2.268*10^-3	0.00226753
UBXN11|101231|ES	3.05119	7.550*10^0	7.55029	2.061*10^0	2.0606	2.767*10^1	27.6651	2.279*10^-3	0.00227936
CC2D2A|68808|ES	-3.04491	5.558*10^-6	5.55824e-06	2.303*10^-9	2.30319e-09	1.341*10^-2	0.0134136	2.328*10^-3	0.0023275
RPS23|72688|AT	-3.0402	1.064*10^-2	0.0106413	5.689*10^-4	0.000568898	1.990*10^-1	0.199048	2.364*10^-3	0.00236421
FBXL19|36205|AD	-3.03401	5.032*10^-2	0.0503203	7.296*10^-3	0.00729579	3.471*10^-1	0.347067	2.413*10^-3	0.00241325
C19orf44|48173|ES	3.02919	1.948*10^1	19.4823	2.852*10^0	2.8524	1.331*10^2	133.068	2.452*10^-3	0.00245211
DYRK3|9590|AP	-3.02784	2.110*10^-5	2.11018e-05	1.985*10^-8	1.98467e-08	2.244*10^-2	0.0224363	2.463*10^-3	0.00246306
CIZ1|87718|ES	-3.02604	6.603*10^-6	6.60312e-06	2.914*10^-9	2.91409e-09	1.496*10^-2	0.0149622	2.478*10^-3	0.00247781
HNRNPH1|74906|AD	-3.02357	6.865*10^-6	6.86454e-06	3.087*10^-9	3.08714e-09	1.526*10^-2	0.0152639	2.498*10^-3	0.00249811
CLIC5|76411|AT	3.02092	7.142*10^0	7.14207	1.995*10^0	1.99465	2.557*10^1	25.573	2.520*10^-3	0.00252004
BDH1|68298|AP	3.01942	1.932*10^1	19.3244	2.827*10^0	2.82663	1.321*10^2	132.113	2.533*10^-3	0.0025326
FOXRED1|19375|ES	3.0173	6.226*10^2	622.631	9.532*10^0	9.53162	4.067*10^4	40671.9	2.550*10^-3	0.00255037
RNF7|67078|ES	-3.01234	7.070*10^-2	0.0707024	1.261*10^-2	0.0126132	3.963*10^-1	0.396319	2.592*10^-3	0.00259245
BDH1|68297|AP	-3.00716	5.281*10^-2	0.0528137	7.767*10^-3	0.00776742	3.591*10^-1	0.359101	2.637*10^-3	0.002637
ROBO2|65640|AP	3.00714	5.941*10^0	5.94145	1.860*10^0	1.85991	1.898*10^1	18.9798	2.637*10^-3	0.00263718
CLCN5|89131|AT	-3.00644	4.600*10^-5	4.59962e-05	6.842*10^-8	6.84155e-08	3.092*10^-2	0.0309236	2.643*10^-3	0.00264328
ERC1|19658|ES	3.00481	1.375*10^1	13.7513	2.488*10^0	2.48788	7.601*10^1	76.0081	2.658*10^-3	0.0026575
USP19|64840|AA	-3.00291	2.993*10^-2	0.0299285	3.030*10^-3	0.00303001	2.956*10^-1	0.295615	2.674*10^-3	0.00267411
CD200|66101|ES	-2.99938	5.082*10^-2	0.050821	7.253*10^-3	0.00725268	3.561*10^-1	0.356113	2.705*10^-3	0.0027053
RPS6KA1|1286|AA	-2.9929	7.527*10^-10	7.52719e-10	7.980*10^-16	7.97998e-16	7.100*10^-4	0.000710008	2.763*10^-3	0.0027634
POLI|45581|AA	-2.99188	3.746*10^-8	3.74618e-08	5.112*10^-13	5.11196e-13	2.745*10^-3	0.0027453	2.773*10^-3	0.00277265
FAM195A|32926|ES	2.98574	5.608*10^5	560790	9.442*10^1	94.4156	3.331*10^9	3.33086e+09	2.829*10^-3	0.00282896
CCDC40|44016|AT	2.98393	6.822*10^1	68.2187	4.259*10^0	4.25915	1.093*10^3	1092.66	2.846*10^-3	0.00284571
C19orf57|47943|ES	2.9835	1.230*10^1	12.2969	2.365*10^0	2.36522	6.393*10^1	63.932	2.850*10^-3	0.00284971
CSPG5|64534|AD	-2.98205	5.243*10^-3	0.00524251	1.662*10^-4	0.000166226	1.653*10^-1	0.165341	2.863*10^-3	0.00286322
FAM186A|21698|AT	-2.98052	7.230*10^-11	7.22963e-11	1.551*10^-17	1.55081e-17	3.370*10^-4	0.000337035	2.878*10^-3	0.0028776
TMUB2|41811|AD	-2.97788	8.033*10^-2	0.0803338	1.528*10^-2	0.0152802	4.223*10^-1	0.422344	2.903*10^-3	0.0029025
PPOX|8581|ES	2.97738	4.109*10^9	4.10867e+09	1.928*10^3	1928.21	8.755*10^15	8754808491961470	2.907*10^-3	0.0029072
FIGN|55777|AT	-2.97608	1.820*10^-4	0.000182016	6.268*10^-7	6.26792e-07	5.286*10^-2	0.0528564	2.920*10^-3	0.00291958
CMIP|37767|AP	-2.97464	6.045*10^-6	6.04515e-06	2.203*10^-9	2.20254e-09	1.659*10^-2	0.0165917	2.933*10^-3	0.00293331
CBLL1|81372|ES	2.97098	7.112*10^1	71.1209	4.268*10^0	4.26806	1.185*10^3	1185.13	2.968*10^-3	0.00296849
NAGLU|41057|ES	2.96699	2.037*10^4	20368.3	2.901*10^1	29.0068	1.430*10^7	1.43025e+07	3.007*10^-3	0.00300734
C11orf49|15610|RI	-2.96161	1.455*10^-2	0.0145472	8.850*10^-4	0.000884959	2.391*10^-1	0.23913	3.060*10^-3	0.00306038
DEPDC1B|72155|ES	-2.95959	2.859*10^-3	0.00285937	5.912*10^-5	5.91165e-05	1.383*10^-1	0.138303	3.080*10^-3	0.00308045
FAM195A|32925|ES	2.95817	4.436*10^4	44360.5	3.699*10^1	36.9899	5.320*10^7	5.31998e+07	3.095*10^-3	0.00309473
RPS11|50954|ES	2.95611	8.473*10^0	8.47287	2.055*10^0	2.05459	3.494*10^1	34.941	3.115*10^-3	0.00311549
CCDC90B|18083|AD	-2.95472	1.311*10^-2	0.0131054	7.391*10^-4	0.000739088	2.324*10^-1	0.232384	3.129*10^-3	0.00312948
DENND2A|82009|AT	2.95041	1.843*10^8	1.84287e+08	5.953*10^2	595.255	5.705*10^13	5.70537e+13	3.174*10^-3	0.00317355
EIF3B|78612|AA	2.94126	1.764*10^3	1764.17	1.211*10^1	12.1101	2.570*10^5	257000	3.269*10^-3	0.00326877
CHTF18|33022|AD	-2.94083	1.402*10^-2	0.0140247	8.163*10^-4	0.000816316	2.410*10^-1	0.240951	3.273*10^-3	0.00327339
HAT1|55960|AT	2.93876	4.316*10^20	4.31557e+20	7.461*10^6	7.46105e+06	2.496*10^34	2.49618e+34	3.295*10^-3	0.00329527
ST3GAL4|19394|AP	2.93745	1.137*10^1	11.3743	2.246*10^0	2.24583	5.761*10^1	57.6067	3.309*10^-3	0.00330921
BRD7|36379|AA	-2.93738	3.567*10^-3	0.00356728	8.301*10^-5	8.30113e-05	1.533*10^-1	0.153299	3.310*10^-3	0.00330999
TNFSF13B|26241|ES	-2.93562	3.637*10^-4	0.000363683	1.839*10^-6	1.83861e-06	7.194*10^-2	0.0719376	3.329*10^-3	0.00332886
ERCC5|26230|RI	-2.93449	5.338*10^-3	0.00533823	1.620*10^-4	0.000161999	1.759*10^-1	0.175907	3.341*10^-3	0.00334097
MTMR11|7415|ES	-2.9296	1.682*10^-5	1.68197e-05	1.076*10^-8	1.07595e-08	2.629*10^-2	0.0262931	3.394*10^-3	0.00339395
CDKL3|73367|AT	2.92931	2.811*10^1	28.1079	3.016*10^0	3.01603	2.620*10^2	261.952	3.397*10^-3	0.00339718
ROBO2|65641|AP	-2.92249	1.749*10^-1	0.174904	5.432*10^-2	0.054323	5.631*10^-1	0.563137	3.472*10^-3	0.00347241
FAM13A|69905|AT	-2.916	1.408*10^-2	0.0140826	8.023*10^-4	0.0008023	2.472*10^-1	0.247188	3.545*10^-3	0.00354546
MTCH1|76000|AD	-2.91566	1.111*10^-2	0.0111068	5.393*10^-4	0.000539257	2.288*10^-1	0.228762	3.549*10^-3	0.00354941
SLAIN1|26091|AP	-2.91289	1.679*10^-3	0.00167932	2.281*10^-5	2.28056e-05	1.237*10^-1	0.123659	3.581*10^-3	0.00358097
CSGALNACT2|11318|AT	2.91199	3.279*10^8	3.27858e+08	6.082*10^2	608.221	1.767*10^14	176729964439414	3.591*10^-3	0.00359133
LUC7L|32846|RI	-2.9022	1.326*10^-1	0.132621	3.389*10^-2	0.0338905	5.190*10^-1	0.518974	3.706*10^-3	0.00370556
SLC45A4|85333|RI	-2.89971	1.084*10^-1	0.108435	2.416*10^-2	0.0241562	4.868*10^-1	0.48676	3.735*10^-3	0.00373502
FAM193B|74803|AA	-2.89895	9.684*10^-4	0.000968441	8.879*10^-6	8.87924e-06	1.056*10^-1	0.105626	3.744*10^-3	0.00374411
SETD6|36663|AA	-2.89123	4.836*10^-2	0.0483551	6.203*10^-3	0.00620335	3.769*10^-1	0.376927	3.837*10^-3	0.00383735
U2AF1L4|49275|ES	2.89021	7.492*10^0	7.49154	1.912*10^0	1.91201	2.935*10^1	29.353	3.850*10^-3	0.00384989
BCCIP|13432|AT	-2.88662	9.460*10^-3	0.00946012	3.995*10^-4	0.000399544	2.240*10^-1	0.22399	3.894*10^-3	0.00389409
GMPPB|64913|RI	-2.88101	5.843*10^-7	5.8428e-07	3.358*10^-11	3.35756e-11	1.017*10^-2	0.0101676	3.964*10^-3	0.00396404
MDM2|22969|ES	-2.87911	3.306*10^-11	3.30577e-11	2.424*10^-18	2.42374e-18	4.509*10^-4	0.000450878	3.988*10^-3	0.00398797
SNX15|16731|AD	-2.87694	2.944*10^-5	2.94429e-05	2.411*10^-8	2.41069e-08	3.596*10^-2	0.0359599	4.016*10^-3	0.00401558
ITGA9|63999|AT	-2.87651	8.567*10^-7	8.56653e-07	6.292*10^-11	6.29236e-11	1.166*10^-2	0.0116626	4.021*10^-3	0.00402095
FAM135A|76643|ES	-2.87405	1.396*10^-3	0.00139565	1.576*10^-5	1.57635e-05	1.236*10^-1	0.123566	4.052*10^-3	0.00405239
GLRX3|13476|ES	2.8735	9.857*10^1	98.569	4.304*10^0	4.30374	2.258*10^3	2257.53	4.059*10^-3	0.00405947
HNF1A|24784|AT	-2.87203	1.203*10^-2	0.0120329	5.893*10^-4	0.000589326	2.457*10^-1	0.24569	4.078*10^-3	0.00407848
HNF1A|24782|AT	2.87203	8.311*10^1	83.1052	4.070*10^0	4.07016	1.697*10^3	1696.85	4.078*10^-3	0.00407848
CPEB4|74594|ES	2.86588	1.443*10^1	14.433	2.325*10^0	2.32529	8.959*10^1	89.5855	4.159*10^-3	0.00415852
ZNF138|115222|ES	2.86301	5.209*10^0	5.20896	1.683*10^0	1.68297	1.612*10^1	16.1222	4.196*10^-3	0.00419633
FAM122B|90157|AA	-2.86242	1.607*10^-2	0.0160749	9.503*10^-4	0.000950293	2.719*10^-1	0.27192	4.204*10^-3	0.00420424
HOPX|69370|RI	2.86093	7.191*10^0	7.19066	1.861*10^0	1.86129	2.778*10^1	27.7794	4.224*10^-3	0.00422405
FLAD1|7868|ES	2.85221	1.436*10^3	1436.36	9.720*10^0	9.72021	2.123*10^5	212252	4.342*10^-3	0.00434163
RCAN2|76416|AP	-2.85078	1.566*10^-2	0.0156601	8.988*10^-4	0.00089884	2.728*10^-1	0.272838	4.361*10^-3	0.00436115
ZNF530|207512|ES	-2.85024	3.536*10^-2	0.0353637	3.552*10^-3	0.00355202	3.521*10^-1	0.352078	4.369*10^-3	0.0043686
MPPE1|44650|ES	-2.85014	9.373*10^-2	0.0937255	1.840*10^-2	0.0184006	4.774*10^-1	0.477401	4.370*10^-3	0.00437002
SCARB2|69595|ES	-2.84766	5.884*10^-2	0.0588449	8.374*10^-3	0.008374	4.135*10^-1	0.413509	4.404*10^-3	0.00440425
NAA38|81579|RI	-2.84238	5.896*10^-5	5.89636e-05	7.148*10^-8	7.1481e-08	4.864*10^-2	0.0486382	4.478*10^-3	0.00447778
MFSD8|70556|ES	-2.83908	2.767*10^-2	0.027669	2.325*10^-3	0.00232498	3.293*10^-1	0.329281	4.524*10^-3	0.00452442
PAX6|14834|AD	-2.83279	5.331*10^-2	0.0533132	7.014*10^-3	0.00701377	4.052*10^-1	0.405245	4.614*10^-3	0.00461433
NPRL3|32807|ES	2.83215	4.087*10^2	408.717	6.371*10^0	6.37108	2.622*10^4	26220	4.624*10^-3	0.00462357
TBRG4|79588|AD	2.83148	4.921*10^2	492.136	6.739*10^0	6.73923	3.594*10^4	35938.5	4.633*10^-3	0.00463332
HSCB|61550|ES	2.83125	2.714*10^1	27.1425	2.762*10^0	2.76179	2.668*10^2	266.752	4.637*10^-3	0.00463661
PRKRA|56163|RI	-2.83084	1.581*10^-3	0.00158114	1.818*10^-5	1.81823e-05	1.375*10^-1	0.137497	4.643*10^-3	0.00464255
LRRC29|36979|AP	-2.8306	2.201*10^-1	0.220146	7.720*10^-2	0.0771951	6.278*10^-1	0.627813	4.646*10^-3	0.00464606
HNRNPA2B1|79037|ES	2.82415	9.611*10^0	9.61067	1.999*10^0	1.99858	4.622*10^1	46.2154	4.741*10^-3	0.00474064
CSAD|21951|AA	-2.82354	6.451*10^-11	6.4513e-11	5.445*10^-18	5.44491e-18	7.644*10^-4	0.000764369	4.750*10^-3	0.00474971
TRIP12|57850|ES	2.82316	1.132*10^8	1.13207e+08	2.901*10^2	290.077	4.418*10^13	44180926834773	4.755*10^-3	0.00475529
PSMD4|7584|AD	2.82306	1.603*10^10	1.60253e+10	1.318*10^3	1318	1.948*10^17	1.94848e+17	4.757*10^-3	0.00475681
DUS4L|81344|ES	2.8223	5.567*10^0	5.56718	1.690*10^0	1.68975	1.834*10^1	18.342	4.768*10^-3	0.00476812
OSBPL1A|44880|AT	-2.81998	1.245*10^-5	1.24548e-05	4.858*10^-9	4.85798e-09	3.193*10^-2	0.0319313	4.803*10^-3	0.0048027
ST3GAL4|19391|AP	-2.81992	1.079*10^-1	0.107938	2.297*10^-2	0.0229716	5.072*10^-1	0.507178	4.804*10^-3	0.00480359
ACADVL|38852|ES	-2.81679	2.419*10^-2	0.0241943	1.816*10^-3	0.00181583	3.224*10^-1	0.322367	4.851*10^-3	0.00485069
CPNE5|75991|AP	-2.81629	1.274*10^-2	0.0127372	6.114*10^-4	0.000611396	2.654*10^-1	0.265353	4.858*10^-3	0.00485812
SERGEF|14562|AD	2.8111	8.663*10^0	8.66288	1.923*10^0	1.92266	3.903*10^1	39.032	4.937*10^-3	0.00493718
NAP1L1|23488|ES	-2.81086	1.299*10^-5	1.29918e-05	5.088*10^-9	5.08762e-09	3.318*10^-2	0.0331761	4.941*10^-3	0.00494095
RPE|100824|ME	-2.80956	2.055*10^-1	0.205457	6.812*10^-2	0.0681196	6.197*10^-1	0.619686	4.961*10^-3	0.00496099
PCSK7|92829|ES	2.80942	1.047*10^4	10467.1	1.642*10^1	16.4224	6.671*10^6	6.67139e+06	4.963*10^-3	0.00496306
ACOT9|88691|AT	-2.80901	3.913*10^-4	0.000391266	1.640*10^-6	1.6402e-06	9.334*10^-2	0.0933354	4.969*10^-3	0.0049694
ACOT9|88692|AT	2.80901	2.556*10^3	2555.81	1.071*10^1	10.714	6.097*10^5	609681	4.969*10^-3	0.0049694
CHD4|19897|AA	-2.80646	6.371*10^-2	0.0637123	9.314*10^-3	0.00931366	4.358*10^-1	0.435839	5.009*10^-3	0.00500896
COX11|42567|RI	2.80096	6.956*10^0	6.95631	1.790*10^0	1.7903	2.703*10^1	27.0291	5.095*10^-3	0.00509512
POMGNT1|2784|RI	-2.80004	5.721*10^-9	5.72126e-09	9.726*10^-15	9.72573e-15	3.366*10^-3	0.00336559	5.110*10^-3	0.00510964
CLEC16A|34007|ES	2.7988	4.285*10^1	42.8528	3.084*10^0	3.08407	5.954*10^2	595.436	5.129*10^-3	0.00512933
CMC2|94226|ES	-2.79738	2.847*10^-2	0.0284684	2.352*10^-3	0.00235192	3.446*10^-1	0.34459	5.152*10^-3	0.00515189
OSCAR|51772|ES	2.79557	1.757*10^1	17.5658	2.355*10^0	2.35524	1.310*10^2	131.008	5.181*10^-3	0.00518085
ZNF407|45821|AT	2.79547	2.819*10^14	281869125943189	2.084*10^4	20835.8	3.813*10^24	3.81315e+24	5.182*10^-3	0.00518242
TPPP3|37058|AP	2.79267	3.365*10^5	336503	4.446*10^1	44.4642	2.547*10^9	2.54664e+09	5.228*10^-3	0.00522753
PLD3|49889|ES	2.79214	1.201*10^1	12.0128	2.098*10^0	2.09787	6.879*10^1	68.7873	5.236*10^-3	0.00523614
CREBRF|74575|AT	-2.79011	1.209*10^-10	1.20941e-10	1.306*10^-17	1.30589e-17	1.120*10^-3	0.00112006	5.269*10^-3	0.00526894
LIMS2|55227|AP	2.78936	3.892*10^0	3.89181	1.498*10^0	1.49788	1.011*10^1	10.1117	5.281*10^-3	0.00528116
LY6K|85358|RI	-2.78907	3.137*10^-1	0.313657	1.389*10^-1	0.138867	7.085*10^-1	0.708453	5.286*10^-3	0.0052859
CHMP2A|52482|AP	-2.78654	2.032*10^-5	2.03205e-05	1.018*10^-8	1.01784e-08	4.057*10^-2	0.0405685	5.327*10^-3	0.00532747
MLH1|63950|ES	-2.78598	1.773*10^-1	0.177261	5.248*10^-2	0.0524815	5.987*10^-1	0.598716	5.337*10^-3	0.00533658
ADAMTS4|8590|AT	2.77868	9.396*10^3	9395.89	1.481*10^1	14.8115	5.960*10^6	5.96041e+06	5.458*10^-3	0.00545794
NRL|26809|AP	-2.77856	1.454*10^-1	0.145421	3.732*10^-2	0.0373211	5.666*10^-1	0.56663	5.460*10^-3	0.00546002
TK1|43785|AA	-2.7782	5.368*10^-11	5.36796e-11	3.051*10^-18	3.05077e-18	9.445*10^-4	0.000944516	5.466*10^-3	0.00546602
TNK2|68202|AP	2.77595	6.215*10^0	6.21455	1.711*10^0	1.71089	2.257*10^1	22.5735	5.504*10^-3	0.0055041
ZBTB37|9031|AT	-2.77492	1.828*10^-3	0.00182787	2.128*10^-5	2.12825e-05	1.570*10^-1	0.156988	5.521*10^-3	0.00552146
HNRNPA2B1|79038|AA	-2.77423	2.676*10^-4	0.000267625	8.010*10^-7	8.00962e-07	8.942*10^-2	0.0894213	5.533*10^-3	0.00553325
PTCD2|72463|ES	2.77246	1.071*10^9	1.07067e+09	4.428*10^2	442.826	2.589*10^15	2588701372399760	5.563*10^-3	0.0055634
CORO1B|17215|RI	-2.76508	1.008*10^-1	0.100753	1.980*10^-2	0.0198035	5.126*10^-1	0.512596	5.691*10^-3	0.00569084
CHTF8|94188|ES	2.76156	3.729*10^1	37.2874	2.859*10^0	2.85874	4.864*10^2	486.351	5.753*10^-3	0.00575265
MYL5|68386|ES	-2.76143	1.973*10^-5	1.97293e-05	9.031*10^-9	9.03132e-09	4.310*10^-2	0.0430994	5.755*10^-3	0.00575487
RCAN2|76415|AP	2.76077	1.717*10^1	17.167	2.281*10^0	2.28109	1.292*10^2	129.195	5.767*10^-3	0.0057666
ZNF677|51698|AP	-2.75999	9.172*10^-2	0.0917216	1.681*10^-2	0.0168146	5.003*10^-1	0.500329	5.780*10^-3	0.0057803
TCTN1|24463|ES	-2.75891	1.779*10^-4	0.000177904	3.857*10^-7	3.85714e-07	8.205*10^-2	0.0820549	5.800*10^-3	0.00579953
CDK11A|221|ES	-2.75742	1.096*10^-1	0.109594	2.276*10^-2	0.022765	5.276*10^-1	0.527598	5.826*10^-3	0.00582599
TMEM234|1573|RI	-2.75549	2.907*10^-2	0.0290685	2.347*10^-3	0.00234672	3.601*10^-1	0.360067	5.861*10^-3	0.0058605
DHCR7|17421|AD	-2.75408	1.408*10^-3	0.0014082	1.317*10^-5	1.31671e-05	1.506*10^-1	0.150605	5.886*10^-3	0.00588569
PMFBP1|37552|AT	-2.75358	1.784*10^-1	0.178377	5.229*10^-2	0.0522943	6.085*10^-1	0.608452	5.895*10^-3	0.00589465
NBAS|95420|ES	-2.75315	2.071*10^-6	2.07087e-06	1.861*10^-10	1.86136e-10	2.304*10^-2	0.0230397	5.902*10^-3	0.00590248
C9orf85|86575|AT	-2.7528	3.338*10^-2	0.0333846	2.967*10^-3	0.00296707	3.756*10^-1	0.375634	5.909*10^-3	0.00590877
C9orf85|86576|AT	2.75276	2.995*10^1	29.952	2.662*10^0	2.66202	3.370*10^2	337.007	5.909*10^-3	0.0059095
HHLA3|3402|ES	2.75158	1.592*10^1	15.9224	2.217*10^0	2.21724	1.143*10^2	114.342	5.931*10^-3	0.0059308
PMFBP1|37551|AT	2.75028	5.596*10^0	5.59625	1.640*10^0	1.64026	1.909*10^1	19.0932	5.955*10^-3	0.0059545
RNF167|38606|AP	2.74992	1.266*10^1	12.6558	2.073*10^0	2.07324	7.726*10^1	77.256	5.961*10^-3	0.00596099
RNF167|38605|AP	-2.74811	7.914*10^-2	0.0791394	1.296*10^-2	0.0129635	4.831*10^-1	0.48313	5.994*10^-3	0.00599402
PAIP1|71959|AP	-2.74775	4.402*10^-4	0.000440249	1.777*10^-6	1.77686e-06	1.091*10^-1	0.10908	6.001*10^-3	0.00600064
PAIP1|71958|AP	2.74775	2.271*10^3	2271.44	9.168*10^0	9.1676	5.628*10^5	562791	6.001*10^-3	0.00600064
FASTK|82339|ES	2.74764	1.028*10^1	10.279	1.950*10^0	1.95029	5.418*10^1	54.1754	6.003*10^-3	0.00600259
C7orf49|81875|AD	2.74761	8.470*10^0	8.47015	1.845*10^0	1.84499	3.889*10^1	38.8856	6.003*10^-3	0.00600323
LDHA|14629|ES	-2.74707	5.712*10^-4	0.000571175	2.772*10^-6	2.7721e-06	1.177*10^-1	0.117687	6.013*10^-3	0.00601299
SLC25A23|47039|AT	-2.74674	3.529*10^-3	0.00352891	6.277*10^-5	6.27676e-05	1.984*10^-1	0.198402	6.019*10^-3	0.00601906
FAM156B|89171|AA	2.74567	9.577*10^7	9.57743e+07	1.923*10^2	192.282	4.770*10^13	4.77045e+13	6.039*10^-3	0.00603866
SHC3|86794|AT	-2.74404	3.118*10^-4	0.000311792	9.763*10^-7	9.76257e-07	9.958*10^-2	0.0995783	6.069*10^-3	0.00606882
ARHGEF10L|858|AP	2.74179	3.956*10^0	3.95563	1.480*10^0	1.48012	1.057*10^1	10.5715	6.111*10^-3	0.00611062
WFS1|68712|AA	-2.73909	4.984*10^-2	0.0498375	5.829*10^-3	0.00582894	4.261*10^-1	0.426111	6.161*10^-3	0.00616091
SPATS2L|56734|AP	-2.7386	1.588*10^-2	0.01588	8.189*10^-4	0.000818904	3.079*10^-1	0.307941	6.170*10^-3	0.00617013
PCBP2|22051|ES	2.7369	4.652*10^2	465.215	5.718*10^0	5.71845	3.785*10^4	37846.7	6.202*10^-3	0.00620212
SCRN2|42120|RI	-2.73495	9.891*10^-2	0.0989096	1.884*10^-2	0.0188447	5.191*10^-1	0.519144	6.239*10^-3	0.00623905
FAM120AOS|86912|AP	-2.73462	1.454*10^-3	0.00145449	1.346*10^-5	1.34635e-05	1.571*10^-1	0.15713	6.245*10^-3	0.00624524
FAM120AOS|86913|AP	2.73462	6.875*10^2	687.529	6.364*10^0	6.36414	7.427*10^4	74274.8	6.245*10^-3	0.00624524
CDCA7|56003|ES	-2.73421	1.065*10^-6	1.06487e-06	5.570*10^-11	5.57033e-11	2.036*10^-2	0.0203571	6.253*10^-3	0.00625307
WWTR1|67227|AP	2.72782	5.575*10^5	557513	4.145*10^1	41.4493	7.499*10^9	7.49882e+09	6.375*10^-3	0.00637544
ACOT11|3146|AT	2.72666	1.372*10^1	13.7247	2.089*10^0	2.08857	9.019*10^1	90.1893	6.398*10^-3	0.00639788
ACOT11|3145|AT	-2.72666	7.286*10^-2	0.0728635	1.109*10^-2	0.0110883	4.788*10^-1	0.478801	6.398*10^-3	0.00639789
NR1H3|15692|AP	-2.72423	2.223*10^-1	0.222339	7.537*10^-2	0.075374	6.559*10^-1	0.655858	6.445*10^-3	0.00644525
GSN|87422|AP	2.72347	5.462*10^2	546.242	5.853*10^0	5.85341	5.098*10^4	50975.4	6.460*10^-3	0.00645995
AGPAT3|60800|AP	2.71715	9.300*10^0	9.30004	1.862*10^0	1.8616	4.646*10^1	46.4604	6.585*10^-3	0.00658463
TNFSF12|38966|AT	2.71648	2.306*10^1	23.0628	2.396*10^0	2.3964	2.220*10^2	221.956	6.598*10^-3	0.00659802
TNFSF12|38967|AT	-2.71648	4.336*10^-2	0.0433598	4.505*10^-3	0.0045054	4.173*10^-1	0.417292	6.598*10^-3	0.00659802
KLF7|57167|AD	-2.71513	1.693*10^-6	1.69317e-06	1.155*10^-10	1.15501e-10	2.482*10^-2	0.0248207	6.625*10^-3	0.00662499
SEC24C|12179|ES	2.71485	2.002*10^9	2.00234e+09	3.858*10^2	385.807	1.039*10^16	1.03921e+16	6.631*10^-3	0.00663056
ATXN3|28923|AA	-2.71315	8.093*10^-7	8.09294e-07	3.216*10^-11	3.21629e-11	2.036*10^-2	0.0203638	6.665*10^-3	0.00666473
KANK1|85709|AP	-2.713	2.558*10^-1	0.255782	9.552*10^-2	0.0955198	6.849*10^-1	0.684929	6.668*10^-3	0.00666778
ZNF783|82187|RI	-2.71109	9.514*10^-2	0.0951445	1.737*10^-2	0.0173705	5.211*10^-1	0.521141	6.706*10^-3	0.00670634
PSEN1|28272|AD	-2.70707	4.738*10^-2	0.0473845	5.209*10^-3	0.00520927	4.310*10^-1	0.431019	6.788*10^-3	0.0067879
ECE2|67861|AT	2.70635	4.674*10^0	4.67388	1.530*10^0	1.53	1.428*10^1	14.2779	6.803*10^-3	0.00680265
ECE2|67860|AT	-2.70634	2.140*10^-1	0.213957	7.004*10^-2	0.0700392	6.536*10^-1	0.6536	6.803*10^-3	0.00680295
NAV2|14696|AP	2.70274	4.814*10^0	4.81357	1.540*10^0	1.54013	1.504*10^1	15.0445	6.877*10^-3	0.00687711
PTK7|76242|AP	2.70264	4.361*10^1	43.6072	2.822*10^0	2.82191	6.739*10^2	673.865	6.879*10^-3	0.00687917
AP1S2|88572|AA	-2.69891	1.544*10^-1	0.154352	3.974*10^-2	0.039738	5.995*10^-1	0.599542	6.957*10^-3	0.00695673
PPT2-EGFL8|75759|ES	2.69595	2.674*10^3	2674.09	8.622*10^0	8.62204	8.294*10^5	829357	7.019*10^-3	0.00701879
MTIF2|53607|ES	2.69583	1.963*10^1	19.6311	2.254*10^0	2.25386	1.710*10^2	170.987	7.021*10^-3	0.00702139
C12orf57|20020|AD	-2.69577	2.380*10^-6	2.37971e-06	1.941*10^-10	1.94072e-10	2.918*10^-2	0.02918	7.023*10^-3	0.00702267
PPFIBP1|20890|ES	2.69538	5.768*10^0	5.76754	1.613*10^0	1.61299	2.062*10^1	20.6229	7.031*10^-3	0.0070309
TMEM116|24565|ES	2.69483	1.641*10^1	16.4093	2.145*10^0	2.14461	1.256*10^2	125.555	7.042*10^-3	0.00704247
RNF217|77399|AP	-2.69446	1.345*10^-3	0.0013453	1.097*10^-5	1.09726e-05	1.649*10^-1	0.164942	7.050*10^-3	0.0070503
STAT3|41034|AA	-2.69353	6.691*10^-7	6.69052e-07	2.150*10^-11	2.15036e-11	2.082*10^-2	0.0208165	7.070*10^-3	0.00707004
ZNF677|51699|AP	2.69107	1.025*10^1	10.2484	1.882*10^0	1.8818	5.581*10^1	55.8137	7.122*10^-3	0.00712231
DDX55|25092|ES	2.6878	7.913*10^0	7.91309	1.751*10^0	1.75092	3.576*10^1	35.7624	7.192*10^-3	0.00719242
BTBD7|29034|ES	-2.68728	8.406*10^-2	0.0840612	1.381*10^-2	0.0138118	5.116*10^-1	0.511611	7.204*10^-3	0.00720362
TMEM91|50052|RI	-2.68687	2.282*10^-1	0.228159	7.764*10^-2	0.0776422	6.705*10^-1	0.670468	7.213*10^-3	0.00721256
TMEM218|19267|ES	-2.68581	1.943*10^-1	0.194337	5.880*10^-2	0.0588006	6.423*10^-1	0.642289	7.235*10^-3	0.00723536
CDC25B|58601|AP	-2.68526	3.594*10^-2	0.0359399	3.172*10^-3	0.00317175	4.072*10^-1	0.407245	7.247*10^-3	0.00724723
CDC25B|58600|AP	2.68526	2.782*10^1	27.8242	2.456*10^0	2.45553	3.153*10^2	315.283	7.247*10^-3	0.00724723
TMEM170A|37612|RI	-2.68494	1.435*10^-13	1.43516e-13	6.049*10^-23	6.04858e-23	3.405*10^-4	0.000340523	7.254*10^-3	0.00725419
HDAC8|89499|ES	2.68354	5.212*10^10	5.21233e+10	7.757*10^2	775.694	3.502*10^18	3.50246e+18	7.285*10^-3	0.00728469
SLC25A23|47037|AT	2.67998	2.391*10^2	239.061	4.355*10^0	4.3553	1.312*10^4	13121.9	7.363*10^-3	0.00736275
SPHK1|43583|AP	2.67797	8.993*10^0	8.993	1.802*10^0	1.80201	4.488*10^1	44.8799	7.407*10^-3	0.00740695
NSMF|88322|ES	2.67646	7.437*10^1	74.3721	3.169*10^0	3.16943	1.745*10^3	1745.18	7.440*10^-3	0.0074405
ATP5SL|50073|ES	2.67607	4.634*10^0	4.63353	1.507*10^0	1.50728	1.424*10^1	14.2439	7.449*10^-3	0.00744915
CCDC74B|55278|AA	-2.6746	1.903*10^-1	0.190274	5.640*10^-2	0.0564032	6.419*10^-1	0.64188	7.482*10^-3	0.00748177
ZBTB45|52479|AD	2.67213	1.552*10^1	15.5203	2.077*10^0	2.07681	1.160*10^2	115.986	7.537*10^-3	0.00753704
TMEM161B|72740|AD	-2.67187	4.239*10^-3	0.00423867	7.703*10^-5	7.7032e-05	2.332*10^-1	0.233232	7.543*10^-3	0.00754303
IP6K2|64757|ES	2.67176	2.100*10^1	21.001	2.250*10^0	2.25042	1.960*10^2	195.981	7.545*10^-3	0.0075455
WWC2|71263|AD	-2.67148	9.910*10^-8	9.90966e-08	7.203*10^-13	7.20321e-13	1.363*10^-2	0.013633	7.552*10^-3	0.00755182
LRRC29|36981|AP	2.67116	4.062*10^0	4.06212	1.452*10^0	1.45238	1.136*10^1	11.3612	7.559*10^-3	0.00755903
HMBS|19096|AD	-2.67043	8.049*10^-3	0.00804942	2.337*10^-4	0.000233722	2.772*10^-1	0.277223	7.575*10^-3	0.00757539
PLRG1|70898|AD	-2.6697	1.173*10^-6	1.17258e-06	5.188*10^-11	5.18799e-11	2.650*10^-2	0.0265024	7.592*10^-3	0.00759184
COPZ1|22162|ES	-2.66838	1.102*10^-2	0.0110202	4.019*10^-4	0.000401928	3.022*10^-1	0.302154	7.622*10^-3	0.00762178
PPP6R3|17327|ES	-2.665	1.468*10^-1	0.146812	3.581*10^-2	0.0358063	6.020*10^-1	0.601953	7.699*10^-3	0.00769877
BCCIP|13431|AT	2.66451	1.549*10^1	15.4861	2.064*10^0	2.06368	1.162*10^2	116.209	7.710*10^-3	0.00771004
VGLL4|63394|AP	2.66413	7.527*10^1	75.2712	3.133*10^0	3.13343	1.808*10^3	1808.16	7.719*10^-3	0.0077187
ZNF83|51514|ES	2.66392	1.509*10^3	1509.24	6.918*10^0	6.91832	3.292*10^5	329241	7.724*10^-3	0.00772371
QTRTD1|66249|ES	-2.66203	1.050*10^-1	0.104952	1.996*10^-2	0.0199607	5.518*10^-1	0.551827	7.767*10^-3	0.00776717
HNRNPF|11323|AP	-2.66099	6.079*10^-3	0.00607943	1.418*10^-4	0.000141761	2.607*10^-1	0.260716	7.791*10^-3	0.00779112
BCAR1|37601|AD	-2.65971	2.284*10^-1	0.228438	7.696*10^-2	0.0769552	6.781*10^-1	0.678106	7.821*10^-3	0.00782078
ATG4D|47547|AA	-2.65947	6.252*10^-2	0.0625243	8.105*10^-3	0.00810525	4.823*10^-1	0.482316	7.826*10^-3	0.00782641
FAM13A|69904|AP	2.65937	4.105*10^0	4.10478	1.450*10^0	1.44975	1.162*10^1	11.6222	7.829*10^-3	0.0078286
ZFP14|49378|AT	-2.65567	2.461*10^-2	0.0246067	1.598*10^-3	0.0015981	3.789*10^-1	0.378881	7.915*10^-3	0.00791501
ZFP14|49377|AT	2.65567	4.064*10^1	40.6393	2.639*10^0	2.63935	6.257*10^2	625.741	7.915*10^-3	0.00791501
SEPT9|43715|AP	-2.65375	1.483*10^-1	0.148285	3.622*10^-2	0.0362158	6.071*10^-1	0.607147	7.960*10^-3	0.00796023
ELP5|38889|RI	-2.65186	2.713*10^-2	0.0271262	1.886*10^-3	0.00188592	3.902*10^-1	0.390173	8.005*10^-3	0.00800503
ITGBL1|26207|AT	2.65102	3.241*10^0	3.24105	1.359*10^0	1.3587	7.731*10^0	7.7312	8.025*10^-3	0.00802479
MUTYH|2651|ES	2.65097	4.075*10^0	4.07541	1.442*10^0	1.44228	1.152*10^1	11.5158	8.026*10^-3	0.00802602
ITGBL1|26208|AT	-2.65086	3.086*10^-1	0.308556	1.293*10^-1	0.129349	7.360*10^-1	0.736046	8.029*10^-3	0.00802874
SETD9|72117|ES	-2.65061	8.058*10^-2	0.0805821	1.252*10^-2	0.0125161	5.188*10^-1	0.518811	8.035*10^-3	0.0080347
FYN|77273|ME	-2.64972	9.568*10^-3	0.00956754	3.071*10^-4	0.000307062	2.981*10^-1	0.298108	8.056*10^-3	0.00805573
IL6ST|72074|ES	-2.64806	3.856*10^-5	3.85574e-05	2.085*10^-8	2.08524e-08	7.129*10^-2	0.0712948	8.096*10^-3	0.0080956
MSL1|40842|AT	2.64719	1.294*10^1	12.9358	1.944*10^0	1.94369	8.609*10^1	86.092	8.116*10^-3	0.00811646
MSL1|40843|AT	-2.64719	7.730*10^-2	0.0773046	1.162*10^-2	0.0116155	5.145*10^-1	0.514485	8.116*10^-3	0.00811646
MRPL10|42104|ES	-2.64692	1.149*10^-2	0.0114926	4.209*10^-4	0.000420936	3.138*10^-1	0.313778	8.123*10^-3	0.00812296
MUTYH|2652|ES	2.6432	3.353*10^1	33.5301	2.479*10^0	2.47918	4.535*10^2	453.482	8.213*10^-3	0.00821254
APOBEC3F|62275|AT	-2.64127	1.745*10^-1	0.174474	4.776*10^-2	0.0477587	6.374*10^-1	0.637392	8.260*10^-3	0.00825957
APOBEC3F|62276|AT	2.64114	5.731*10^0	5.73092	1.569*10^0	1.56875	2.094*10^1	20.936	8.263*10^-3	0.00826274
YAF2|21165|ES	2.63843	3.386*10^3	3385.71	8.084*10^0	8.08425	1.418*10^6	1.41794e+06	8.329*10^-3	0.00832912
RNF170|83745|ES	2.63798	5.162*10^2	516.226	4.980*10^0	4.98027	5.351*10^4	53509	8.340*10^-3	0.00834026
ZNF74|61154|ES	2.63734	1.196*10^1	11.9554	1.891*10^0	1.89131	7.557*10^1	75.5724	8.356*10^-3	0.00835582
NAV2|14695|AP	-2.63717	2.103*10^-1	0.210273	6.599*10^-2	0.0659891	6.700*10^-1	0.670033	8.360*10^-3	0.00836014
UBE2C|59609|RI	-2.63239	2.650*10^-1	0.264965	9.856*10^-2	0.0985644	7.123*10^-1	0.71229	8.479*10^-3	0.00847854
SGK3|84034|ES	-2.63139	4.289*10^-11	4.28906e-11	8.131*10^-19	8.13106e-19	2.262*10^-3	0.00226244	8.504*10^-3	0.00850352
ATG12|73038|ES	-2.63118	2.669*10^-4	0.000266866	5.811*10^-7	5.81089e-07	1.226*10^-1	0.122558	8.509*10^-3	0.00850885
SNCAIP|73113|ES	-2.63112	6.407*10^-5	6.40725e-05	4.819*10^-8	4.81943e-08	8.518*10^-2	0.0851821	8.510*10^-3	0.00851036
CNOT4|81885|AT	2.63092	8.203*10^1	82.0279	3.077*10^0	3.07688	2.187*10^3	2186.82	8.515*10^-3	0.00851549
COA6|10335|AP	2.62719	3.580*10^1	35.8011	2.481*10^0	2.48108	5.166*10^2	516.598	8.609*10^-3	0.00860939
COA6|10336|AP	-2.62704	2.794*10^-2	0.027938	1.936*10^-3	0.00193617	4.031*10^-1	0.403132	8.613*10^-3	0.00861313
ZNF419|52270|RI	-2.6262	1.770*10^-3	0.00177014	1.564*10^-5	1.56372e-05	2.004*10^-1	0.20038	8.634*10^-3	0.00863448
ZNF333|48020|AT	-2.62578	7.697*10^-2	0.0769749	1.135*10^-2	0.0113523	5.219*10^-1	0.52193	8.645*10^-3	0.00864505
PAK1|17955|ES	2.62306	4.068*10^11	4.06791e+11	8.606*10^2	860.596	1.923*10^20	1.92284e+20	8.714*10^-3	0.00871431
VAMP4|8994|RI	2.62261	6.764*10^1	67.6444	2.900*10^0	2.90026	1.578*10^3	1577.7	8.726*10^-3	0.00872595
BTN2A1|75668|AT	-2.62219	3.608*10^-3	0.0036079	5.388*10^-5	5.38783e-05	2.416*10^-1	0.241599	8.737*10^-3	0.00873677
BTN2A1|75669|AT	2.62219	2.772*10^2	277.17	4.139*10^0	4.13909	1.856*10^4	18560.3	8.737*10^-3	0.00873677
ECHDC2|3031|ES	-2.6216	3.325*10^-2	0.0332527	2.610*10^-3	0.00261043	4.236*10^-1	0.423586	8.752*10^-3	0.00875186
LRRN3|81430|ES	-2.62142	9.710*10^-2	0.0971009	1.698*10^-2	0.0169824	5.552*10^-1	0.555198	8.756*10^-3	0.00875634
CCDC14|66492|AD	-2.62126	3.507*10^-1	0.350716	1.602*10^-1	0.160217	7.677*10^-1	0.767716	8.761*10^-3	0.00876052
ARHGEF4|55357|RI	-2.61881	5.603*10^-2	0.0560257	6.481*10^-3	0.00648121	4.843*10^-1	0.484304	8.824*10^-3	0.00882383
MRPL27|42373|RI	-2.61598	6.305*10^-4	0.000630517	2.523*10^-6	2.52312e-06	1.576*10^-1	0.157563	8.897*10^-3	0.00889727
NAGLU|94546|ES	2.61597	1.379*10^2	137.943	3.440*10^0	3.44009	5.531*10^3	5531.33	8.898*10^-3	0.0088975
FHL2|54823|AT	-2.61431	4.839*10^-4	0.000483905	1.582*10^-6	1.58236e-06	1.480*10^-1	0.147984	8.941*10^-3	0.00894081
C4orf29|70562|ES	-2.61287	6.252*10^-2	0.0625157	7.813*10^-3	0.00781336	5.002*10^-1	0.500196	8.978*10^-3	0.00897849
ARPP21|63905|AT	2.61057	6.338*10^0	6.33774	1.584*10^0	1.58438	2.535*10^1	25.3519	9.039*10^-3	0.00903914
RBBP9|114453|ES	-2.60828	3.089*10^-2	0.0308876	2.264*10^-3	0.00226437	4.213*10^-1	0.421328	9.100*10^-3	0.0090999
ARPP21|63906|AT	-2.60818	1.581*10^-1	0.158095	3.953*10^-2	0.0395303	6.323*10^-1	0.632276	9.103*10^-3	0.0091026
LYRM1|34421|ES	-2.60703	1.966*10^-2	0.0196561	1.025*10^-3	0.00102458	3.771*10^-1	0.377092	9.133*10^-3	0.00913324
NUP50|62643|ES	2.60596	3.908*10^1	39.081	2.481*10^0	2.48104	6.156*10^2	615.599	9.162*10^-3	0.00916177
FAM13A|69903|AP	-2.60441	2.501*10^-1	0.250122	8.815*10^-2	0.0881511	7.097*10^-1	0.709702	9.203*10^-3	0.00920321
RFPL3S|61917|AT	-2.60366	1.149*10^-3	0.00114906	7.038*10^-6	7.03793e-06	1.876*10^-1	0.187602	9.224*10^-3	0.0092235
HERPUD1|36507|AA	-2.60234	7.418*10^-7	7.4179e-07	1.793*10^-11	1.7933e-11	3.068*10^-2	0.0306838	9.259*10^-3	0.00925905
GANC|30140|AT	2.60147	6.218*10^2	621.784	4.885*10^0	4.88532	7.914*10^4	79138.3	9.283*10^-3	0.00928255
PXK|65445|AA	-2.59864	3.012*10^-2	0.030117	2.145*10^-3	0.00214531	4.228*10^-1	0.422797	9.359*10^-3	0.00935938
SLC16A4|4106|ES	-2.59863	2.435*10^-4	0.000243482	4.582*10^-7	4.58177e-07	1.294*10^-1	0.12939	9.360*10^-3	0.00935965
DMTF1|80294|ES	-2.59699	6.460*10^-5	6.45981e-05	4.448*10^-8	4.44804e-08	9.381*10^-2	0.0938148	9.404*10^-3	0.00940444
YAF2|21110|ES	-2.59471	1.824*10^-1	0.182393	5.044*10^-2	0.0504422	6.595*10^-1	0.659508	9.467*10^-3	0.00946712
TSC1|87999|ES	-2.59311	1.043*10^-3	0.00104331	5.819*10^-6	5.81873e-06	1.871*10^-1	0.187069	9.511*10^-3	0.00951124
SPRED2|53801|AP	-2.59252	2.411*10^-4	0.000241119	4.438*10^-7	4.43784e-07	1.310*10^-1	0.131006	9.528*10^-3	0.00952756
TCEAL1|89762|AP	-2.5922	7.444*10^-2	0.074435	1.044*10^-2	0.0104406	5.307*10^-1	0.530675	9.537*10^-3	0.00953656
TCEAL1|89761|AP	2.59214	1.343*10^1	13.434	1.884*10^0	1.88429	9.578*10^1	95.7776	9.538*10^-3	0.00953815
COX7A2|76779|ES	-2.592	1.368*10^-1	0.136756	3.038*10^-2	0.0303798	6.156*10^-1	0.615615	9.542*10^-3	0.00954209
WHSC1L1|83392|AT	-2.59057	2.690*10^-2	0.026904	1.745*10^-3	0.00174522	4.147*10^-1	0.414746	9.582*10^-3	0.00958184
WHSC1L1|83393|AT	2.59057	3.717*10^1	37.1692	2.411*10^0	2.41111	5.730*10^2	572.993	9.582*10^-3	0.00958184
SEPT2|58351|AP	-2.58818	2.478*10^-3	0.00247828	2.635*10^-5	2.63514e-05	2.331*10^-1	0.233076	9.649*10^-3	0.00964853
SEPT2|58350|AP	2.58818	4.035*10^2	403.505	4.290*10^0	4.29045	3.795*10^4	37948.6	9.649*10^-3	0.00964853
ZHX3|59398|AD	-2.58729	2.238*10^-5	2.23821e-05	6.719*10^-9	6.71874e-09	7.456*10^-2	0.0745611	9.673*10^-3	0.00967334
EBAG9|84897|AP	2.58499	2.914*10^1	29.1375	2.260*10^0	2.25992	3.757*10^2	375.675	9.738*10^-3	0.00973809
EBAG9|84898|AP	-2.58499	3.432*10^-2	0.03432	2.662*10^-3	0.00266187	4.425*10^-1	0.442495	9.738*10^-3	0.00973809
CEP63|66882|ES	-2.58391	4.586*10^-2	0.0458637	4.427*10^-3	0.00442748	4.751*10^-1	0.475096	9.769*10^-3	0.0097688
DRAM1|24011|ES	-2.58293	3.392*10^-5	3.39163e-05	1.377*10^-8	1.37665e-08	8.356*10^-2	0.0835592	9.796*10^-3	0.00979643
TCF3|46540|AA	-2.58293	6.525*10^-3	0.00652528	1.433*10^-4	0.000143313	2.971*10^-1	0.297106	9.796*10^-3	0.00979648
RNF123|64908|AD	-2.58231	3.830*10^-3	0.00382963	5.608*10^-5	5.60765e-05	2.615*10^-1	0.261537	9.814*10^-3	0.0098142
CLEC16A|34004|AT	-2.58138	5.988*10^-5	5.98843e-05	3.725*10^-8	3.72528e-08	9.626*10^-2	0.0962646	9.840*10^-3	0.0098405
UBE2N|23687|AD	-2.58009	1.533*10^-1	0.153328	3.690*10^-2	0.036896	6.372*10^-1	0.637182	9.877*10^-3	0.00987746
EDNRB|26098|AP	-2.57952	2.135*10^-4	0.000213518	3.471*10^-7	3.47118e-07	1.313*10^-1	0.131339	9.894*10^-3	0.00989375
EDNRB|26097|AP	2.57952	4.683*10^3	4683.44	7.614*10^0	7.6139	2.881*10^6	2.88087e+06	9.894*10^-3	0.00989375
CHI3L2|4149|ES	2.57878	4.553*10^2	455.332	4.344*10^0	4.34412	4.773*10^4	47725.9	9.915*10^-3	0.00991511
TMED4|79540|ES	2.57597	5.678*10^9	5.67775e+09	2.151*10^2	215.064	1.499*10^17	1.49894e+17	9.996*10^-3	0.00999596
SLC19A1|60878|AP	-2.57456	8.462*10^-2	0.0846156	1.291*10^-2	0.0129104	5.546*10^-1	0.554578	1.004*10^-2	0.0100368
IFRD1|81445|AP	-2.5735	9.801*10^-3	0.00980142	2.894*10^-4	0.000289378	3.320*10^-1	0.33198	1.007*10^-2	0.0100675
NR1H3|15695|AP	2.57274	5.210*10^0	5.20954	1.482*10^0	1.48159	1.832*10^1	18.3177	1.009*10^-2	0.0100897
ALDH16A1|50937|ES	-2.57247	3.173*10^-3	0.00317309	3.962*10^-5	3.96156e-05	2.542*10^-1	0.254155	1.010*10^-2	0.0100975
CPSF4|80633|AA	-2.57224	3.474*10^-3	0.00347366	4.645*10^-5	4.6446e-05	2.598*10^-1	0.259793	1.010*10^-2	0.0101042
RAP1A|4179|ES	-2.57169	9.450*10^-2	0.0945012	1.565*10^-2	0.0156526	5.705*10^-1	0.570544	1.012*10^-2	0.0101204
RHOD|17150|ES	-2.57086	4.375*10^-3	0.00437452	6.957*10^-5	6.95712e-05	2.751*10^-1	0.275063	1.014*10^-2	0.0101447
NOL8|86863|ES	-2.5696	2.339*10^-2	0.0233935	1.334*10^-3	0.00133389	4.103*10^-1	0.410272	1.018*10^-2	0.0101817
ZC3H13|25815|AA	-2.56919	4.401*10^-2	0.0440084	4.062*10^-3	0.00406187	4.768*10^-1	0.47681	1.019*10^-2	0.0101937
ANGEL2|9775|AP	2.56887	1.005*10^1	10.0486	1.728*10^0	1.72795	5.844*10^1	58.4361	1.020*10^-2	0.0102031
ANGEL2|9776|AP	-2.56887	9.952*10^-2	0.0995161	1.711*10^-2	0.0171127	5.787*10^-1	0.578719	1.020*10^-2	0.0102031
ZNF570|49523|AD	2.5665	7.172*10^0	7.1719	1.593*10^0	1.59298	3.229*10^1	32.2892	1.027*10^-2	0.010273
GPR56|36580|AA	-2.56545	5.819*10^-3	0.00581851	1.141*10^-4	0.000114068	2.968*10^-1	0.296796	1.030*10^-2	0.0103041
RPLP0|24730|ES	-2.56169	2.211*10^-7	2.21052e-07	1.788*10^-12	1.78786e-12	2.733*10^-2	0.0273309	1.042*10^-2	0.0104163
RNF220|2553|AP	2.56134	1.286*10^1	12.8596	1.822*10^0	1.82152	9.079*10^1	90.7866	1.043*10^-2	0.010427
FAM13A|69906|AT	2.56132	1.335*10^1	13.3537	1.838*10^0	1.83769	9.704*10^1	97.0356	1.043*10^-2	0.0104276
RAB1A|53794|ES	-2.55967	2.984*10^-2	0.0298389	2.027*10^-3	0.00202725	4.392*10^-1	0.439196	1.048*10^-2	0.0104773
POLB|83712|ES	-2.55768	8.785*10^-7	8.78465e-07	2.008*10^-11	2.00801e-11	3.843*10^-2	0.0384311	1.054*10^-2	0.0105373
SPATS2L|56732|AP	2.55747	3.915*10^1	39.1492	2.356*10^0	2.35565	6.506*10^2	650.63	1.054*10^-2	0.0105436
LMF1|33029|AP	-2.55391	3.404*10^-1	0.340354	1.488*10^-1	0.148839	7.783*10^-1	0.778295	1.065*10^-2	0.0106521
LMF1|33028|AP	2.55391	2.938*10^0	2.93812	1.285*10^0	1.28486	6.719*10^0	6.71867	1.065*10^-2	0.0106521
DLGAP1|44513|AP	-2.55292	4.077*10^-1	0.407703	2.047*10^-1	0.204735	8.119*10^-1	0.811888	1.068*10^-2	0.0106824
FANK1|13442|AT	-2.55283	1.435*10^-2	0.0143539	5.520*10^-4	0.000552026	3.732*10^-1	0.373232	1.069*10^-2	0.0106853
MTERFD2|58318|ES	-2.55248	6.750*10^-2	0.0674956	8.518*10^-3	0.00851753	5.349*10^-1	0.534856	1.070*10^-2	0.010696
CCDC163P|2685|AT	-2.55143	2.845*10^-7	2.84494e-07	2.664*10^-12	2.66438e-12	3.038*10^-2	0.0303773	1.073*10^-2	0.0107283
TUBA1C|21541|AP	-2.55104	1.364*10^-1	0.136443	2.953*10^-2	0.0295348	6.303*10^-1	0.630331	1.074*10^-2	0.0107403
TUBA1C|21542|AP	2.55104	7.329*10^0	7.32907	1.586*10^0	1.58647	3.386*10^1	33.8584	1.074*10^-2	0.0107403
MTF2|3772|ES	-2.54818	5.575*10^-2	0.0557513	6.052*10^-3	0.00605233	5.136*10^-1	0.513556	1.083*10^-2	0.0108286
SERHL2|62518|ES	2.54486	4.107*10^1	41.0659	2.349*10^0	2.34874	7.180*10^2	718.003	1.093*10^-2	0.010932
METTL1|22747|ES	-2.54419	4.328*10^-5	4.32817e-05	1.882*10^-8	1.88214e-08	9.953*10^-2	0.0995308	1.095*10^-2	0.0109531
TAZ|90594|ES	2.54189	6.061*10^0	6.06105	1.511*10^0	1.51061	2.432*10^1	24.3189	1.103*10^-2	0.0110254
PCBP2|22052|ES	2.5406	2.029*10^1	20.2854	1.990*10^0	1.98951	2.068*10^2	206.834	1.107*10^-2	0.0110664
TRPC4|25682|RI	-2.53983	5.203*10^-2	0.0520269	5.316*10^-3	0.0053156	5.092*10^-1	0.509218	1.109*10^-2	0.0110907
TMEM260|27646|ES	-2.53909	4.953*10^-2	0.049529	4.869*10^-3	0.00486858	5.039*10^-1	0.503868	1.111*10^-2	0.011114
TMEM87A|30133|AP	2.53777	1.866*10^3	1865.54	5.555*10^0	5.5553	6.265*10^5	626471	1.116*10^-2	0.011156
TMEM87A|30132|AP	-2.53777	5.360*10^-4	0.000536038	1.596*10^-6	1.59624e-06	1.800*10^-1	0.180008	1.116*10^-2	0.011156
WDR81|38362|AP	-2.53651	2.072*10^-3	0.00207204	1.749*10^-5	1.74893e-05	2.455*10^-1	0.245483	1.120*10^-2	0.0111964
MAP2K3|39819|ES	2.53641	5.526*10^1	55.2595	2.489*10^0	2.48881	1.227*10^3	1226.94	1.120*10^-2	0.0111997
ATG9A|57645|ES	2.53553	1.382*10^1	13.8228	1.815*10^0	1.81517	1.053*10^2	105.263	1.123*10^-2	0.0112276
KIF13A|75456|AT	-2.53254	1.231*10^-2	0.0123076	4.094*10^-4	0.000409388	3.700*10^-1	0.370007	1.132*10^-2	0.0113239
TFCP2|21800|AA	-2.53227	1.678*10^-3	0.00167802	1.193*10^-5	1.19347e-05	2.359*10^-1	0.235931	1.133*10^-2	0.0113325
SEPT10|54906|AD	-2.52953	1.044*10^-3	0.0010438	5.111*10^-6	5.11142e-06	2.132*10^-1	0.213154	1.142*10^-2	0.0114216
VHL|63312|ES	-2.52932	3.769*10^-4	0.000376896	8.378*10^-7	8.37817e-07	1.695*10^-1	0.169549	1.143*10^-2	0.0114282
ACAN|32395|AT	2.52932	6.698*10^2	669.843	4.326*10^0	4.32645	1.037*10^5	103708	1.143*10^-2	0.0114284
FAHD2B|200599|ES	2.52878	4.481*10^0	4.48112	1.401*10^0	1.40127	1.433*10^1	14.3302	1.145*10^-2	0.011446
ARPP21|63897|AP	-2.52683	8.251*10^-2	0.0825143	1.192*10^-2	0.0119158	5.714*10^-1	0.571394	1.151*10^-2	0.0115097
ATG4D|47537|ES	2.52553	7.778*10^1	77.776	2.651*10^0	2.65115	2.282*10^3	2281.69	1.155*10^-2	0.0115524
CPSF4|80635|AA	-2.52455	4.627*10^-2	0.0462691	4.257*10^-3	0.00425672	5.029*10^-1	0.50293	1.158*10^-2	0.0115846
TAZ|90593|ES	2.52438	7.250*10^0	7.24999	1.557*10^0	1.55725	3.375*10^1	33.7533	1.159*10^-2	0.0115904
BCAS3|42871|ES	2.52335	1.069*10^1	10.6914	1.697*10^0	1.69727	6.735*10^1	67.347	1.162*10^-2	0.0116244
SIAH1|36338|AP	2.52285	4.017*10^1	40.1684	2.280*10^0	2.27955	7.078*10^2	707.816	1.164*10^-2	0.011641
EZR|78288|AP	2.52148	6.588*10^0	6.58771	1.522*10^0	1.52169	2.852*10^1	28.5195	1.169*10^-2	0.0116863
EZR|78289|AP	-2.52142	1.518*10^-1	0.151805	3.507*10^-2	0.0350654	6.572*10^-1	0.657195	1.169*10^-2	0.0116883
CLU|83170|AP	-2.52074	3.155*10^-3	0.00315463	3.583*10^-5	3.58338e-05	2.777*10^-1	0.277719	1.171*10^-2	0.0117109
TRIM16L|39640|RI	-2.5206	4.310*10^-2	0.043102	3.739*10^-3	0.00373863	4.969*10^-1	0.496914	1.172*10^-2	0.0117154
RBM6|64954|AA	2.52012	1.288*10^1	12.8766	1.765*10^0	1.76474	9.396*10^1	93.955	1.173*10^-2	0.0117314
WDR66|24919|AT	2.51926	5.801*10^0	5.80136	1.477*10^0	1.47744	2.278*10^1	22.7798	1.176*10^-2	0.0117601
SLC43A3|15838|AA	-2.51824	7.136*10^-2	0.0713642	9.144*10^-3	0.009144	5.570*10^-1	0.556961	1.179*10^-2	0.0117943
KLK10|51264|AP	-2.51669	1.650*10^-2	0.0164959	6.747*10^-4	0.00067467	4.033*10^-1	0.403328	1.185*10^-2	0.0118463
PLAA|86036|AT	2.51613	2.875*10^3	2875.22	5.814*10^0	5.81443	1.422*10^6	1.42179e+06	1.187*10^-2	0.0118651
SMTN|61815|ES	2.51585	5.249*10^1	52.4855	2.399*10^0	2.39909	1.148*10^3	1148.24	1.187*10^-2	0.0118747
MECP2|90550|RI	-2.51534	8.129*10^-4	0.000812872	3.179*10^-6	3.17907e-06	2.078*10^-1	0.207847	1.189*10^-2	0.0118917
DHRS4L2|26796|AP	-2.51406	2.481*10^-1	0.248095	8.369*10^-2	0.0836877	7.355*10^-1	0.735485	1.193*10^-2	0.0119349
DHRS4L2|26795|AP	2.51406	4.031*10^0	4.03071	1.360*10^0	1.35965	1.195*10^1	11.9492	1.193*10^-2	0.0119349
PDE4D|72138|AP	2.51387	9.214*10^0	9.21417	1.631*10^0	1.6312	5.205*10^1	52.0481	1.194*10^-2	0.0119416
TESK2|2683|ES	-2.51323	1.018*10^-3	0.00101831	4.725*10^-6	4.72547e-06	2.194*10^-1	0.219439	1.196*10^-2	0.0119632
PMS2|78701|ES	-2.51297	1.320*10^-4	0.000132023	1.244*10^-7	1.24449e-07	1.401*10^-1	0.140058	1.197*10^-2	0.0119719
AUH|86822|AT	-2.51097	2.992*10^-2	0.0299228	1.934*10^-3	0.00193388	4.630*10^-1	0.462995	1.204*10^-2	0.0120401
AUH|86823|AT	2.51095	3.342*10^1	33.4164	2.160*10^0	2.15977	5.170*10^2	517.024	1.204*10^-2	0.0120406
ATXN2|24518|ES	-2.51068	7.972*10^-2	0.0797194	1.107*10^-2	0.011068	5.742*10^-1	0.574192	1.205*10^-2	0.0120497
FASTK|82338|ES	2.51054	3.282*10^10	3.28218e+10	2.024*10^2	202.421	5.322*10^18	5.32193e+18	1.205*10^-2	0.0120547
RPS24|12296|ES	-2.51013	1.767*10^-4	0.000176684	2.075*10^-7	2.07453e-07	1.505*10^-1	0.150478	1.207*10^-2	0.0120688
WDR66|24918|AT	-2.50991	1.732*10^-1	0.173173	4.404*10^-2	0.044037	6.810*10^-1	0.680993	1.208*10^-2	0.0120761
GLIPR1L2|23457|AP	-2.50962	2.002*10^-8	2.00235e-08	1.946*10^-14	1.94619e-14	2.060*10^-2	0.0206012	1.209*10^-2	0.0120862
NSUN4|2792|AP	-2.50916	1.510*10^-5	1.51002e-05	2.589*10^-9	2.58922e-09	8.806*10^-2	0.0880632	1.210*10^-2	0.0121019
CAPS|46956|AD	-2.5091	7.284*10^-4	0.000728372	2.579*10^-6	2.57873e-06	2.057*10^-1	0.205731	1.210*10^-2	0.0121039
RAB15|27925|AD	-2.50839	1.963*10^-2	0.019627	9.098*10^-4	0.000909819	4.234*10^-1	0.423403	1.213*10^-2	0.0121282
PLCH1|67347|AT	-2.50838	9.295*10^-3	0.00929451	2.403*10^-4	0.000240251	3.596*10^-1	0.359573	1.213*10^-2	0.0121286
BRPF3|75967|AA	-2.50832	1.493*10^-2	0.0149334	5.591*10^-4	0.000559078	3.989*10^-1	0.398882	1.213*10^-2	0.0121307
EPB41L2|77546|ES	-2.50668	2.300*10^-27	2.30011e-27	3.415*10^-48	3.41488e-48	1.549*10^-6	1.54925e-06	1.219*10^-2	0.0121872
RPL22L1|67620|AA	2.50301	9.290*10^3	9290.49	7.259*10^0	7.25934	1.189*10^7	1.189e+07	1.231*10^-2	0.0123141
MB21D1|76743|AT	2.50266	3.002*10^3	3002.04	5.676*10^0	5.67633	1.588*10^6	1.58769e+06	1.233*10^-2	0.0123265
AP5S1|58606|AD	-2.50222	1.087*10^-2	0.0108651	3.145*10^-4	0.000314538	3.753*10^-1	0.37531	1.234*10^-2	0.0123418
ARMC10|81156|ES	-2.50177	2.618*10^-6	2.61756e-06	1.108*10^-10	1.10843e-10	6.181*10^-2	0.0618141	1.236*10^-2	0.0123574
KRT15|40913|RI	-2.50132	1.946*10^-1	0.194626	5.398*10^-2	0.0539809	7.017*10^-1	0.701717	1.237*10^-2	0.012373
CTXN2|93675|AP	-2.50014	4.239*10^-2	0.0423862	3.557*10^-3	0.00355669	5.051*10^-1	0.505128	1.241*10^-2	0.0124145
TMEM116|24558|ES	2.49814	1.159*10^1	11.5897	1.695*10^0	1.69526	7.923*10^1	79.2337	1.248*10^-2	0.0124845
DMXL2|30617|AA	-2.49741	1.423*10^-1	0.142265	3.079*10^-2	0.0307931	6.573*10^-1	0.657274	1.251*10^-2	0.0125105
UBXN11|101232|ES	2.49699	5.387*10^0	5.38743	1.436*10^0	1.43648	2.021*10^1	20.2053	1.253*10^-2	0.0125251
CCNJL|74417|AT	-2.49612	1.144*10^-3	0.00114361	5.603*10^-6	5.60305e-06	2.334*10^-1	0.233418	1.256*10^-2	0.0125562
PSMG4|75172|AT	2.4955	9.969*10^0	9.96908	1.638*10^0	1.63799	6.067*10^1	60.6733	1.258*10^-2	0.012578
DBNDD2|59542|AD	2.49505	7.057*10^1	70.572	2.491*10^0	2.49147	1.999*10^3	1998.99	1.259*10^-2	0.012594
ANAPC1|54969|AP	2.49499	1.785*10^1	17.8524	1.855*10^0	1.8553	1.718*10^2	171.782	1.260*10^-2	0.012596
ZNF576|50215|RI	-2.49338	1.325*10^-1	0.132455	2.704*10^-2	0.0270369	6.489*10^-1	0.648904	1.265*10^-2	0.0126532
C5orf22|71636|AA	2.49322	2.105*10^2	210.549	3.140*10^0	3.13994	1.412*10^4	14118.4	1.266*10^-2	0.0126592
RAB7L1|9568|AD	2.49242	1.689*10^1	16.886	1.829*10^0	1.8291	1.559*10^2	155.89	1.269*10^-2	0.0126876
LMBR1|82480|ES	-2.49241	8.600*10^-3	0.00860034	2.043*10^-4	0.000204302	3.620*10^-1	0.362041	1.269*10^-2	0.012688
SAAL1|14571|ES	2.4922	7.412*10^1	74.1204	2.508*10^0	2.50811	2.190*10^3	2190.42	1.270*10^-2	0.0126953
ITGB3BP|3266|ES	-2.49096	1.454*10^-1	0.145417	3.190*10^-2	0.031896	6.630*10^-1	0.662971	1.274*10^-2	0.0127397
LSS|60909|RI	-2.48866	4.559*10^-2	0.0455915	4.006*10^-3	0.0040057	5.189*10^-1	0.518906	1.282*10^-2	0.0128224
PIP5K1A|7581|AD	-2.48761	4.819*10^-2	0.0481935	4.419*10^-3	0.00441904	5.256*10^-1	0.525592	1.286*10^-2	0.0128604
NR2E1|77142|AP	-2.48476	3.539*10^-4	0.00035392	6.710*10^-7	6.70971e-07	1.867*10^-1	0.186684	1.296*10^-2	0.0129638
HSP90AA1|29330|AP	2.48421	3.832*10^6	3.83219e+06	2.451*10^1	24.5078	5.992*10^11	5.99226e+11	1.298*10^-2	0.0129841
CC2D1B|3002|AT	-2.48302	6.099*10^-4	0.000609871	1.769*10^-6	1.76879e-06	2.103*10^-1	0.210281	1.303*10^-2	0.0130274
SMARCA2|85726|ES	2.4815	5.598*10^2	559.752	3.780*10^0	3.78046	8.288*10^4	82879.4	1.308*10^-2	0.0130831
FRMD5|30329|AA	-2.48087	1.703*10^-1	0.170284	4.205*10^-2	0.0420514	6.896*10^-1	0.689556	1.311*10^-2	0.013106
C15orf40|32245|AT	2.48077	2.271*10^2	227.117	3.124*10^0	3.12365	1.651*10^4	16513.4	1.311*10^-2	0.01311
GBA|8044|ES	-2.48032	2.110*10^-3	0.00211	1.621*10^-5	1.62147e-05	2.746*10^-1	0.27457	1.313*10^-2	0.0131266
STX3|16035|ES	2.4798	6.380*10^0	6.37996	1.475*10^0	1.47473	2.760*10^1	27.6009	1.315*10^-2	0.0131455
ZNF223|50275|ES	2.47946	6.073*10^0	6.07347	1.459*10^0	1.4593	2.528*10^1	25.2772	1.316*10^-2	0.0131582
MEF2A|32713|AP	-2.47928	1.128*10^-1	0.112795	2.009*10^-2	0.0200949	6.331*10^-1	0.633128	1.316*10^-2	0.013165
TXNDC15|73435|AP	2.47925	1.049*10^3	1049.35	4.293*10^0	4.29284	2.565*10^5	256504	1.317*10^-2	0.0131657
CRYAB|18691|AP	2.47664	2.022*10^1	20.2208	1.872*10^0	1.87247	2.184*10^2	218.365	1.326*10^-2	0.0132627
MRPS33|82031|ES	2.47655	5.698*10^3	5697.53	6.073*10^0	6.07301	5.345*10^6	5.34526e+06	1.327*10^-2	0.0132658
SRCAP|36172|ES	2.476	7.673*10^1	76.7277	2.471*10^0	2.47088	2.383*10^3	2382.6	1.329*10^-2	0.0132864
DBNDD2|59545|AD	-2.47544	4.336*10^-2	0.0433556	3.613*10^-3	0.00361333	5.202*10^-1	0.520215	1.331*10^-2	0.0133072
SDR39U1|27009|AA	2.47523	8.841*10^1	88.4117	2.542*10^0	2.54215	3.075*10^3	3074.81	1.332*10^-2	0.0133152
ZBTB49|68659|ES	-2.47237	8.074*10^-2	0.0807352	1.098*10^-2	0.010981	5.936*10^-1	0.593589	1.342*10^-2	0.0134221
SEPT9|43723|AP	2.47115	1.460*10^1	14.6025	1.741*10^0	1.7413	1.225*10^2	122.456	1.347*10^-2	0.013468
AGTRAP|672|ES	2.46754	1.326*10^2	132.617	2.733*10^0	2.73289	6.435*10^3	6435.44	1.360*10^-2	0.0136045
CHCHD3|81833|AT	2.46705	8.215*10^0	8.21549	1.542*10^0	1.54169	4.378*10^1	43.7793	1.362*10^-2	0.013623
PACS2|29637|AD	-2.46693	7.333*10^-5	7.33309e-05	3.804*10^-8	3.8043e-08	1.414*10^-1	0.141351	1.363*10^-2	0.0136278
CHCHD3|81834|AT	-2.46602	1.230*10^-1	0.122985	2.325*10^-2	0.0232528	6.505*10^-1	0.65047	1.366*10^-2	0.0136624
SAAL1|14574|ES	2.46435	6.030*10^0	6.03047	1.445*10^0	1.4445	2.518*10^1	25.1758	1.373*10^-2	0.013726
CLU|83168|AP	2.46303	4.966*10^1	49.6601	2.220*10^0	2.22025	1.111*10^3	1110.74	1.378*10^-2	0.0137769
GTF2I|80087|ES	-2.46283	5.727*10^-2	0.057268	5.881*10^-3	0.00588081	5.577*10^-1	0.557683	1.378*10^-2	0.0137845
TIMP2|43921|AP	2.46185	8.984*10^1	89.8427	2.502*10^0	2.50179	3.226*10^3	3226.38	1.382*10^-2	0.0138221
DHRS4L2|26803|ES	-2.45975	2.209*10^-9	2.20949e-09	2.801*10^-16	2.80083e-16	1.743*10^-2	0.0174299	1.390*10^-2	0.0139035
CCDC113|36631|ES	2.45749	3.178*10^4	31778.2	8.156*10^0	8.1558	1.238*10^8	1.23821e+08	1.399*10^-2	0.0139912
SNRPN|93601|ES	-2.45683	1.065*10^-1	0.106477	1.783*10^-2	0.0178336	6.357*10^-1	0.635732	1.402*10^-2	0.0140169
FDFT1|82651|ES	-2.45678	7.383*10^-2	0.0738329	9.233*10^-3	0.00923348	5.904*10^-1	0.590385	1.402*10^-2	0.0140189
TAF1A|9886|ES	-2.45635	1.430*10^-2	0.0143037	4.827*10^-4	0.000482665	4.239*10^-1	0.423887	1.404*10^-2	0.0140358
COBLL1|55785|AA	-2.45588	9.969*10^-2	0.0996852	1.583*10^-2	0.0158295	6.278*10^-1	0.62776	1.405*10^-2	0.0140541
GSG1L|35699|ES	2.45477	6.085*10^0	6.08483	1.439*10^0	1.43906	2.573*10^1	25.7287	1.410*10^-2	0.0140976
CDR2|35555|ES	-2.4535	1.937*10^-2	0.0193675	8.293*10^-4	0.000829306	4.523*10^-1	0.452307	1.415*10^-2	0.0141472
ITGB7|21973|ES	-2.45338	1.340*10^-7	1.33954e-07	4.327*10^-13	4.32702e-13	4.147*10^-2	0.041469	1.415*10^-2	0.0141522
E2F6|52691|ES	2.45245	3.577*10^0	3.57656	1.292*10^0	1.29165	9.903*10^0	9.90347	1.419*10^-2	0.0141888
TGOLN2|54196|RI	-2.4515	1.468*10^-3	0.00146799	7.971*10^-6	7.97126e-06	2.703*10^-1	0.270345	1.423*10^-2	0.0142263
ZCCHC6|86767|ES	-2.45112	6.470*10^-9	6.4698e-09	1.831*10^-15	1.83115e-15	2.286*10^-2	0.0228591	1.424*10^-2	0.0142412
NAGA|62493|RI	-2.45051	6.761*10^-2	0.0676066	7.838*10^-3	0.00783775	5.832*10^-1	0.583159	1.427*10^-2	0.0142655
SLC6A6|63528|ES	2.45014	2.434*10^1	24.3422	1.894*10^0	1.8939	3.129*10^2	312.869	1.428*10^-2	0.0142799
ZSCAN5A|52162|AP	2.45011	1.934*10^1	19.3388	1.809*10^0	1.80864	2.068*10^2	206.78	1.428*10^-2	0.0142813
ZNF558|47259|AP	2.44891	1.368*10^1	13.676	1.686*10^0	1.6858	1.109*10^2	110.946	1.433*10^-2	0.0143288
LMO3|20608|AP	2.44626	1.088*10^2	108.85	2.540*10^0	2.5404	4.664*10^3	4663.95	1.443*10^-2	0.0144348
LFNG|78616|AP	-2.4457	2.605*10^-10	2.60519e-10	5.435*10^-18	5.43482e-18	1.249*10^-2	0.012488	1.446*10^-2	0.0144569
SKIL|67614|AD	2.44431	1.283*10^3	1283.03	4.130*10^0	4.12956	3.986*10^5	398630	1.451*10^-2	0.014513
ARHGEF7|26277|AP	-2.44295	2.575*10^-1	0.257515	8.671*10^-2	0.0867146	7.647*10^-1	0.764736	1.457*10^-2	0.0145677
G6PC3|41771|AD	-2.44223	6.153*10^-4	0.000615332	1.630*10^-6	1.63032e-06	2.322*10^-1	0.232245	1.460*10^-2	0.0145968
C5orf45|74971|ES	2.44152	5.686*10^1	56.8565	2.219*10^0	2.21875	1.457*10^3	1456.98	1.463*10^-2	0.0146254
MRPS33|128279|ES	2.44136	4.842*10^0	4.84247	1.365*10^0	1.36484	1.718*10^1	17.1811	1.463*10^-2	0.0146322
ZMYND8|59714|AD	-2.44116	1.525*10^-1	0.152517	3.370*10^-2	0.0336991	6.903*10^-1	0.690266	1.464*10^-2	0.01464
NPRL3|32825|ES	-2.43994	1.490*10^-2	0.014899	5.078*10^-4	0.000507788	4.372*10^-1	0.43715	1.469*10^-2	0.0146898
CCDC90B|18086|AD	-2.43846	1.284*10^-1	0.128408	2.467*10^-2	0.0246663	6.685*10^-1	0.668466	1.475*10^-2	0.0147499
NFATC4|26991|RI	-2.43713	1.208*10^-1	0.120773	2.206*10^-2	0.0220638	6.611*10^-1	0.661088	1.480*10^-2	0.0148045
AP3M1|12256|ES	-2.43408	1.471*10^-1	0.147148	3.145*10^-2	0.0314495	6.885*10^-1	0.688482	1.493*10^-2	0.0149296
C12orf76|24405|AT	2.43396	1.339*10^1	13.3923	1.657*10^0	1.65747	1.082*10^2	108.209	1.493*10^-2	0.0149346
PROM2|54495|AA	-2.43327	1.239*10^-1	0.123924	2.305*10^-2	0.0230516	6.662*10^-1	0.666203	1.496*10^-2	0.0149633
DECR1|84404|ES	2.43208	2.814*10^0	2.81358	1.222*10^0	1.22239	6.476*10^0	6.47603	1.501*10^-2	0.0150124
DLG3|89379|AP	2.43134	2.535*10^0	2.5351	1.198*10^0	1.19764	5.366*10^0	5.36618	1.504*10^-2	0.0150429
NBPF10|4448|ES	2.43115	9.179*10^0	9.17938	1.537*10^0	1.53675	5.483*10^1	54.8306	1.505*10^-2	0.0150511
CTAGE5|27372|AP	2.43047	4.906*10^0	4.90588	1.361*10^0	1.36055	1.769*10^1	17.6897	1.508*10^-2	0.0150793
RPL31|54732|AT	-2.4302	1.434*10^-2	0.0143367	4.673*10^-4	0.000467327	4.398*10^-1	0.439823	1.509*10^-2	0.0150904
TRAF1|87404|AP	2.42948	3.189*10^0	3.18878	1.251*10^0	1.25121	8.127*10^0	8.12678	1.512*10^-2	0.0151204
CFL2|27169|AD	-2.4287	4.679*10^-8	4.67937e-08	5.689*10^-14	5.68889e-14	3.849*10^-2	0.0384899	1.515*10^-2	0.0151529
GAS8|38203|ES	2.42699	3.809*10^1	38.0867	2.015*10^0	2.0146	7.200*10^2	720.042	1.522*10^-2	0.0152247
ERAP2|72873|ES	-2.42647	1.891*10^-3	0.00189079	1.194*10^-5	1.19363e-05	2.995*10^-1	0.299514	1.525*10^-2	0.0152466
CCDC74B|55281|AA	-2.42445	1.171*10^-1	0.117083	2.068*10^-2	0.0206752	6.630*10^-1	0.663039	1.533*10^-2	0.0153317
TIMP2|43920|AP	-2.42375	9.895*10^-3	0.0098945	2.368*10^-4	0.000236794	4.134*10^-1	0.413444	1.536*10^-2	0.0153612
SCYL1|16855|RI	-2.42244	8.895*10^-3	0.00889508	1.949*10^-4	0.00019491	4.059*10^-1	0.405944	1.542*10^-2	0.0154167
ZNF333|48017|AT	2.42217	9.726*10^0	9.72615	1.544*10^0	1.54356	6.129*10^1	61.2857	1.543*10^-2	0.015428
FBXW9|47842|ES	-2.42216	3.930*10^-7	3.93001e-07	2.577*10^-12	2.57695e-12	5.994*10^-2	0.0599352	1.543*10^-2	0.0154285
FAM206A|87149|AT	2.42167	9.824*10^1	98.2359	2.398*10^0	2.39795	4.024*10^3	4024.39	1.545*10^-2	0.0154492
FAM206A|87150|AT	-2.42155	1.018*10^-2	0.0101831	2.486*10^-4	0.000248595	4.171*10^-1	0.417127	1.545*10^-2	0.0154544
TMEM194A|22515|AD	2.42124	4.423*10^1	44.232	2.058*10^0	2.05841	9.505*10^2	950.477	1.547*10^-2	0.0154677
ZNF138|115220|ES	2.42074	3.991*10^0	3.99131	1.301*10^0	1.30143	1.224*10^1	12.2408	1.549*10^-2	0.0154888
NME6|64585|ES	2.42072	6.689*10^5	668945	1.285*10^1	12.8471	3.483*10^10	3.48318e+10	1.549*10^-2	0.0154896
UIMC1|74697|AD	-2.42066	1.484*10^-1	0.14837	3.165*10^-2	0.0316519	6.955*10^-1	0.695493	1.549*10^-2	0.0154925
RPL37A|57422|RI	2.42013	1.059*10^3	1059.29	3.760*10^0	3.75996	2.984*10^5	298435	1.551*10^-2	0.0155148
SCARB1|25157|AD	-2.42012	7.007*10^-4	0.000700684	1.954*10^-6	1.95359e-06	2.513*10^-1	0.251311	1.552*10^-2	0.0155152
GABARAPL1|20353|AT	2.42001	3.715*10^8	3.71486e+08	4.258*10^1	42.5752	3.241*10^15	3241359949125700	1.552*10^-2	0.01552
RPL39L|68072|ES	-2.41943	3.043*10^-4	0.000304331	4.310*10^-7	4.31047e-07	2.149*10^-1	0.214867	1.555*10^-2	0.015545
NME6|64586|ES	2.418	4.252*10^2	425.204	3.147*10^0	3.14723	5.745*10^4	57447	1.561*10^-2	0.0156061
CPT1B|62872|RI	-2.41754	1.141*10^-1	0.114133	1.964*10^-2	0.019644	6.631*10^-1	0.66312	1.563*10^-2	0.0156257
GRN|522183|ES	-2.41747	9.708*10^-2	0.0970828	1.465*10^-2	0.0146544	6.432*10^-1	0.643158	1.563*10^-2	0.015629
CTNS|38478|ES	-2.4172	4.110*10^-6	4.10959e-06	1.764*10^-10	1.76381e-10	9.575*10^-2	0.0957515	1.564*10^-2	0.0156403
MARCH8|11363|ES	2.41613	8.188*10^0	8.1884	1.487*10^0	1.48734	4.508*10^1	45.0804	1.569*10^-2	0.0156866
AMPD3|14345|AP	2.41589	6.337*10^0	6.33729	1.417*10^0	1.41688	2.834*10^1	28.3447	1.570*10^-2	0.0156969
LGI4|49049|AT	2.41522	6.709*10^1	67.09	2.210*10^0	2.2096	2.037*10^3	2037.05	1.573*10^-2	0.0157258
LGI4|49050|AT	-2.41469	1.492*10^-2	0.0149181	4.913*10^-4	0.000491296	4.530*10^-1	0.452983	1.575*10^-2	0.0157487
TRIM24|81916|AD	-2.41407	1.461*10^-2	0.0146118	4.728*10^-4	0.000472762	4.516*10^-1	0.45161	1.578*10^-2	0.0157753
HSF4|36949|AA	-2.41399	2.853*10^-2	0.0285303	1.589*10^-3	0.00158906	5.122*10^-1	0.512238	1.578*10^-2	0.0157789
COX6B2|52075|AT	-2.41274	1.735*10^-5	1.73533e-05	2.356*10^-9	2.35581e-09	1.278*10^-1	0.127828	1.583*10^-2	0.0158333
RGS10|13261|AP	2.4124	1.252*10^1	12.5236	1.606*10^0	1.60648	9.763*10^1	97.6297	1.585*10^-2	0.0158479
ADAM15|7899|AA	-2.41219	6.180*10^-2	0.0617994	6.436*10^-3	0.00643616	5.934*10^-1	0.593391	1.586*10^-2	0.0158572
RFFL|40230|AP	-2.4114	1.303*10^-1	0.130261	2.485*10^-2	0.0248509	6.828*10^-1	0.682785	1.589*10^-2	0.0158913
CD79B|43025|ES	2.41098	1.038*10^1	10.3805	1.549*10^0	1.54918	6.956*10^1	69.5558	1.591*10^-2	0.0159097
GPI|48957|AP	2.41012	4.684*10^4	46841.4	7.454*10^0	7.45354	2.944*10^8	2.94373e+08	1.595*10^-2	0.0159474
SEC31A|69734|ES	-2.4075	9.715*10^-2	0.0971482	1.456*10^-2	0.0145579	6.483*10^-1	0.648291	1.606*10^-2	0.016062
SERBP1|3355|AA	-2.40702	5.721*10^-3	0.00572135	8.541*10^-5	8.54073e-05	3.833*10^-1	0.383267	1.608*10^-2	0.0160834
VIPR2|82539|AT	-2.40662	4.255*10^-3	0.00425533	4.988*10^-5	4.98798e-05	3.630*10^-1	0.363029	1.610*10^-2	0.0161009
TAX1BP1|79062|ES	-2.4052	1.026*10^-2	0.0102636	2.459*10^-4	0.000245889	4.284*10^-1	0.428412	1.616*10^-2	0.0161635
RCBTB2|25862|ES	-2.40513	3.018*10^-5	3.01762e-05	6.252*10^-9	6.25174e-09	1.457*10^-1	0.145656	1.617*10^-2	0.0161666
BTN3A1|75662|AA	-2.40136	2.196*10^-3	0.00219602	1.486*10^-5	1.48562e-05	3.246*10^-1	0.324611	1.633*10^-2	0.0163342
IL15RA|10678|AA	2.40082	8.175*10^0	8.17505	1.471*10^0	1.47082	4.544*10^1	45.4382	1.636*10^-2	0.0163582
C12orf23|24178|AP	-2.3991	4.245*10^-2	0.0424536	3.213*10^-3	0.0032135	5.609*10^-1	0.560855	1.644*10^-2	0.0164354
SIPA1L2|10315|ES	2.3978	5.365*10^1	53.6457	2.069*10^0	2.06923	1.391*10^3	1390.79	1.649*10^-2	0.0164941
RBM23|26653|ES	2.39692	2.585*10^1	25.8458	1.809*10^0	1.80916	3.692*10^2	369.235	1.653*10^-2	0.0165336
ACY1|65149|AP	2.39638	1.162*10^2	116.212	2.377*10^0	2.37744	5.681*10^3	5680.56	1.656*10^-2	0.0165581
COPS7A|19956|AD	2.39606	6.393*10^1	63.9312	2.131*10^0	2.13133	1.918*10^3	1917.67	1.657*10^-2	0.0165723
ZBTB44|19491|RI	-2.39257	1.633*10^-6	1.63296e-06	2.967*10^-11	2.96693e-11	8.988*10^-2	0.0898758	1.673*10^-2	0.016731
ZNF461|49413|AD	2.39238	2.390*10^1	23.9034	1.775*10^0	1.77482	3.219*10^2	321.932	1.674*10^-2	0.0167393
DVL2|38854|AA	-2.39203	5.478*10^-9	5.4776e-09	9.320*10^-16	9.31973e-16	3.219*10^-2	0.0321942	1.676*10^-2	0.0167557
HAGH|33148|ES	2.39202	9.551*10^2	955.059	3.454*10^0	3.4535	2.641*10^5	264120	1.676*10^-2	0.0167561
TFB2M|10493|ES	-2.39197	5.052*10^-6	5.05228e-06	2.310*10^-10	2.30969e-10	1.105*10^-1	0.110515	1.676*10^-2	0.0167584
PDS5B|25604|ES	2.39063	3.093*10^1	30.9274	1.856*10^0	1.8556	5.155*10^2	515.469	1.682*10^-2	0.0168193
TRIM41|75051|RI	-2.39041	6.660*10^-3	0.00666	1.094*10^-4	0.000109366	4.056*10^-1	0.40557	1.683*10^-2	0.0168294
NUP214|87926|AA	2.38969	1.088*10^1	10.8753	1.536*10^0	1.53595	7.700*10^1	77.0033	1.686*10^-2	0.0168628
DCAF5|28119|AP	-2.38785	1.324*10^-1	0.132415	2.519*10^-2	0.0251894	6.961*10^-1	0.69608	1.695*10^-2	0.0169475
NXT2|89867|AP	-2.3865	2.844*10^-1	0.284357	1.012*10^-1	0.101237	7.987*10^-1	0.798713	1.701*10^-2	0.0170098
ACY1|65148|AP	-2.38598	8.780*10^-3	0.00878045	1.796*10^-4	0.000179563	4.294*10^-1	0.429355	1.703*10^-2	0.0170337
CARD9|88161|AA	-2.38586	2.746*10^-1	0.274565	9.495*10^-2	0.0949505	7.940*10^-1	0.793952	1.704*10^-2	0.0170394
ELOVL5|76494|ES	2.3857	2.829*10^1	28.2856	1.816*10^0	1.81567	4.407*10^2	440.651	1.705*10^-2	0.0170467
RLBP1|32414|AD	-2.384	5.924*10^-2	0.059238	5.801*10^-3	0.00580115	6.049*10^-1	0.604905	1.713*10^-2	0.0171258
KATNA1|78084|AP	-2.38394	3.389*10^-7	3.3891e-07	1.625*10^-12	1.62489e-12	7.069*10^-2	0.0706878	1.713*10^-2	0.0171283
FAM219B|31798|ES	2.38243	4.075*10^1	40.7463	1.930*10^0	1.9298	8.603*10^2	860.327	1.720*10^-2	0.0171986
KCNJ16|214545|ES	2.38042	1.222*10^1	12.2164	1.556*10^0	1.55593	9.592*10^1	95.9177	1.729*10^-2	0.0172928
DDX19B|37359|ES	2.3802	5.701*10^1	57.0112	2.042*10^0	2.04184	1.592*10^3	1591.84	1.730*10^-2	0.0173034
C2orf49|54816|RI	2.37821	3.208*10^1	32.0818	1.840*10^0	1.84035	5.593*10^2	559.265	1.740*10^-2	0.0173969
CPT1C|51062|ES	2.37727	1.152*10^1	11.524	1.536*10^0	1.53587	8.647*10^1	86.4677	1.744*10^-2	0.0174414
GFM2|72501|AT	-2.37641	2.069*10^-9	2.06853e-09	1.423*10^-16	1.42291e-16	3.007*10^-2	0.0300709	1.748*10^-2	0.0174821
PCBP2|22049|ES	2.37543	8.037*10^8	8.0375e+08	3.610*10^1	36.1011	1.789*10^16	1.78946e+16	1.753*10^-2	0.0175285
GOLGA5|29012|ES	2.37494	1.649*10^5	164906	8.159*10^0	8.15867	3.333*10^9	3.33313e+09	1.755*10^-2	0.0175516
ZNF512|53022|ES	-2.37421	4.008*10^-6	4.008e-06	1.404*10^-10	1.40448e-10	1.144*10^-1	0.114378	1.759*10^-2	0.0175868
VCAN|72706|ES	-2.3738	3.043*10^-2	0.0304297	1.702*10^-3	0.0017022	5.440*10^-1	0.543982	1.761*10^-2	0.0176059
TAGLN2|8421|AP	-2.37367	1.607*10^-6	1.60739e-06	2.643*10^-11	2.6428e-11	9.776*10^-2	0.0977641	1.761*10^-2	0.0176121
TMEM164|89872|AP	-2.37335	2.604*10^-1	0.260431	8.574*10^-2	0.0857352	7.911*10^-1	0.791093	1.763*10^-2	0.0176277
RAD51D|40261|ES	-2.37261	8.889*10^-2	0.0888869	1.204*10^-2	0.0120364	6.564*10^-1	0.656417	1.766*10^-2	0.0176628
PLXNC1|23724|ES	-2.37238	1.540*10^-6	1.54023e-06	2.430*10^-11	2.42999e-11	9.763*10^-2	0.0976258	1.767*10^-2	0.0176739
SCAMP5|31817|AP	2.37144	2.169*10^1	21.6948	1.706*10^0	1.7056	2.760*10^2	275.952	1.772*10^-2	0.0177187
RPL31|54729|AT	2.37064	4.052*10^1	40.5239	1.899*10^0	1.89894	8.648*10^2	864.789	1.776*10^-2	0.0177573
SYT5|52041|AP	2.36886	3.371*10^0	3.37056	1.233*10^0	1.23336	9.211*10^0	9.2112	1.784*10^-2	0.0178429
PAM|72888|AA	-2.36829	8.992*10^-4	0.000899228	2.710*10^-6	2.70982e-06	2.984*10^-1	0.298401	1.787*10^-2	0.0178703
ST8SIA1|20727|AT	-2.36798	9.881*10^-2	0.0988121	1.455*10^-2	0.0145486	6.711*10^-1	0.671118	1.789*10^-2	0.0178853
ST8SIA1|20726|AT	2.36798	1.012*10^1	10.1202	1.490*10^0	1.49005	6.874*10^1	68.7351	1.789*10^-2	0.0178853
TFRC|68216|ES	2.36798	4.390*10^9	4.39031e+09	4.586*10^1	45.8623	4.203*10^17	4.20277e+17	1.789*10^-2	0.0178855
TEX264|65100|AD	-2.36795	1.312*10^-1	0.13123	2.444*10^-2	0.0244356	7.048*10^-1	0.704759	1.789*10^-2	0.0178868
TAGLN3|66076|AA	2.36733	8.022*10^0	8.02166	1.431*10^0	1.43089	4.497*10^1	44.9701	1.792*10^-2	0.0179168
GPALPP1|25788|AT	-2.36659	7.160*10^-3	0.00716011	1.198*10^-4	0.000119785	4.280*10^-1	0.427993	1.795*10^-2	0.017953
GPALPP1|25787|AT	2.36659	1.397*10^2	139.663	2.336*10^0	2.33649	8.348*10^3	8348.28	1.795*10^-2	0.017953
HSCB|121613|ES	2.36634	5.947*10^0	5.94736	1.358*10^0	1.35824	2.604*10^1	26.0419	1.797*10^-2	0.017965
RPL19|40632|ES	2.36548	1.925*10^1	19.249	1.660*10^0	1.6603	2.232*10^2	223.167	1.801*10^-2	0.0180067
UBE2J2|57|ES	2.36539	3.904*10^0	3.90364	1.263*10^0	1.26292	1.207*10^1	12.066	1.801*10^-2	0.0180113
CNOT4|81886|AT	-2.36525	1.066*10^-3	0.00106614	3.672*10^-6	3.67205e-06	3.095*10^-1	0.309542	1.802*10^-2	0.0180181
PRMT7|37225|ES	-2.36433	7.985*10^-3	0.00798528	1.457*10^-4	0.000145663	4.378*10^-1	0.437755	1.806*10^-2	0.0180626
ADCY5|66474|ES	2.36314	1.325*10^1	13.2495	1.554*10^0	1.55403	1.130*10^2	112.963	1.812*10^-2	0.0181206
SLC4A7|63781|ES	2.36277	1.372*10^1	13.7249	1.563*10^0	1.56287	1.205*10^2	120.531	1.814*10^-2	0.0181391
PTPRK|77497|ES	2.36107	1.246*10^1	12.4649	1.535*10^0	1.53512	1.012*10^2	101.213	1.822*10^-2	0.0182221
R3HCC1L|12757|ES	-2.36048	5.060*10^-7	5.06037e-07	2.996*10^-12	2.99641e-12	8.546*10^-2	0.08546	1.825*10^-2	0.0182515
CSAD|21955|RI	-2.36015	1.829*10^-1	0.182948	4.464*10^-2	0.0446412	7.498*10^-1	0.749755	1.827*10^-2	0.0182674
UBE2D3|70149|AD	-2.36001	9.538*10^-2	0.0953812	1.355*10^-2	0.0135493	6.714*10^-1	0.671444	1.827*10^-2	0.0182747
TAMM41|63411|ES	-2.35964	1.835*10^-1	0.183481	4.487*10^-2	0.0448661	7.504*10^-1	0.750354	1.829*10^-2	0.0182925
ST3GAL5|54385|AT	2.35899	5.105*10^4	51047.3	6.257*10^0	6.25685	4.165*10^8	4.16476e+08	1.832*10^-2	0.0183249
PPIL3|123770|ES	2.35868	4.221*10^0	4.22059	1.276*10^0	1.2756	1.396*10^1	13.9647	1.834*10^-2	0.0183402
PDCD5|48878|AP	2.35746	1.197*10^2	119.748	2.241*10^0	2.2409	6.399*10^3	6398.99	1.840*10^-2	0.0184004
PDCD5|48877|AP	-2.35746	8.351*10^-3	0.0083509	1.563*10^-4	0.000156275	4.463*10^-1	0.44625	1.840*10^-2	0.0184004
HOPX|69374|AD	-2.35699	6.742*10^-3	0.00674247	1.055*10^-4	0.000105528	4.308*10^-1	0.430796	1.842*10^-2	0.0184236
COPS7A|19958|AD	2.35634	1.220*10^1	12.1985	1.523*10^0	1.52312	9.770*10^1	97.6965	1.846*10^-2	0.018456
TCF7L2|13156|ES	2.35438	1.221*10^1	12.2079	1.521*10^0	1.52069	9.800*10^1	98.0038	1.855*10^-2	0.0185534
LONP2|36337|ES	-2.35393	8.344*10^-4	0.000834439	2.281*10^-6	2.28058e-06	3.053*10^-1	0.305312	1.858*10^-2	0.0185759
PPCS|2073|AT	2.35319	5.165*10^4	51654	6.132*10^0	6.13171	4.351*10^8	4.35137e+08	1.861*10^-2	0.0186129
PPCS|2074|AT	-2.35319	1.936*10^-5	1.93596e-05	2.298*10^-9	2.29813e-09	1.631*10^-1	0.163087	1.861*10^-2	0.0186129
PLEKHG3|27904|ES	2.35185	4.477*10^3	4476.69	4.058*10^0	4.05839	4.938*10^6	4.9381e+06	1.868*10^-2	0.0186803
MEF2B|48596|ES	2.35139	4.066*10^0	4.06619	1.263*10^0	1.26302	1.309*10^1	13.0908	1.870*10^-2	0.0187032
PET112|70844|AT	-2.3509	6.468*10^-4	0.00064679	1.419*10^-6	1.41862e-06	2.949*10^-1	0.29489	1.873*10^-2	0.0187283
SCHIP1|67466|AP	-2.35067	3.597*10^-2	0.0359716	2.249*10^-3	0.00224872	5.754*10^-1	0.575418	1.874*10^-2	0.0187394
KIF13A|75458|ES	2.35014	4.014*10^0	4.01412	1.260*10^0	1.25953	1.279*10^1	12.793	1.877*10^-2	0.0187666
TMEM91|50047|AA	2.34991	3.213*10^0	3.21266	1.214*10^0	1.2137	8.504*10^0	8.50392	1.878*10^-2	0.0187777
CLCN4|88459|ES	-2.34915	1.621*10^-8	1.62129e-08	5.132*10^-15	5.13226e-15	5.122*10^-2	0.0512165	1.882*10^-2	0.0188165
FMNL1|41953|AP	2.34865	3.405*10^0	3.4051	1.225*10^0	1.2248	9.467*10^0	9.46662	1.884*10^-2	0.0188415
ZDHHC7|37873|ES	2.34771	1.636*10^1	16.3633	1.587*10^0	1.58665	1.688*10^2	168.756	1.889*10^-2	0.0188893
POFUT2|60869|RI	-2.34666	1.832*10^-1	0.183164	4.438*10^-2	0.0443766	7.560*10^-1	0.756009	1.894*10^-2	0.0189426
S100A4|7713|AP	-2.34534	6.283*10^-2	0.062832	6.221*10^-3	0.00622071	6.346*10^-1	0.634631	1.901*10^-2	0.0190097
IQCJ-SCHIP1|67457|AP	-2.34519	2.844*10^-1	0.284403	9.944*10^-2	0.0994409	8.134*10^-1	0.813396	1.902*10^-2	0.0190174
GRIK2|77102|ES	-2.34383	5.541*10^-7	5.54138e-07	3.250*10^-12	3.25004e-12	9.448*10^-2	0.0944814	1.909*10^-2	0.0190869
UBXN11|101234|ES	2.34373	8.937*10^0	8.93714	1.431*10^0	1.43136	5.580*10^1	55.8017	1.909*10^-2	0.0190921
COMMD4|31852|ES	2.3426	6.240*10^4	62397.9	6.071*10^0	6.07074	6.414*10^8	6.41355e+08	1.915*10^-2	0.0191497
GGT5|61395|ES	-2.34233	2.252*10^-2	0.0225175	9.418*10^-4	0.00094184	5.383*10^-1	0.538349	1.916*10^-2	0.0191639
COPS7B|57950|AA	-2.34218	2.303*10^-6	2.30253e-06	4.410*10^-11	4.40987e-11	1.202*10^-1	0.120222	1.917*10^-2	0.0191716
HSPB11|3099|AT	-2.3414	1.343*10^-4	0.00013432	7.710*10^-8	7.70974e-08	2.340*10^-1	0.234014	1.921*10^-2	0.0192117
KCNIP3|54503|AP	-2.34102	3.616*10^-1	0.361565	1.543*10^-1	0.154272	8.474*10^-1	0.847391	1.923*10^-2	0.019231
RFFL|40228|AP	2.34099	7.165*10^0	7.1654	1.378*10^0	1.37784	3.726*10^1	37.2633	1.923*10^-2	0.0192329
ZNF195|13979|ES	2.34098	1.536*10^1	15.3618	1.560*10^0	1.55993	1.513*10^2	151.279	1.923*10^-2	0.0192331
CCT4|53708|ES	2.34049	1.256*10^2	125.598	2.194*10^0	2.19413	7.190*10^3	7189.63	1.926*10^-2	0.0192584
ANAPC5|24864|ES	-2.34045	2.253*10^-2	0.0225271	9.402*10^-4	0.000940176	5.398*10^-1	0.539763	1.926*10^-2	0.0192608
DZIP3|66036|ES	-2.34024	4.497*10^-5	4.49673e-05	1.028*10^-8	1.02841e-08	1.966*10^-1	0.196619	1.927*10^-2	0.0192715
CBWD5|86507|ES	-2.33838	2.099*10^-1	0.209873	5.671*10^-2	0.0567074	7.767*10^-1	0.776737	1.937*10^-2	0.0193676
S100A4|7711|AP	2.33793	1.576*10^1	15.7636	1.562*10^0	1.56178	1.591*10^2	159.108	1.939*10^-2	0.019391
RPGR|88807|ES	-2.33763	2.995*10^-1	0.299466	1.090*10^-1	0.108967	8.230*10^-1	0.822999	1.941*10^-2	0.0194065
CCDC74B|55277|RI	-2.33753	3.772*10^-1	0.377201	1.665*10^-1	0.166548	8.543*10^-1	0.854292	1.941*10^-2	0.0194115
DKK3|14407|AP	2.33681	3.338*10^0	3.33766	1.215*10^0	1.21454	9.172*10^0	9.17216	1.945*10^-2	0.0194493
EMR2|48029|AT	2.33594	2.818*10^1	28.1788	1.711*10^0	1.71146	4.640*10^2	463.958	1.949*10^-2	0.0194946
EMR2|48028|AT	-2.33594	3.549*10^-2	0.0354876	2.155*10^-3	0.00215537	5.843*10^-1	0.584296	1.949*10^-2	0.0194946
ECHDC1|77476|ES	-2.33517	2.974*10^-1	0.297371	1.075*10^-1	0.107455	8.229*10^-1	0.822945	1.953*10^-2	0.0195343
YAP1|18440|AP	2.33499	2.401*10^1	24.0101	1.666*10^0	1.66613	3.460*10^2	346.003	1.954*10^-2	0.0195438
YAP1|18441|AP	-2.33499	4.165*10^-2	0.0416491	2.890*10^-3	0.00289015	6.002*10^-1	0.600194	1.954*10^-2	0.0195438
ANKS3|33819|ES	2.33438	6.858*10^1	68.5754	1.970*10^0	1.97019	2.387*10^3	2386.87	1.958*10^-2	0.0195757
FAM193A|68587|ES	-2.33387	6.737*10^-2	0.0673725	6.993*10^-3	0.00699283	6.491*10^-1	0.649101	1.960*10^-2	0.0196025
EFHC1|76471|AT	2.33355	8.195*10^2	819.528	2.927*10^0	2.92717	2.294*10^5	229446	1.962*10^-2	0.0196191
DUS2|37177|ES	-2.33298	4.163*10^-2	0.0416328	2.881*10^-3	0.00288143	6.015*10^-1	0.601537	1.965*10^-2	0.019649
RPS27L|31015|AT	2.33254	2.012*10^3	2011.53	3.370*10^0	3.37033	1.201*10^6	1.20055e+06	1.967*10^-2	0.0196723
MED15|61161|AP	-2.33239	9.058*10^-3	0.00905817	1.739*10^-4	0.000173896	4.718*10^-1	0.471836	1.968*10^-2	0.0196803
SLC47A1|39745|ES	-2.3323	1.857*10^-2	0.0185709	6.517*10^-4	0.000651679	5.292*10^-1	0.529217	1.969*10^-2	0.0196851
RPS27L|31016|AT	-2.33204	4.982*10^-4	0.000498191	8.351*10^-7	8.35077e-07	2.972*10^-1	0.297211	1.970*10^-2	0.0196983
MCCC1|67769|AP	2.33203	8.451*10^1	84.5113	2.030*10^0	2.02968	3.519*10^3	3518.85	1.970*10^-2	0.0196993
SLC37A2|19257|ES	-2.33181	2.621*10^-2	0.0262129	1.228*10^-3	0.00122807	5.595*10^-1	0.55951	1.971*10^-2	0.0197109
CD276|31611|AT	2.33115	6.471*10^8	6.47141e+08	2.529*10^1	25.2904	1.656*10^16	1.65593e+16	1.975*10^-2	0.0197456
TMEM62|93660|ES	-2.33074	1.776*10^-1	0.177566	4.151*10^-2	0.041508	7.596*10^-1	0.759603	1.977*10^-2	0.0197669
ARPC4|63188|AD	-2.33026	1.919*10^-3	0.0019191	9.952*10^-6	9.95246e-06	3.701*10^-1	0.370054	1.979*10^-2	0.0197925
HPS5|14593|ES	-2.33015	1.308*10^-1	0.130773	2.363*10^-2	0.023626	7.238*10^-1	0.723843	1.980*10^-2	0.0197984
EFCAB4A|13776|ES	-2.32952	2.823*10^-1	0.282297	9.740*10^-2	0.0973985	8.182*10^-1	0.8182	1.983*10^-2	0.0198315
DRAM1|24006|ES	2.3288	4.303*10^5	430317	7.803*10^0	7.80347	2.373*10^10	2.37296e+10	1.987*10^-2	0.0198695
CDK10|38119|ES	2.32761	5.913*10^0	5.91257	1.324*10^0	1.32405	2.640*10^1	26.4027	1.993*10^-2	0.0199326
ABCD4|28383|ES	2.32664	3.122*10^7	3.12192e+07	1.517*10^1	15.1748	6.423*10^13	6.42273e+13	1.998*10^-2	0.0199842
BTN2A2|75642|AA	2.32505	3.139*10^2	313.856	2.466*10^0	2.46626	3.994*10^4	39941.2	2.007*10^-2	0.0200696
TOR2A|87658|ES	2.32462	8.894*10^1	88.9446	2.022*10^0	2.02186	3.913*10^3	3912.8	2.009*10^-2	0.0200924
CBR4|71137|AT	2.32444	9.607*10^4	96067.3	6.043*10^0	6.0434	1.527*10^9	1.52711e+09	2.010*10^-2	0.0201018
OFD1|88522|ES	-2.32443	1.415*10^-1	0.141467	2.719*10^-2	0.0271949	7.359*10^-1	0.73591	2.010*10^-2	0.0201025
NDRG2|26485|AP	2.32439	9.384*10^0	9.3844	1.421*10^0	1.42056	6.199*10^1	61.9948	2.010*10^-2	0.0201045
POLL|12897|RI	-2.32391	1.357*10^-1	0.135696	2.518*10^-2	0.0251758	7.314*10^-1	0.731393	2.013*10^-2	0.0201301
SYTL2|18148|ES	2.3232	3.805*10^0	3.8055	1.232*10^0	1.23239	1.175*10^1	11.751	2.017*10^-2	0.0201683
ABCG2|69881|AP	-2.3231	2.812*10^-1	0.2812	9.642*10^-2	0.0964179	8.201*10^-1	0.820109	2.017*10^-2	0.0201735
RHBDL1|32947|AP	2.32257	2.478*10^0	2.47768	1.152*10^0	1.15218	5.328*10^0	5.32808	2.020*10^-2	0.0202024
CMC2|37706|ES	-2.32199	1.979*10^-2	0.0197912	7.220*10^-4	0.000722007	5.425*10^-1	0.542502	2.023*10^-2	0.0202337
PTHLH|20910|AD	2.32066	2.244*10^1	22.4357	1.622*10^0	1.62171	3.104*10^2	310.388	2.031*10^-2	0.0203052
TAGLN3|66073|AP	-2.32025	3.110*10^-2	0.0311013	1.658*10^-3	0.00165806	5.834*10^-1	0.583388	2.033*10^-2	0.0203271
GSN|87421|AP	-2.31982	1.518*10^-2	0.015176	4.410*10^-4	0.000441018	5.222*10^-1	0.522228	2.035*10^-2	0.0203509
WDR33|55244|AT	2.31911	1.421*10^1	14.2058	1.508*10^0	1.50825	1.338*10^2	133.8	2.039*10^-2	0.0203892
FBXO45|68253|AD	2.31859	3.763*10^1	37.6271	1.753*10^0	1.75263	8.078*10^2	807.811	2.042*10^-2	0.0204171
ABCG2|69880|AP	2.31856	3.548*10^0	3.5482	1.216*10^0	1.21637	1.035*10^1	10.3502	2.042*10^-2	0.0204188
MSL3|88485|AP	-2.3172	1.548*10^-1	0.154843	3.196*10^-2	0.0319648	7.501*10^-1	0.750082	2.049*10^-2	0.020493
AKR1C2|10651|AT	2.31586	5.420*10^0	5.42024	1.297*10^0	1.29659	2.266*10^1	22.6587	2.057*10^-2	0.020566
PTMS|293238|ES	-2.31544	2.931*10^-1	0.293104	1.037*10^-1	0.103721	8.283*10^-1	0.828275	2.059*10^-2	0.0205888
MUTYH|2653|ES	2.3146	4.355*10^0	4.35519	1.253*10^0	1.25287	1.514*10^1	15.1394	2.064*10^-2	0.020635
SIMC1|74636|AT	2.31434	2.949*10^0	2.94874	1.180*10^0	1.18008	7.368*10^0	7.36817	2.065*10^-2	0.0206489
SLC25A23|47042|ES	-2.31383	1.118*10^-1	0.111774	1.747*10^-2	0.0174674	7.152*10^-1	0.715249	2.068*10^-2	0.0206769
TMEM51|738|AA	2.3134	3.310*10^3	3310.29	3.449*10^0	3.44949	3.177*10^6	3.1767e+06	2.070*10^-2	0.0207008
ATG4D|47534|ES	2.31281	4.021*10^0	4.02135	1.237*10^0	1.23653	1.308*10^1	13.078	2.073*10^-2	0.0207332
SERPINI1|67564|AD	2.31217	2.375*10^1	23.7469	1.620*10^0	1.6201	3.481*10^2	348.075	2.077*10^-2	0.0207684
SIMC1|74635|AT	-2.31211	3.395*10^-1	0.339494	1.359*10^-1	0.135869	8.483*10^-1	0.848289	2.077*10^-2	0.0207718
GOLGA4|63983|ES	2.31206	6.112*10^2	611.224	2.656*10^0	2.65642	1.406*10^5	140638	2.077*10^-2	0.0207746
ETV7|75971|AT	2.31203	5.453*10^0	5.45264	1.295*10^0	1.29469	2.296*10^1	22.964	2.078*10^-2	0.0207761
TAGLN3|66074|AP	2.31171	3.196*10^1	31.9629	1.694*10^0	1.69413	6.030*10^2	603.041	2.079*10^-2	0.0207934
HSD17B7|8754|AT	-2.31159	3.299*10^-3	0.00329852	2.595*10^-5	2.59498e-05	4.193*10^-1	0.419281	2.080*10^-2	0.0208005
PAPD4|72635|AA	-2.3113	1.003*10^-1	0.100295	1.427*10^-2	0.0142683	7.050*10^-1	0.704992	2.082*10^-2	0.020816
ETV7|75972|AT	-2.31124	1.827*10^-1	0.182668	4.321*10^-2	0.0432058	7.723*10^-1	0.772292	2.082*10^-2	0.0208194
ALG1|33876|AP	2.31001	1.329*10^4	13289.3	4.215*10^0	4.21548	4.189*10^7	4.18948e+07	2.089*10^-2	0.0208878
SPHK1|43581|AP	-2.30978	1.888*10^-1	0.188759	4.586*10^-2	0.0458647	7.768*10^-1	0.77685	2.090*10^-2	0.0209005
HCFC1|90542|AA	2.30956	3.478*10^1	34.7765	1.711*10^0	1.71121	7.068*10^2	706.757	2.091*10^-2	0.0209126
EXOC7|43566|ES	2.30896	5.823*10^0	5.82251	1.305*10^0	1.30511	2.598*10^1	25.9761	2.095*10^-2	0.0209456
TMUB2|41813|ES	-2.30856	1.200*10^-1	0.12003	1.984*10^-2	0.0198431	7.261*10^-1	0.726057	2.097*10^-2	0.0209679
PGS1|43874|AA	-2.30856	1.218*10^-6	1.21765e-06	1.159*10^-11	1.15914e-11	1.279*10^-1	0.127911	2.097*10^-2	0.0209681
AP1M1|48147|ES	2.30821	4.549*10^6	4.54871e+06	1.010*10^1	10.1043	2.048*10^12	2.04772e+12	2.099*10^-2	0.0209872
RASGRP1|29927|ES	2.3081	4.571*10^2	457.113	2.519*10^0	2.51894	8.295*10^4	82952.4	2.099*10^-2	0.0209935
HDAC7|21377|ES	-2.307	1.397*10^-5	1.39653e-05	1.048*10^-9	1.04814e-09	1.861*10^-1	0.186071	2.105*10^-2	0.0210547
MFF|123476|ES	2.30616	4.635*10^0	4.63503	1.259*10^0	1.25889	1.707*10^1	17.0654	2.110*10^-2	0.0211014
TMEM173|73614|ES	-2.3049	1.555*10^-2	0.0155505	4.509*10^-4	0.000450923	5.363*10^-1	0.536273	2.117*10^-2	0.021172
ARHGAP4|90522|AP	-2.3033	2.908*10^-2	0.0290759	1.432*10^-3	0.0014325	5.902*10^-1	0.590164	2.126*10^-2	0.0212622
GAMT|46472|AT	2.303	1.300*10^5	129990	5.777*10^0	5.7774	2.925*10^9	2.92476e+09	2.128*10^-2	0.0212787
GAMT|46473|AT	-2.303	7.693*10^-6	7.69288e-06	3.419*10^-10	3.41908e-10	1.731*10^-1	0.173088	2.128*10^-2	0.0212787
PDPN|712|AP	-2.30275	5.998*10^-2	0.0599769	5.469*10^-3	0.00546861	6.578*10^-1	0.657796	2.129*10^-2	0.0212929
MSL3|88484|AP	2.30274	6.532*10^0	6.53208	1.322*10^0	1.32228	3.227*10^1	32.2685	2.129*10^-2	0.0212937
LARP1B|70571|ES	2.30226	9.523*10^1	95.2308	1.969*10^0	1.9688	4.606*10^3	4606.31	2.132*10^-2	0.0213205
GDA|86587|AT	2.30213	2.863*10^8	2.86281e+08	1.807*10^1	18.0695	4.536*10^15	4535652469884030	2.133*10^-2	0.0213276
UBXN11|1256|ES	2.30151	3.116*10^0	3.11561	1.184*10^0	1.1837	8.201*10^0	8.20053	2.136*10^-2	0.0213626
SLC2A11|61341|AT	-2.2993	1.528*10^-2	0.0152822	4.329*10^-4	0.000432869	5.395*10^-1	0.539532	2.149*10^-2	0.0214878
ASB8|21432|AT	2.29926	7.599*10^5	759897	7.376*10^0	7.37569	7.829*10^10	7.82901e+10	2.149*10^-2	0.0214903
MATR3|73587|ES	-2.29882	2.524*10^-1	0.252422	7.805*10^-2	0.078052	8.163*10^-1	0.816341	2.152*10^-2	0.0215153
KLHL7|78947|AP	-2.29856	2.898*10^-3	0.00289775	1.986*10^-5	1.98599e-05	4.228*10^-1	0.42281	2.153*10^-2	0.0215302
AMOTL2|66867|AA	-2.29854	5.340*10^-2	0.0534027	4.391*10^-3	0.00439092	6.495*10^-1	0.649488	2.153*10^-2	0.0215313
KLHL7|78948|AP	2.29848	3.450*10^2	344.983	2.365*10^0	2.36464	5.033*10^4	50330.3	2.153*10^-2	0.0215343
NBPF10|4446|ES	2.297	7.595*10^1	75.9534	1.888*10^0	1.88768	3.056*10^3	3056.09	2.162*10^-2	0.021619
ILDR2|8833|ES	-2.2966	2.974*10^-8	2.97399e-08	1.122*10^-14	1.12185e-14	7.884*10^-2	0.078839	2.164*10^-2	0.0216416
SUMF2|79786|ES	2.29658	4.262*10^0	4.26173	1.237*10^0	1.23675	1.469*10^1	14.6855	2.164*10^-2	0.0216425
WIPF2|40854|AD	-2.29642	2.899*10^-3	0.00289888	1.978*10^-5	1.97822e-05	4.248*10^-1	0.424802	2.165*10^-2	0.0216521
DDX58|86062|ES	2.29629	8.257*10^2	825.678	2.674*10^0	2.67432	2.549*10^5	254922	2.166*10^-2	0.0216591
CDKL3|73370|AT	-2.29585	1.464*10^-2	0.01464	3.976*10^-4	0.000397621	5.390*10^-1	0.539032	2.168*10^-2	0.0216843
VEGFA|76336|ES	2.29567	2.230*10^1	22.2955	1.575*10^0	1.57454	3.157*10^2	315.703	2.169*10^-2	0.0216949
TFE3|89056|AA	2.29461	1.795*10^1	17.9508	1.524*10^0	1.52368	2.115*10^2	211.482	2.176*10^-2	0.0217557
AGPAT4|78373|ES	-2.29448	3.738*10^-2	0.0373777	2.256*10^-3	0.00225595	6.193*10^-1	0.619293	2.176*10^-2	0.0217627
BTBD10|14452|AA	-2.29366	3.574*10^-5	3.57354e-05	5.664*10^-9	5.66439e-09	2.254*10^-1	0.225447	2.181*10^-2	0.0218103
PLBD2|24643|ES	2.29348	9.940*10^9	9.93969e+09	2.843*10^1	28.4314	3.475*10^18	3.47494e+18	2.182*10^-2	0.0218206
PLXDC1|40621|ES	2.29342	3.347*10^1	33.4694	1.666*10^0	1.66602	6.724*10^2	672.378	2.182*10^-2	0.0218236
ZNF83|51477|AP	2.29334	6.950*10^0	6.95007	1.326*10^0	1.32555	3.644*10^1	36.4403	2.183*10^-2	0.0218286
ZSCAN18|52401|AT	2.29264	6.506*10^24	6.50623e+24	3.986*10^3	3986.16	1.062*10^46	1.06195e+46	2.187*10^-2	0.0218688
ZNF83|51506|ES	-2.29198	2.475*10^-1	0.247476	7.498*10^-2	0.0749757	8.169*10^-1	0.816858	2.191*10^-2	0.0219066
GRIA1|125279|ME	2.29188	3.240*10^0	3.23981	1.186*10^0	1.18559	8.853*10^0	8.85328	2.191*10^-2	0.0219124
OS9|22697|AA	-2.2916	8.335*10^-4	0.000833533	1.938*10^-6	1.9384e-06	3.584*10^-1	0.358428	2.193*10^-2	0.0219288
AGPAT3|60798|AP	-2.29016	2.023*10^-1	0.202294	5.153*10^-2	0.0515262	7.942*10^-1	0.794212	2.201*10^-2	0.0220121
COQ2|69776|AT	2.28985	6.469*10^3	6469.08	3.540*10^0	3.54008	1.182*10^7	1.18215e+07	2.203*10^-2	0.0220297
SMIM7|48187|RI	-2.28974	4.187*10^-4	0.000418676	5.374*10^-7	5.37384e-07	3.262*10^-1	0.32619	2.204*10^-2	0.0220363
SERP2|25777|AP	-2.28841	8.232*10^-2	0.0823153	9.697*10^-3	0.00969654	6.988*10^-1	0.698786	2.211*10^-2	0.0221138
SIGLEC10|51335|ES	2.28824	2.697*10^2	269.712	2.232*10^0	2.23223	3.259*10^4	32588.4	2.212*10^-2	0.0221238
IFI27L1|29056|AD	-2.28805	4.389*10^-2	0.0438882	3.016*10^-3	0.00301558	6.387*10^-1	0.638741	2.213*10^-2	0.0221346
GCHFR|30032|AT	2.28761	4.299*10^0	4.29926	1.232*10^0	1.2323	1.500*10^1	14.9992	2.216*10^-2	0.0221604
GCHFR|30033|AT	-2.28761	2.326*10^-1	0.232598	6.667*10^-2	0.0666701	8.115*10^-1	0.811488	2.216*10^-2	0.0221604
RGS10|13263|AP	-2.28623	9.068*10^-2	0.0906833	1.158*10^-2	0.0115831	7.100*10^-1	0.709953	2.224*10^-2	0.0222408
ACOT8|59628|ES	2.28615	2.298*10^1	22.9795	1.564*10^0	1.56399	3.376*10^2	337.637	2.225*10^-2	0.0222458
C2CD5|20731|AP	2.28422	1.254*10^1	12.5436	1.432*10^0	1.43194	1.099*10^2	109.881	2.236*10^-2	0.0223588
TANGO2|61112|AP	2.28296	7.205*10^0	7.20509	1.322*10^0	1.32233	3.926*10^1	39.2588	2.243*10^-2	0.0224325
ACAP1|38923|AD	-2.28205	1.553*10^-1	0.155288	3.136*10^-2	0.0313644	7.688*10^-1	0.768844	2.249*10^-2	0.0224864
ISYNA1|48436|ES	-2.2818	3.173*10^-7	3.1725e-07	8.306*10^-13	8.30611e-13	1.212*10^-1	0.121173	2.250*10^-2	0.0225011
PIK3R2|48398|AT	2.28128	1.672*10^2	167.19	2.057*10^0	2.05655	1.359*10^4	13592	2.253*10^-2	0.0225317
PIK3R2|48396|AT	-2.28108	5.985*10^-3	0.00598467	7.362*10^-5	7.36229e-05	4.865*10^-1	0.486482	2.254*10^-2	0.0225438
WDR91|81880|AP	2.28061	7.927*10^4	79268.3	4.884*10^0	4.88426	1.286*10^9	1.28647e+09	2.257*10^-2	0.0225715
KRIT1|80430|RI	-2.28016	6.508*10^-3	0.00650757	8.588*10^-5	8.58798e-05	4.931*10^-1	0.493112	2.260*10^-2	0.0225983
ISG20|32392|AT	2.27839	6.143*10^1	61.4296	1.778*10^0	1.77805	2.122*10^3	2122.33	2.270*10^-2	0.0227033
SERP2|25778|AP	2.27797	1.201*10^1	12.0071	1.415*10^0	1.41479	1.019*10^2	101.902	2.273*10^-2	0.0227282
PDPN|710|AP	2.27567	1.591*10^1	15.9082	1.468*10^0	1.46792	1.724*10^2	172.401	2.287*10^-2	0.0228657
PPIL2|61239|AA	2.2754	9.785*10^0	9.78497	1.372*10^0	1.37189	6.979*10^1	69.7911	2.288*10^-2	0.0228821
SEPT10|54912|ES	2.27484	5.974*10^8	5.97376e+08	1.640*10^1	16.3979	2.176*10^16	2.17625e+16	2.292*10^-2	0.0229154
PSMD13|13629|ES	-2.27275	2.754*10^-1	0.275361	9.055*10^-2	0.0905495	8.374*10^-1	0.837371	2.304*10^-2	0.0230415
SNCAIP|73106|ES	-2.27259	7.015*10^-4	0.000701493	1.336*10^-6	1.33634e-06	3.682*10^-1	0.368238	2.305*10^-2	0.023051
ZNF438|11130|AT	-2.27254	5.586*10^-8	5.58604e-08	3.103*10^-14	3.10325e-14	1.006*10^-1	0.100552	2.305*10^-2	0.0230537
PSPH|79780|ES	-2.27182	1.260*10^-2	0.0126003	2.894*10^-4	0.00028942	5.486*10^-1	0.548574	2.310*10^-2	0.0230972
PCBP4|100547|ES	2.26985	4.044*10^0	4.04369	1.210*10^0	1.21015	1.351*10^1	13.5119	2.322*10^-2	0.0232168
FAM86B1|82706|ES	2.26871	4.430*10^0	4.4304	1.225*10^0	1.22454	1.603*10^1	16.0293	2.329*10^-2	0.0232862
FCHSD1|73816|AT	2.26853	5.070*10^2	507.042	2.333*10^0	2.33312	1.102*10^5	110192	2.330*10^-2	0.0232972
GNPDA1|73863|RI	-2.26825	1.534*10^-1	0.153411	3.036*10^-2	0.0303647	7.751*10^-1	0.77508	2.331*10^-2	0.0233139
CCDC25|83179|ES	2.26742	2.661*10^1	26.6102	1.560*10^0	1.56039	4.538*10^2	453.798	2.336*10^-2	0.0233645
USP19|64835|AA	-2.26721	1.197*10^-1	0.1197	1.910*10^-2	0.019104	7.500*10^-1	0.750008	2.338*10^-2	0.0233774
DCAF5|28120|AP	2.26638	6.165*10^0	6.16479	1.279*10^0	1.27878	2.972*10^1	29.7195	2.343*10^-2	0.0234284
PKP4|55685|ES	2.26578	3.834*10^1	38.3401	1.636*10^0	1.63587	8.986*10^2	898.578	2.346*10^-2	0.0234647
ZNF268|25372|ES	-2.26539	4.710*10^-5	4.7096e-05	8.499*10^-9	8.49878e-09	2.610*10^-1	0.260983	2.349*10^-2	0.0234885
RBMS1|55724|AP	2.26512	4.919*10^0	4.9191	1.239*10^0	1.23939	1.952*10^1	19.5237	2.351*10^-2	0.0235055
TAX1BP1|79060|AD	-2.26494	7.542*10^-3	0.00754237	1.099*10^-4	0.000109853	5.179*10^-1	0.517851	2.352*10^-2	0.0235163
RIPK2|84385|ES	2.26455	6.058*10^0	6.05763	1.274*10^0	1.27415	2.880*10^1	28.7995	2.354*10^-2	0.0235404
PRPSAP2|39670|ES	-2.26415	7.809*10^-2	0.0780902	8.590*10^-3	0.00858958	7.099*10^-1	0.709938	2.356*10^-2	0.0235648
CFI|70339|AT	2.26411	2.332*10^2	233.221	2.080*10^0	2.08003	2.615*10^4	26149.6	2.357*10^-2	0.0235675
URGCP|79353|AP	2.26336	1.024*10^1	10.2375	1.366*10^0	1.36589	7.673*10^1	76.731	2.361*10^-2	0.0236133
SMIM7|48198|ES	2.26309	4.550*10^2	454.996	2.270*10^0	2.26998	9.120*10^4	91199.4	2.363*10^-2	0.0236301
RNF19B|1646|AA	2.26308	1.043*10^2	104.317	1.864*10^0	1.86355	5.839*10^3	5839.46	2.363*10^-2	0.0236306
COPE|48516|ES	2.26294	7.814*10^1	78.1359	1.792*10^0	1.79237	3.406*10^3	3406.22	2.364*10^-2	0.0236392
PROM2|54496|AA	-2.26219	8.099*10^-2	0.0809931	9.178*10^-3	0.00917755	7.148*10^-1	0.714775	2.369*10^-2	0.0236856
COX18|69478|ES	2.26206	6.588*10^3	6588.04	3.236*10^0	3.23588	1.341*10^7	1.34128e+07	2.369*10^-2	0.0236937
PABPN1|26731|RI	-2.26191	1.718*10^-1	0.171842	3.736*10^-2	0.0373564	7.905*10^-1	0.790489	2.370*10^-2	0.0237028
ELMOD3|54216|ES	2.26151	1.735*10^1	17.3516	1.463*10^0	1.46302	2.058*10^2	205.793	2.373*10^-2	0.0237279
DZIP1|26124|ES	-2.26091	7.810*10^-4	0.000781048	1.581*10^-6	1.5811e-06	3.858*10^-1	0.385829	2.377*10^-2	0.0237651
UBE2C|59611|AD	2.25945	5.325*10^2	532.461	2.298*10^0	2.29805	1.234*10^5	123372	2.386*10^-2	0.0238557
TRMU|62711|AA	-2.25828	2.218*10^-1	0.22182	6.003*10^-2	0.0600338	8.196*10^-1	0.819609	2.393*10^-2	0.023928
ARHGAP12|11155|ES	-2.25782	1.063*10^-1	0.106275	1.518*10^-2	0.0151808	7.440*10^-1	0.743986	2.396*10^-2	0.0239569
MFSD11|43690|AD	-2.25772	2.411*10^-1	0.24106	7.010*10^-2	0.0701034	8.289*10^-1	0.828918	2.396*10^-2	0.0239629
EP400NL|25252|ES	-2.25567	2.072*10^-1	0.207175	5.276*10^-2	0.0527592	8.135*10^-1	0.813531	2.409*10^-2	0.024091
CCNT2|55414|ES	2.25564	3.567*10^1	35.6658	1.598*10^0	1.59762	7.962*10^2	796.214	2.409*10^-2	0.0240931
MTFP1|61749|ES	2.25467	3.003*10^0	3.00257	1.155*10^0	1.15455	7.809*10^0	7.80862	2.415*10^-2	0.0241541
PPIL2|61238|RI	2.25376	1.156*10^2	115.644	1.858*10^0	1.85758	7.199*10^3	7199.48	2.421*10^-2	0.024211
TRIP12|57856|ES	-2.25226	1.428*10^-1	0.142849	2.627*10^-2	0.0262685	7.768*10^-1	0.77682	2.431*10^-2	0.0243058
SLC37A3|81987|AA	-2.25068	7.674*10^-2	0.0767375	8.204*10^-3	0.00820423	7.178*10^-1	0.717756	2.441*10^-2	0.0244056
TSR1|38389|ES	2.2506	2.446*10^2	244.631	2.034*10^0	2.03446	2.942*10^4	29415.2	2.441*10^-2	0.0244106
TMEM41A|68011|AT	2.25044	7.673*10^3	7672.91	3.173*10^0	3.17288	1.856*10^7	1.85552e+07	2.442*10^-2	0.024421
HEXA|31540|AT	2.25021	4.553*10^1	45.5335	1.636*10^0	1.63644	1.267*10^3	1266.96	2.444*10^-2	0.0244358
HMOX2|33742|AP	2.24999	3.731*10^0	3.73065	1.185*10^0	1.18496	1.175*10^1	11.7453	2.445*10^-2	0.0244494
SEMA6D|30461|AP	2.24883	6.787*10^0	6.78677	1.279*10^0	1.27888	3.602*10^1	36.0162	2.452*10^-2	0.0245234
FAM182B|58879|AP	-2.24848	2.055*10^-1	0.205504	5.174*10^-2	0.051739	8.163*10^-1	0.816251	2.455*10^-2	0.0245456
MORN1|254|AT	2.24819	4.170*10^0	4.16973	1.201*10^0	1.20088	1.448*10^1	14.4783	2.456*10^-2	0.0245644
ARNTL|14444|ES	2.24795	9.963*10^0	9.96286	1.342*10^0	1.34247	7.394*10^1	73.9375	2.458*10^-2	0.0245794
ACAD9|66671|ES	-2.24679	5.719*10^-3	0.00571939	6.324*10^-5	6.32409e-05	5.173*10^-1	0.517251	2.465*10^-2	0.0246534
KHDRBS3|85269|AP	2.24558	5.064*10^1	50.6424	1.647*10^0	1.6474	1.557*10^3	1556.79	2.473*10^-2	0.0247309
KHDRBS3|85270|AP	-2.24558	1.975*10^-2	0.0197465	6.424*10^-4	0.000642358	6.070*10^-1	0.607021	2.473*10^-2	0.024731
PARD3|11216|ES	-2.24431	1.245*10^-1	0.12449	2.018*10^-2	0.0201797	7.680*10^-1	0.76799	2.481*10^-2	0.0248122
GNB2L1|75066|AD	2.24312	5.741*10^0	5.74059	1.247*10^0	1.24682	2.643*10^1	26.4307	2.489*10^-2	0.0248892
TVP23C|39360|ES	-2.24273	1.755*10^-4	0.000175464	9.161*10^-8	9.16051e-08	3.361*10^-1	0.33609	2.491*10^-2	0.0249139
YAF2|21115|ES	-2.24266	2.585*10^-1	0.258505	7.925*10^-2	0.0792496	8.432*10^-1	0.843218	2.492*10^-2	0.0249188
CYB561D1|4017|AA	-2.24262	6.912*10^-2	0.0691189	6.690*10^-3	0.00669033	7.141*10^-1	0.714079	2.492*10^-2	0.0249216
IQCJ-SCHIP1|67458|AP	2.24208	3.593*10^0	3.59288	1.175*10^0	1.1746	1.099*10^1	10.9899	2.496*10^-2	0.0249561
ARFGAP1|60112|ES	2.24092	2.751*10^1	27.5056	1.515*10^0	1.51519	4.993*10^2	499.316	2.503*10^-2	0.0250313
CNIH2|17000|RI	-2.2397	5.753*10^-2	0.0575277	4.728*10^-3	0.00472763	7.000*10^-1	0.700019	2.511*10^-2	0.0251104
PRKD2|50579|AP	-2.23894	1.100*10^-1	0.110023	1.594*10^-2	0.0159368	7.596*10^-1	0.759567	2.516*10^-2	0.0251596
ZNF397|45143|AT	2.23869	1.830*10^1	18.2974	1.436*10^0	1.43607	2.331*10^2	233.134	2.518*10^-2	0.0251758
ALDOA|36035|AP	2.23758	2.836*10^3	2836.42	2.682*10^0	2.68158	3.000*10^6	3.0002e+06	2.525*10^-2	0.0252482
PHLDB1|19034|AP	2.23664	2.906*10^0	2.90614	1.141*10^0	1.14107	7.401*10^0	7.4015	2.531*10^-2	0.0253097
APOL3|61994|ES	-2.23472	1.965*10^-1	0.196466	4.715*10^-2	0.0471478	8.187*10^-1	0.818676	2.544*10^-2	0.0254361
AKR1C2|10650|AT	-2.2344	1.994*10^-1	0.19943	4.848*10^-2	0.0484821	8.203*10^-1	0.820348	2.546*10^-2	0.0254568
ASPH|83969|AT	-2.23436	6.297*10^-2	0.0629732	5.569*10^-3	0.00556906	7.121*10^-1	0.712081	2.546*10^-2	0.0254596
MYEF2|30483|ES	2.23343	1.420*10^2	141.98	1.835*10^0	1.83453	1.099*10^4	10988.3	2.552*10^-2	0.0255205
METTL22|33899|AA	-2.23322	2.648*10^-8	2.64787e-08	5.928*10^-15	5.9282e-15	1.183*10^-1	0.118269	2.553*10^-2	0.0255345
GLI4|85407|RI	-2.23312	6.056*10^-2	0.0605563	5.168*10^-3	0.00516755	7.096*10^-1	0.709633	2.554*10^-2	0.0255411
DMD|88766|AP	2.23299	3.080*10^0	3.07957	1.147*10^0	1.14743	8.265*10^0	8.26521	2.555*10^-2	0.0255495
GUSB|79862|ES	-2.23272	1.428*10^-1	0.142836	2.588*10^-2	0.0258775	7.884*10^-1	0.78841	2.557*10^-2	0.0255673
KLHL5|69042|AT	-2.23265	1.155*10^-4	0.000115488	4.036*10^-8	4.03622e-08	3.304*10^-1	0.330444	2.557*10^-2	0.0255721
NAPEPLD|81167|AP	-2.2324	1.038*10^-1	0.103832	1.421*10^-2	0.0142136	7.585*10^-1	0.758497	2.559*10^-2	0.0255883
ZNF195|13972|ES	2.23186	9.978*10^0	9.97764	1.323*10^0	1.32345	7.522*10^1	75.2225	2.562*10^-2	0.025624
NLE1|40283|RI	2.23049	2.902*10^0	2.90217	1.138*10^0	1.13795	7.402*10^0	7.40157	2.571*10^-2	0.0257147
SENP6|76795|ES	2.23045	1.067*10^4	10667.7	3.080*10^0	3.07956	3.695*10^7	3.6953e+07	2.572*10^-2	0.0257173
IRF5|81733|AA	-2.23023	1.841*10^-1	0.184095	4.161*10^-2	0.0416052	8.146*10^-1	0.814581	2.573*10^-2	0.0257319
ST7L|4210|ES	-2.23008	8.769*10^-2	0.0876949	1.033*10^-2	0.0103272	7.447*10^-1	0.744676	2.574*10^-2	0.0257419
FAM192A|36536|AD	-2.22844	8.348*10^-3	0.00834757	1.240*10^-4	0.00012403	5.618*10^-1	0.561816	2.585*10^-2	0.0258511
SSB|55882|AP	-2.22768	4.195*10^-5	4.19467e-05	5.908*10^-9	5.90818e-09	2.978*10^-1	0.297812	2.590*10^-2	0.0259016
TSPAN17|74677|ES	2.22557	1.228*10^4	12281.3	3.076*10^0	3.0763	4.903*10^7	4.90297e+07	2.604*10^-2	0.0260427
DNASE1L1|90573|AP	-2.22488	1.261*10^-1	0.126093	2.035*10^-2	0.0203453	7.815*10^-1	0.781484	2.609*10^-2	0.0260894
SLC25A26|65542|AT	-2.22473	4.498*10^-2	0.0449846	2.927*10^-3	0.00292702	6.914*10^-1	0.691356	2.610*10^-2	0.0260995
SLC25A26|65543|AT	2.22473	2.223*10^1	22.2298	1.446*10^0	1.44643	3.416*10^2	341.644	2.610*10^-2	0.0260995
AURKAIP1|148|RI	2.22462	5.448*10^0	5.44773	1.223*10^0	1.22345	2.426*10^1	24.2575	2.611*10^-2	0.0261066
DDX19B|37361|ES	2.22417	1.274*10^2	127.403	1.779*10^0	1.77856	9.126*10^3	9126.2	2.614*10^-2	0.0261373
HS2ST1|3691|AT	-2.22357	1.642*10^-2	0.0164205	4.389*10^-4	0.000438875	6.144*10^-1	0.614371	2.618*10^-2	0.0261772
MEF2BNB|48605|ES	2.22306	4.416*10^1	44.1564	1.566*10^0	1.56561	1.245*10^3	1245.39	2.621*10^-2	0.0262117
MAGI2|80217|ES	-2.22303	2.444*10^-1	0.244436	7.059*10^-2	0.0705885	8.464*10^-1	0.846443	2.621*10^-2	0.0262138
MFN1|67692|ES	2.22202	1.267*10^9	1.26653e+09	1.184*10^1	11.8447	1.354*10^17	1.35427e+17	2.628*10^-2	0.026282
PDCD10|67548|AP	-2.22143	4.424*10^-6	4.42439e-06	8.354*10^-11	8.35424e-11	2.343*10^-1	0.234315	2.632*10^-2	0.0263216
GRTP1|26373|AT	-2.22093	1.691*10^-1	0.169127	3.525*10^-2	0.0352464	8.115*10^-1	0.811546	2.636*10^-2	0.0263558
FANCA|38146|RI	-2.22	1.993*10^-1	0.199286	4.797*10^-2	0.047974	8.278*10^-1	0.82784	2.642*10^-2	0.0264191
GRTP1|26372|AT	2.21982	5.906*10^0	5.90591	1.231*10^0	1.23108	2.833*10^1	28.3326	2.643*10^-2	0.0264311
SMAD7|45461|AA	-2.21849	3.864*10^-2	0.0386385	2.181*10^-3	0.00218122	6.845*10^-1	0.684452	2.652*10^-2	0.0265215
CPNE1|59205|AD	-2.21845	8.151*10^-2	0.08151	8.898*10^-3	0.00889786	7.467*10^-1	0.746683	2.652*10^-2	0.0265239
HKDC1|11984|AT	2.21778	1.896*10^1	18.9612	1.408*10^0	1.40784	2.554*10^2	255.376	2.657*10^-2	0.0265697
MRPL55|10079|RI	-2.2176	9.192*10^-2	0.0919189	1.115*10^-2	0.011149	7.578*10^-1	0.757831	2.658*10^-2	0.0265824
FNTA|83758|ES	2.21699	3.766*10^0	3.766	1.166*10^0	1.16618	1.216*10^1	12.1618	2.662*10^-2	0.0266237
LINGO1|31992|AP	2.21696	5.045*10^0	5.04491	1.206*10^0	1.20636	2.110*10^1	21.0975	2.663*10^-2	0.0266259
GRSF1|69454|AD	-2.21619	1.435*10^-1	0.143539	2.579*10^-2	0.0257871	7.990*10^-1	0.798976	2.668*10^-2	0.0266787
TBC1D5|63663|ES	-2.21343	1.330*10^-1	0.133008	2.229*10^-2	0.0222886	7.937*10^-1	0.793732	2.687*10^-2	0.0268682
ACOX3|68766|AP	2.21326	5.041*10^0	5.0413	1.203*10^0	1.20338	2.112*10^1	21.1195	2.688*10^-2	0.0268796
LRRC23|20002|ES	2.21273	2.161*10^1	21.6053	1.421*10^0	1.42053	3.286*10^2	328.601	2.692*10^-2	0.0269161
KIF20B|12498|AT	2.21247	1.032*10^1	10.317	1.305*10^0	1.3052	8.155*10^1	81.5506	2.693*10^-2	0.026934
KIF20B|12497|AT	-2.21247	9.693*10^-2	0.0969278	1.226*10^-2	0.0122623	7.662*10^-1	0.766168	2.693*10^-2	0.026934
FBXW11|74540|ES	-2.21143	1.335*10^-1	0.133472	2.240*10^-2	0.0223993	7.953*10^-1	0.795331	2.701*10^-2	0.0270064
ANKS3|33795|AT	2.21117	2.593*10^2	259.33	1.880*10^0	1.88032	3.577*10^4	35766.1	2.702*10^-2	0.027024
IER2|47929|AP	2.2111	2.443*10^1	24.4255	1.438*10^0	1.43757	4.150*10^2	415.01	2.703*10^-2	0.0270292
ATF2|56069|ES	-2.21086	6.235*10^-10	6.23513e-10	4.309*10^-18	4.30854e-18	9.023*10^-2	0.090232	2.705*10^-2	0.0270454
ANKS3|33799|AT	-2.21076	3.859*10^-3	0.0038592	2.798*10^-5	2.79765e-05	5.324*10^-1	0.532356	2.705*10^-2	0.0270523
CBWD1|85688|AT	2.2106	9.986*10^1	99.8604	1.685*10^0	1.68534	5.917*10^3	5916.95	2.706*10^-2	0.0270636
NEU4|58427|AP	-2.20973	2.829*10^-1	0.282871	9.229*10^-2	0.0922919	8.670*10^-1	0.866989	2.712*10^-2	0.027124
ITIH5|10712|AP	-2.20944	2.437*10^-5	2.43664e-05	1.970*10^-9	1.97007e-09	3.014*10^-1	0.301371	2.714*10^-2	0.0271439
TMEM69|2770|ES	2.20919	1.489*10^2	148.881	1.758*10^0	1.75844	1.261*10^4	12605.1	2.716*10^-2	0.0271612
TRIP12|57852|ES	2.20914	4.880*10^1	48.7998	1.550*10^0	1.5504	1.536*10^3	1536.01	2.716*10^-2	0.0271648
IER2|47930|AP	-2.20831	4.115*10^-2	0.0411501	2.424*10^-3	0.00242419	6.985*10^-1	0.698514	2.722*10^-2	0.027223
SLC38A5|88962|AP	2.20791	1.291*10^1	12.9093	1.333*10^0	1.33276	1.250*10^2	125.042	2.725*10^-2	0.0272509
LINGO1|31993|AP	-2.2069	1.992*10^-1	0.199151	4.751*10^-2	0.0475094	8.348*10^-1	0.834803	2.732*10^-2	0.0273212
SMOX|58624|ES	-2.20676	1.888*10^-1	0.188833	4.297*10^-2	0.0429651	8.299*10^-1	0.829924	2.733*10^-2	0.0273307
KLHL5|69044|ES	2.20665	2.878*10^0	2.87832	1.125*10^0	1.12545	7.361*10^0	7.36123	2.734*10^-2	0.0273388
FUBP1|3546|ES	-2.20648	6.071*10^-2	0.0607124	5.041*10^-3	0.00504073	7.312*10^-1	0.731242	2.735*10^-2	0.0273501
CASC4|30336|ES	2.20623	1.772*10^1	17.7193	1.378*10^0	1.37834	2.278*10^2	227.79	2.737*10^-2	0.0273677
NT5C2|12992|ES	-2.20507	9.183*10^-2	0.0918312	1.100*10^-2	0.0109963	7.669*10^-1	0.766889	2.745*10^-2	0.0274495
MBNL2|26140|ES	2.20486	4.250*10^0	4.24975	1.174*10^0	1.17434	1.538*10^1	15.3792	2.746*10^-2	0.0274639
BCL2L12|51037|AA	2.20464	2.321*10^2	232.121	1.830*10^0	1.83044	2.944*10^4	29435.6	2.748*10^-2	0.0274792
NDRG2|26484|AP	-2.20355	1.012*10^-1	0.1012	1.319*10^-2	0.0131926	7.763*10^-1	0.776299	2.756*10^-2	0.0275558
LCP2|74488|AP	-2.20287	2.631*10^-2	0.0263122	1.034*10^-3	0.001034	6.696*10^-1	0.669566	2.760*10^-2	0.0276039
LCP2|74487|AP	2.20287	3.801*10^1	38.0051	1.494*10^0	1.4935	9.671*10^2	967.115	2.760*10^-2	0.0276039
FAM86C1|17441|ES	2.20283	7.044*10^0	7.04359	1.240*10^0	1.24014	4.001*10^1	40.0053	2.761*10^-2	0.0276067
UBE2D4|79372|ES	2.20274	1.155*10^4	11548.5	2.804*10^0	2.80386	4.757*10^7	4.75656e+07	2.761*10^-2	0.027613
C12orf73|24073|ES	-2.20267	1.333*10^-1	0.133339	2.220*10^-2	0.022199	8.009*10^-1	0.800909	2.762*10^-2	0.0276183
BCAR1|37598|AP	2.2021	6.794*10^0	6.79432	1.235*10^0	1.23452	3.739*10^1	37.3932	2.766*10^-2	0.0276586
TTC13|10258|ME	-2.20189	2.562*10^-1	0.256157	7.621*10^-2	0.0762084	8.610*10^-1	0.861015	2.767*10^-2	0.0276729
TRIM16L|39638|ES	2.20092	1.238*10^1	12.3807	1.317*10^0	1.31715	1.164*10^2	116.374	2.774*10^-2	0.0277416
NPIPA5|34148|RI	-2.20028	1.970*10^-1	0.196953	4.632*10^-2	0.0463228	8.374*10^-1	0.837391	2.779*10^-2	0.0277867
NEU4|58426|AP	2.20006	3.514*10^0	3.51376	1.147*10^0	1.14699	1.076*10^1	10.7643	2.780*10^-2	0.0278029
HIPK1|4318|AD	-2.19966	3.544*10^-4	0.000354427	2.986*10^-7	2.9857e-07	4.207*10^-1	0.420735	2.783*10^-2	0.0278313
SERPINA1|29136|ES	2.19883	1.464*10^1	14.6423	1.339*10^0	1.33852	1.602*10^2	160.174	2.789*10^-2	0.0278897
ATPIF1|1381|RI	-2.1987	1.311*10^-1	0.131095	2.143*10^-2	0.0214282	8.020*10^-1	0.802022	2.790*10^-2	0.0278991
MAPK1|61256|AT	-2.19866	1.646*10^-2	0.0164608	4.232*10^-4	0.000423185	6.403*10^-1	0.640286	2.790*10^-2	0.0279024
MAPK1|61257|AT	2.19858	6.072*10^1	60.7238	1.562*10^0	1.56154	2.361*10^3	2361.37	2.791*10^-2	0.0279076
ARHGEF10L|855|AP	-2.19837	3.153*10^-1	0.315254	1.126*10^-1	0.112639	8.823*10^-1	0.88233	2.792*10^-2	0.0279226
PPIL2|61243|AA	-2.19762	2.509*10^-1	0.250892	7.310*10^-2	0.0730995	8.611*10^-1	0.86111	2.798*10^-2	0.0279761
MRPL49|16789|ES	2.19746	2.595*10^9	2.59466e+09	1.041*10^1	10.4098	6.467*10^17	6.46722e+17	2.799*10^-2	0.0279878
PFDN5|93147|ES	-2.19717	1.537*10^-1	0.15366	2.890*10^-2	0.0289026	8.169*10^-1	0.816925	2.801*10^-2	0.0280085
DNAJC2|81185|AT	2.19657	4.174*10^2	417.425	1.916*10^0	1.9155	9.096*10^4	90965	2.805*10^-2	0.0280509
ROBO3|19251|ES	-2.19656	9.456*10^-5	9.45613e-05	2.426*10^-8	2.42603e-08	3.686*10^-1	0.368579	2.805*10^-2	0.0280517
HERC3|69902|ES	-2.1946	8.821*10^-3	0.00882115	1.290*10^-4	0.000129035	6.030*10^-1	0.603033	2.819*10^-2	0.0281919
ITGB4|43491|AD	2.19411	5.964*10^0	5.96407	1.210*10^0	1.20994	2.940*10^1	29.3984	2.823*10^-2	0.0282274
OGG1|63164|RI	-2.19388	1.449*10^-1	0.144894	2.580*10^-2	0.0257958	8.139*10^-1	0.813862	2.824*10^-2	0.0282443
MRPL55|117454|ES	2.19347	3.373*10^0	3.37262	1.138*10^0	1.13817	9.994*10^0	9.9938	2.827*10^-2	0.0282734
NFIB|85889|ES	-2.19344	1.391*10^-2	0.0139051	3.048*10^-4	0.000304787	6.344*10^-1	0.634386	2.828*10^-2	0.0282756
TVP23B|39655|ES	-2.19279	9.126*10^-5	9.12619e-05	2.236*10^-8	2.23618e-08	3.725*10^-1	0.372453	2.832*10^-2	0.0283225
ZFYVE20|63554|ES	2.19267	4.911*10^0	4.91099	1.184*10^0	1.184	2.037*10^1	20.3698	2.833*10^-2	0.0283315
COX11|42568|AA	2.19229	1.430*10^1	14.2952	1.326*10^0	1.32563	1.542*10^2	154.155	2.836*10^-2	0.0283585
ASAP3|1064|AP	-2.19218	9.198*10^-5	9.19825e-05	2.265*10^-8	2.26452e-08	3.736*10^-1	0.373623	2.837*10^-2	0.0283663
ATP5H|120235|ES	-2.19212	1.498*10^-1	0.149836	2.745*10^-2	0.0274495	8.179*10^-1	0.81789	2.837*10^-2	0.0283711
UBXN11|1257|ES	2.192	3.390*10^0	3.38988	1.138*10^0	1.13795	1.010*10^1	10.0982	2.838*10^-2	0.0283796
RIMKLB|20204|ES	-2.19137	5.940*10^-2	0.0593952	4.753*10^-3	0.00475325	7.422*10^-1	0.742184	2.843*10^-2	0.0284253
CLASP2|63872|AP	2.19054	6.007*10^0	6.00719	1.208*10^0	1.20771	2.988*10^1	29.88	2.849*10^-2	0.0284852
SHC1|91154|ES	2.19002	4.226*10^3	4226.11	2.404*10^0	2.40381	7.430*10^6	7.42986e+06	2.852*10^-2	0.0285226
GON4L|8127|AT	2.18965	4.069*10^3	4068.92	2.391*10^0	2.39123	6.924*10^6	6.92369e+06	2.855*10^-2	0.0285496
RPS6|1412681|ES	-2.18962	8.910*10^-2	0.089097	1.023*10^-2	0.0102299	7.760*10^-1	0.775989	2.855*10^-2	0.0285515
GON4L|8126|AT	-2.18943	2.460*10^-4	0.000245956	1.445*10^-7	1.44534e-07	4.185*10^-1	0.418547	2.857*10^-2	0.0285659
NPFF|22089|RI	-2.18939	7.012*10^-5	7.01236e-05	1.340*10^-8	1.33981e-08	3.670*10^-1	0.367015	2.857*10^-2	0.0285683
UBE2J2|65|ES	2.18931	5.162*10^4	51618.4	3.117*10^0	3.1167	8.549*10^8	8.549e+08	2.857*10^-2	0.0285745
GCHFR|30029|AP	2.18907	2.541*10^0	2.54099	1.103*10^0	1.10252	5.856*10^0	5.85625	2.859*10^-2	0.0285915
SLC24A1|31234|ES	2.18875	5.049*10^0	5.04864	1.184*10^0	1.18441	2.152*10^1	21.5203	2.861*10^-2	0.0286149
MEIS1|53804|AP	-2.18837	2.605*10^-1	0.260478	7.808*10^-2	0.0780761	8.690*10^-1	0.869007	2.864*10^-2	0.0286428
MCCC1|67771|AP	-2.18788	2.166*10^-3	0.00216611	8.890*10^-6	8.8902e-06	5.278*10^-1	0.527778	2.868*10^-2	0.0286783
PTPN22|4286|AT	2.18711	1.540*10^1	15.3952	1.328*10^0	1.32837	1.784*10^2	178.423	2.873*10^-2	0.0287343
FAHD2B|116840|ES	2.18683	6.968*10^0	6.96824	1.223*10^0	1.22311	3.970*10^1	39.699	2.876*10^-2	0.0287552
PRKAR1A|43141|AP	2.18676	5.110*10^0	5.11045	1.184*10^0	1.18434	2.205*10^1	22.0517	2.876*10^-2	0.0287601
PFKFB4|64704|AP	2.18666	1.224*10^1	12.2413	1.297*10^0	1.29652	1.156*10^2	115.578	2.877*10^-2	0.0287672
NSUN5|97503|ES	2.18599	1.679*10^1	16.7864	1.339*10^0	1.33862	2.105*10^2	210.502	2.882*10^-2	0.0288163
ERBB3|22361|ES	-2.1851	6.695*10^-7	6.69488e-07	1.939*10^-12	1.93925e-12	2.311*10^-1	0.231127	2.888*10^-2	0.0288815
TNK2|68210|AA	-2.18425	2.799*10^-2	0.0279854	1.131*10^-3	0.00113068	6.927*10^-1	0.692666	2.894*10^-2	0.0289436
HNRNPA2B1|1026936|ES	2.18359	4.584*10^0	4.58443	1.169*10^0	1.16876	1.798*10^1	17.9824	2.899*10^-2	0.0289923
RPRD1A|45206|ES	2.1834	3.692*10^1	36.9227	1.447*10^0	1.44673	9.423*10^2	942.319	2.901*10^-2	0.0290063
VEGFA|76328|ES	2.18214	5.285*10^0	5.28502	1.185*10^0	1.18473	2.358*10^1	23.5763	2.910*10^-2	0.0290989
GOLGA7|83513|AA	2.18211	1.163*10^3	1162.61	2.052*10^0	2.05152	6.589*10^5	658862	2.910*10^-2	0.0291011
ABTB1|66621|AA	2.18153	8.098*10^0	8.0983	1.237*10^0	1.23669	5.303*10^1	53.0304	2.914*10^-2	0.029144
CCDC138|54896|ES	-2.18107	1.026*10^-1	0.102597	1.326*10^-2	0.013259	7.939*10^-1	0.793881	2.918*10^-2	0.0291786
ERICH1|82554|AT	-2.17985	3.150*10^-2	0.0314953	1.406*10^-3	0.00140598	7.055*10^-1	0.705525	2.927*10^-2	0.0292683
ERICH1|82553|AT	2.17985	3.175*10^1	31.7507	1.417*10^0	1.41738	7.112*10^2	711.246	2.927*10^-2	0.0292683
YIPF3|76294|AA	2.17947	3.603*10^1	36.0322	1.435*10^0	1.43478	9.049*10^2	904.894	2.930*10^-2	0.0292966
APLP2|122404|ES	2.17923	3.954*10^0	3.95429	1.148*10^0	1.14835	1.362*10^1	13.6164	2.931*10^-2	0.0293143
SMARCA4|47611|ES	2.17834	8.027*10^1	80.2657	1.552*10^0	1.55212	4.151*10^3	4150.82	2.938*10^-2	0.0293808
LPAR2|48666|ES	-2.17829	1.494*10^-1	0.149417	2.701*10^-2	0.0270115	8.265*10^-1	0.826514	2.938*10^-2	0.0293841
FAM32A|48143|ES	2.17714	5.089*10^0	5.08864	1.176*10^0	1.17621	2.201*10^1	22.015	2.947*10^-2	0.02947
LDHA|14626|ES	-2.17656	7.218*10^-2	0.072178	6.767*10^-3	0.00676725	7.698*10^-1	0.769834	2.951*10^-2	0.0295135
GCHFR|30031|AP	-2.17646	3.855*10^-1	0.385473	1.634*10^-1	0.163369	9.095*10^-1	0.909533	2.952*10^-2	0.0295211
TOMM34|95960|ES	2.17636	3.635*10^3	3635.2	2.260*10^0	2.25958	5.848*10^6	5.84829e+06	2.953*10^-2	0.0295282
KIAA1324L|80287|ES	-2.17482	5.654*10^-2	0.0565388	4.246*10^-3	0.00424571	7.529*10^-1	0.752908	2.964*10^-2	0.0296437
TMEM198|57722|AP	-2.17444	9.343*10^-2	0.0934328	1.103*10^-2	0.0110292	7.915*10^-1	0.791509	2.967*10^-2	0.0296722
DDX19B|37352|ES	-2.17433	3.216*10^-2	0.0321576	1.451*10^-3	0.00145122	7.126*10^-1	0.712583	2.968*10^-2	0.0296805
MARCH7|55703|ES	2.17359	1.480*10^5	148021	3.222*10^0	3.22227	6.800*10^9	6.79961e+09	2.974*10^-2	0.0297356
RWDD3|91021|ES	-2.17316	2.146*10^-1	0.21464	5.358*10^-2	0.0535774	8.599*10^-1	0.859881	2.977*10^-2	0.0297684
KANSL1|42009|AP	-2.17307	1.565*10^-2	0.0156472	3.681*10^-4	0.000368078	6.652*10^-1	0.665175	2.978*10^-2	0.0297752
TOM1L1|42538|AT	2.17116	6.286*10^0	6.28628	1.196*10^0	1.19581	3.305*10^1	33.0464	2.992*10^-2	0.029919
ZNHIT3|40474|ES	-2.17057	1.490*10^-3	0.00149045	4.177*10^-6	4.17733e-06	5.318*10^-1	0.531784	2.996*10^-2	0.0299638
GABRE|90381|AT	2.16994	6.877*10^0	6.8772	1.205*10^0	1.20513	3.925*10^1	39.2455	3.001*10^-2	0.0300111
MEF2B|48601|ES	2.16961	1.519*10^1	15.1942	1.301*10^0	1.30073	1.775*10^2	177.488	3.004*10^-2	0.0300361
KXD1|48461|RI	-2.16927	6.408*10^-7	6.40758e-07	1.625*10^-12	1.62543e-12	2.526*10^-1	0.252592	3.006*10^-2	0.030062
SPAG16|57329|AT	-2.16858	1.324*10^-4	0.000132436	4.141*10^-8	4.14064e-08	4.236*10^-1	0.42359	3.011*10^-2	0.0301149
ZNF438|11132|RI	2.16829	2.496*10^1	24.9647	1.362*10^0	1.36224	4.575*10^2	457.51	3.014*10^-2	0.0301367
ATRNL1|13221|ES	-2.16765	1.839*10^-4	0.000183922	7.712*10^-8	7.71192e-08	4.386*10^-1	0.438637	3.019*10^-2	0.0301852
SH2D3C|87664|AP	-2.16745	2.633*10^-1	0.263284	7.876*10^-2	0.0787642	8.801*10^-1	0.880074	3.020*10^-2	0.0302008
ABCB8|82294|AA	-2.16449	1.417*10^-1	0.141741	2.416*10^-2	0.0241639	8.314*10^-1	0.831429	3.043*10^-2	0.0304271
PFKFB4|64703|AP	-2.16425	8.359*10^-2	0.0835935	8.833*10^-3	0.00883251	7.912*10^-1	0.791154	3.044*10^-2	0.0304449
MLST8|33212|AP	2.16425	7.416*10^0	7.41634	1.208*10^0	1.2082	4.552*10^1	45.524	3.045*10^-2	0.030445
PPP2R5C|29314|AP	-2.16353	1.203*10^-1	0.120339	1.767*10^-2	0.0176742	8.194*10^-1	0.819359	3.050*10^-2	0.0305001
CNBP|66709|AD	2.16349	1.022*10^2	102.158	1.545*10^0	1.54531	6.753*10^3	6753.48	3.050*10^-2	0.0305038
PPP2R5C|29313|AP	2.16347	8.309*10^0	8.30938	1.220*10^0	1.2204	5.658*10^1	56.5766	3.050*10^-2	0.0305047
RHBDL1|32948|AP	-2.16308	4.427*10^-1	0.442729	2.116*10^-1	0.211594	9.263*10^-1	0.926343	3.054*10^-2	0.030535
CTAGE5|27377|ES	-2.16218	6.454*10^-2	0.0645367	5.382*10^-3	0.00538174	7.739*10^-1	0.77391	3.060*10^-2	0.0306047
BANF1|16983|AD	-2.16212	7.896*10^-5	7.89578e-05	1.508*10^-8	1.50795e-08	4.134*10^-1	0.413432	3.061*10^-2	0.0306086
MLST8|33211|AP	-2.16167	1.351*10^-1	0.135134	2.201*10^-2	0.0220108	8.296*10^-1	0.829641	3.064*10^-2	0.0306434
PDCD6|71422|AT	-2.16166	4.494*10^-5	4.49363e-05	5.139*10^-9	5.1385e-09	3.930*10^-1	0.392969	3.064*10^-2	0.0306443
VEGFA|76319|AP	2.16161	1.323*10^3	1323.35	1.955*10^0	1.95529	8.956*10^5	895648	3.065*10^-2	0.030648
ACOX3|68765|AP	-2.16146	1.998*10^-1	0.199804	4.639*10^-2	0.0463881	8.606*10^-1	0.8606	3.066*10^-2	0.03066
LETMD1|21775|ES	-2.16072	3.251*10^-1	0.32507	1.173*10^-1	0.1173	9.009*10^-1	0.900858	3.072*10^-2	0.0307168
HSCB|61551|ES	2.16	1.254*10^1	12.5389	1.264*10^0	1.26389	1.244*10^2	124.398	3.077*10^-2	0.0307727
MIEF1|62309|AA	2.15966	8.105*10^0	8.10505	1.213*10^0	1.21347	5.414*10^1	54.1353	3.080*10^-2	0.0307987
C5orf63|73181|AT	2.15963	4.528*10^0	4.52836	1.150*10^0	1.14985	1.783*10^1	17.8336	3.080*10^-2	0.0308017
TTYH1|51889|AA	-2.1596	3.097*10^-4	0.000309687	2.024*10^-7	2.02408e-07	4.738*10^-1	0.473825	3.080*10^-2	0.0308037
ANKRD54|62163|AP	2.15949	4.663*10^0	4.66329	1.153*10^0	1.15288	1.886*10^1	18.8626	3.081*10^-2	0.0308119
HERPUD2|97423|ES	-2.15915	5.096*10^-4	0.000509643	5.228*10^-7	5.22751e-07	4.969*10^-1	0.496864	3.084*10^-2	0.0308385
DONSON|60445|ES	2.15867	3.705*10^1	37.0534	1.394*10^0	1.39447	9.846*10^2	984.571	3.088*10^-2	0.0308759
MFF|57808|ES	-2.15788	6.814*10^-2	0.0681412	5.940*10^-3	0.00594039	7.816*10^-1	0.781635	3.094*10^-2	0.0309373
C5orf45|74972|ES	2.15777	3.852*10^0	3.85221	1.132*10^0	1.1316	1.311*10^1	13.1138	3.095*10^-2	0.0309461
ESRRA|16632|AA	-2.15763	7.175*10^-4	0.000717505	9.993*10^-7	9.99306e-07	5.152*10^-1	0.515172	3.096*10^-2	0.0309565
YAF2|21105|AT	2.15708	1.962*10^19	1.96226e+19	5.794*10^1	57.9371	6.646*10^36	6.64593e+36	3.100*10^-2	0.0309998
MTERFD2|58317|ES	2.15692	5.155*10^0	5.15511	1.162*10^0	1.16155	2.288*10^1	22.8791	3.101*10^-2	0.0310116
RANBP1|61138|RI	-2.15633	1.765*10^-2	0.0176454	4.497*10^-4	0.00044971	6.924*10^-1	0.69236	3.106*10^-2	0.0310582
TPD52|84276|ES	2.15529	5.947*10^0	5.94682	1.175*10^0	1.17536	3.009*10^1	30.0884	3.114*10^-2	0.0311392
FAM71D|28039|AT	2.15479	3.887*10^0	3.88727	1.131*10^0	1.13061	1.337*10^1	13.3652	3.118*10^-2	0.0311782
ZNF607|49565|AP	-2.15446	1.164*10^-1	0.116397	1.645*10^-2	0.0164515	8.235*10^-1	0.823526	3.120*10^-2	0.0312042
POU6F1|21805|AP	2.15377	6.258*10^0	6.25753	1.179*10^0	1.1794	3.320*10^1	33.2004	3.126*10^-2	0.0312586
C14orf159|28869|ES	2.15312	5.507*10^0	5.50709	1.165*10^0	1.16538	2.602*10^1	26.0241	3.131*10^-2	0.0313092
NAPEPLD|81166|AP	2.15293	7.349*10^0	7.34919	1.196*10^0	1.19575	4.517*10^1	45.1689	3.132*10^-2	0.0313245
TCF4|45609|AP	-2.15202	5.863*10^-2	0.0586278	4.427*10^-3	0.00442737	7.764*10^-1	0.776358	3.140*10^-2	0.031396
FBXO28|9935|ES	-2.15176	6.299*10^-6	6.29926e-06	1.154*10^-10	1.15384e-10	3.439*10^-1	0.343899	3.142*10^-2	0.031416
RBPJ|68982|ES	-2.15127	2.447*10^-8	2.44683e-08	2.845*10^-15	2.84499e-15	2.104*10^-1	0.21044	3.145*10^-2	0.0314546
C2CD5|20730|AP	-2.1511	1.363*10^-1	0.136289	2.217*10^-2	0.022173	8.377*10^-1	0.837711	3.147*10^-2	0.0314687
ZNF205|33452|AA	-2.15053	1.871*10^-1	0.187145	4.063*10^-2	0.0406303	8.620*10^-1	0.861997	3.151*10^-2	0.0315135
FCAR|51954|AT	-2.15027	1.647*10^-1	0.164713	3.183*10^-2	0.0318256	8.525*10^-1	0.852469	3.153*10^-2	0.031534
CEP63|66877|AT	-2.14978	1.599*10^-1	0.159873	3.005*10^-2	0.0300507	8.505*10^-1	0.850541	3.157*10^-2	0.0315723
CEP63|66878|AT	2.14978	6.255*10^0	6.25497	1.176*10^0	1.17572	3.328*10^1	33.2771	3.157*10^-2	0.0315723
PPP2R3C|27203|ES	-2.14856	1.870*10^-10	1.87028e-10	2.499*10^-19	2.49881e-19	1.400*10^-1	0.139985	3.167*10^-2	0.0316691
FAM104B|89279|AD	2.14785	6.806*10^0	6.80631	1.183*10^0	1.18266	3.917*10^1	39.171	3.173*10^-2	0.0317259
MYD88|64031|ES	-2.14773	5.593*10^-9	5.59333e-09	1.647*10^-16	1.64746e-16	1.899*10^-1	0.189901	3.173*10^-2	0.031735
GRIA3|90013|AT	-2.14773	1.079*10^-1	0.107888	1.414*10^-2	0.0141412	8.231*10^-1	0.82311	3.174*10^-2	0.0317353
TMEM198|57723|AP	2.14739	1.037*10^1	10.3684	1.226*10^0	1.22646	8.765*10^1	87.6536	3.176*10^-2	0.0317621
TAF6|80895|AP	2.14727	7.928*10^0	7.92837	1.198*10^0	1.19795	5.247*10^1	52.4724	3.177*10^-2	0.0317714
CTDSPL|64002|ES	-2.14716	1.681*10^-1	0.168082	3.300*10^-2	0.0330037	8.560*10^-1	0.856007	3.178*10^-2	0.0317803
MAPKBP1|30106|ES	2.14673	6.839*10^1	68.3895	1.444*10^0	1.44426	3.238*10^3	3238.42	3.181*10^-2	0.0318148
MUM1|46458|ES	2.14566	2.196*10^1	21.9622	1.307*10^0	1.30651	3.692*10^2	369.181	3.190*10^-2	0.0319003
TMEM251|29025|AD	2.14513	1.186*10^1	11.8633	1.238*10^0	1.23801	1.137*10^2	113.68	3.194*10^-2	0.0319426
HSD17B7|8753|AT	2.14489	8.820*10^1	88.2031	1.471*10^0	1.47142	5.287*10^3	5287.26	3.196*10^-2	0.0319614
ARMC10|81160|ES	-2.14444	7.950*10^-3	0.00794997	9.580*10^-5	9.57974e-05	6.597*10^-1	0.659747	3.200*10^-2	0.0319975
PPIL2|61246|AA	-2.14391	4.284*10^-1	0.428448	1.974*10^-1	0.197415	9.299*10^-1	0.929858	3.204*10^-2	0.0320399
NSUN5|79935|RI	-2.14379	2.026*10^-1	0.202604	4.707*10^-2	0.0470705	8.721*10^-1	0.872059	3.205*10^-2	0.0320496
INTS7|9724|ES	-2.14275	8.559*10^-7	8.55894e-07	2.412*10^-12	2.41224e-12	3.037*10^-1	0.303682	3.213*10^-2	0.0321335
HERC4|11914|AT	2.1424	2.097*10^2	209.735	1.577*10^0	1.57653	2.790*10^4	27902.2	3.216*10^-2	0.0321612
HERC4|11913|AT	-2.1424	4.768*10^-3	0.00476793	3.584*10^-5	3.58395e-05	6.343*10^-1	0.634304	3.216*10^-2	0.0321612
TRIQK|84507|ES	-2.142	6.727*10^-2	0.0672688	5.692*10^-3	0.00569175	7.950*10^-1	0.795025	3.219*10^-2	0.0321932
PPM1N|50473|AP	-2.14195	4.937*10^-2	0.0493707	3.147*10^-3	0.00314736	7.744*10^-1	0.774449	3.220*10^-2	0.0321974
METTL21A|57193|ES	2.14172	1.061*10^1	10.6111	1.222*10^0	1.22195	9.214*10^1	92.1441	3.222*10^-2	0.0322157
TRABD|62789|AP	2.14119	8.622*10^0	8.62209	1.200*10^0	1.20001	6.195*10^1	61.9496	3.226*10^-2	0.0322591
UBXN11|1252|ES	2.14029	2.925*10^1	29.2472	1.329*10^0	1.32898	6.436*10^2	643.647	3.233*10^-2	0.0323317
CEP135|69338|AT	-2.13968	2.439*10^-2	0.0243917	8.127*10^-4	0.000812726	7.320*10^-1	0.732046	3.238*10^-2	0.0323803
CEP135|69337|AT	2.13968	4.100*10^1	40.9976	1.366*10^0	1.36603	1.230*10^3	1230.43	3.238*10^-2	0.0323803
ULK2|39775|AT	2.13905	6.064*10^0	6.06425	1.163*10^0	1.16288	3.162*10^1	31.6241	3.243*10^-2	0.0324314
ULK2|39776|AT	-2.13899	1.649*10^-1	0.164912	3.162*10^-2	0.0316241	8.600*10^-1	0.859976	3.244*10^-2	0.0324364
RNF146|77446|AT	2.13867	7.939*10^3	7938.92	2.118*10^0	2.11773	2.976*10^7	2.97614e+07	3.246*10^-2	0.032462
ZNF385A|22176|AP	-2.13804	8.039*10^-2	0.0803881	7.972*10^-3	0.00797206	8.106*10^-1	0.810612	3.251*10^-2	0.0325133
TMUB2|41792|RI	-2.13797	1.043*10^-3	0.00104289	1.926*10^-6	1.92635e-06	5.646*10^-1	0.564604	3.252*10^-2	0.0325194
U2AF1L4|49276|ES	2.13682	3.299*10^0	3.29944	1.104*10^0	1.10385	9.862*10^0	9.86214	3.261*10^-2	0.0326122
TMEM62|30214|ES	2.13625	1.289*10^1	12.891	1.235*10^0	1.23487	1.346*10^2	134.571	3.266*10^-2	0.0326589
IRF9|26880|ES	2.13619	8.896*10^0	8.89604	1.198*10^0	1.19758	6.608*10^1	66.0827	3.266*10^-2	0.0326638
PRKAR1A|43143|AP	-2.13545	2.180*10^-1	0.218005	5.386*10^-2	0.0538637	8.823*10^-1	0.882339	3.272*10^-2	0.0327239
CERS1|48510|AT	-2.13539	1.573*10^-1	0.157335	2.882*10^-2	0.028816	8.590*10^-1	0.859046	3.273*10^-2	0.0327289
CERS1|48511|AT	2.13539	6.356*10^0	6.35587	1.164*10^0	1.16408	3.470*10^1	34.7029	3.273*10^-2	0.0327289
BET1L|13577|RI	-2.13523	2.866*10^-2	0.0286638	1.100*10^-3	0.00109976	7.471*10^-1	0.747088	3.274*10^-2	0.032742
PNKD|57460|AP	-2.13521	9.824*10^-3	0.00982412	1.410*10^-4	0.000141049	6.843*10^-1	0.684255	3.274*10^-2	0.0327438
ACSS2|59044|ES	2.1345	1.198*10^6	1.19793e+06	3.141*10^0	3.1408	4.569*10^11	4.56904e+11	3.280*10^-2	0.0328015
TP53I3|52810|ES	2.13429	1.092*10^3	1091.85	1.771*10^0	1.77073	6.732*10^5	673242	3.282*10^-2	0.0328191
TMCO4|915|RI	-2.1342	1.836*10^-4	0.00018356	6.801*10^-8	6.80114e-08	4.954*10^-1	0.49542	3.283*10^-2	0.0328264
VRK3|51144|AT	2.13415	6.684*10^1	66.8402	1.409*10^0	1.40914	3.170*10^3	3170.46	3.283*10^-2	0.0328308
EIF2A|67283|ES	-2.1339	1.363*10^-6	1.36323e-06	5.588*10^-12	5.58775e-12	3.326*10^-1	0.332586	3.285*10^-2	0.032851
PDZD4|90507|AD	-2.13357	1.760*10^-1	0.175984	3.567*10^-2	0.035673	8.682*10^-1	0.868173	3.288*10^-2	0.0328783
PIN4|89441|AT	-2.13312	8.379*10^-3	0.00837914	1.035*10^-4	0.00010351	6.783*10^-1	0.67829	3.291*10^-2	0.0329148
PIN4|89442|AT	2.13281	1.192*10^2	119.238	1.473*10^0	1.47326	9.651*10^3	9650.56	3.294*10^-2	0.0329399
SLC25A35|39153|RI	-2.13277	4.780*10^-4	0.000477993	4.245*10^-7	4.24518e-07	5.382*10^-1	0.538204	3.294*10^-2	0.0329433
ZC3H14|28717|ES	-2.13261	1.103*10^-1	0.110261	1.453*10^-2	0.0145334	8.365*10^-1	0.836525	3.296*10^-2	0.0329567
FKBP11|21495|AT	2.13165	6.438*10^0	6.43788	1.162*10^0	1.16181	3.567*10^1	35.6738	3.304*10^-2	0.0330359
NRBF2|11887|ES	-2.1313	6.191*10^-6	6.19097e-06	1.005*10^-10	1.00511e-10	3.813*10^-1	0.381333	3.306*10^-2	0.0330643
PNKD|57461|AP	2.13061	1.008*10^2	100.795	1.447*10^0	1.44697	7.021*10^3	7021.27	3.312*10^-2	0.0331214
TMEM185A|90320|AA	2.12987	7.454*10^2	745.401	1.695*10^0	1.69486	3.278*10^5	327828	3.318*10^-2	0.0331827
CMTM3|36804|AP	2.129	5.829*10^0	5.82852	1.150*10^0	1.15023	2.953*10^1	29.5348	3.325*10^-2	0.0332541
ICAM1|47490|ES	-2.12867	1.458*10^-4	0.000145848	4.284*10^-8	4.28374e-08	4.966*10^-1	0.496569	3.328*10^-2	0.0332819
CPT1C|51063|ES	2.12813	4.109*10^0	4.10905	1.118*10^0	1.11815	1.510*10^1	15.1002	3.333*10^-2	0.0333262
NUSAP1|30082|AA	2.1274	1.206*10^1	12.0569	1.216*10^0	1.21646	1.195*10^2	119.503	3.339*10^-2	0.0333871
PLA2G7|76421|AT	2.127	8.563*10^1	85.6306	1.418*10^0	1.41832	5.170*10^3	5169.91	3.342*10^-2	0.0334197
C5orf45|74979|ES	2.12699	3.476*10^0	3.47574	1.103*10^0	1.10278	1.095*10^1	10.9549	3.342*10^-2	0.0334208
GLUD1|12446|ES	-2.1259	2.492*10^-1	0.249225	6.923*10^-2	0.069228	8.972*10^-1	0.897223	3.351*10^-2	0.0335114
BOC|66194|AT	-2.12576	4.005*10^-3	0.00400542	2.468*10^-5	2.46761e-05	6.502*10^-1	0.650157	3.352*10^-2	0.033523
BOC|66193|AT	2.12557	2.494*10^2	249.381	1.537*10^0	1.53724	4.046*10^4	40456.4	3.354*10^-2	0.0335393
ZNF773|52279|AT	2.12544	1.781*10^1	17.812	1.251*10^0	1.25134	2.535*10^2	253.542	3.355*10^-2	0.0335498
ZNF773|52278|AT	-2.12542	5.614*10^-2	0.0561434	3.944*10^-3	0.00394419	7.992*10^-1	0.799171	3.355*10^-2	0.0335519
MCM8|58661|AA	-2.12539	3.052*10^-6	3.05211e-06	2.503*10^-11	2.50315e-11	3.721*10^-1	0.372147	3.355*10^-2	0.0335539
TTLL3|63226|RI	-2.1252	3.211*10^-1	0.321059	1.126*10^-1	0.112599	9.155*10^-1	0.915453	3.357*10^-2	0.0335698
TMEM64|84416|AP	-2.1252	3.450*10^-7	3.45033e-07	3.786*10^-13	3.78579e-13	3.145*10^-1	0.31446	3.357*10^-2	0.03357
CRTC1|106128|ES	2.12494	7.187*10^0	7.1865	1.165*10^0	1.16546	4.431*10^1	44.3138	3.359*10^-2	0.033592
STXBP5|78052|AT	-2.1246	1.645*10^-8	1.645e-08	1.085*10^-15	1.08516e-15	2.494*10^-1	0.249368	3.362*10^-2	0.0336203
ATG4D|47533|ES	2.12395	4.819*10^3	4818.53	1.925*10^0	1.92465	1.206*10^7	1.20636e+07	3.367*10^-2	0.0336742
RHCE|1185|ES	2.12347	1.038*10^2	103.772	1.430*10^0	1.42968	7.532*10^3	7532.21	3.371*10^-2	0.0337144
PNMA3|90416|RI	-2.12277	2.118*10^-1	0.211811	5.053*10^-2	0.0505348	8.878*10^-1	0.887778	3.377*10^-2	0.0337734
GPRC5B|34342|AP	-2.12145	2.089*10^-8	2.08931e-08	1.677*10^-15	1.67732e-15	2.602*10^-1	0.260248	3.388*10^-2	0.0338838
GAS7|39265|ES	-2.12143	8.641*10^-10	8.6407e-10	3.655*10^-18	3.65533e-18	2.043*10^-1	0.204255	3.389*10^-2	0.0338858
C12orf23|24176|AP	2.12129	7.692*10^0	7.69172	1.168*10^0	1.16784	5.066*10^1	50.6596	3.390*10^-2	0.0338971
MAD2L2|665|ES	2.12108	2.651*10^0	2.65091	1.077*10^0	1.07687	6.526*10^0	6.52574	3.391*10^-2	0.0339147
GPER1|78565|AP	2.12001	3.308*10^0	3.30806	1.095*10^0	1.09452	9.998*10^0	9.9982	3.401*10^-2	0.034005
TUBA4A|57674|AP	-2.11978	4.813*10^-2	0.048132	2.912*10^-3	0.00291207	7.955*10^-1	0.795548	3.402*10^-2	0.0340248
TAX1BP1|79064|ES	-2.11922	8.493*10^-8	8.49278e-08	2.452*10^-14	2.45163e-14	2.942*10^-1	0.294201	3.407*10^-2	0.0340723
TMEM256-PLSCR3|38938|ES	-2.11838	4.197*10^-2	0.0419741	2.233*10^-3	0.00223325	7.889*10^-1	0.788907	3.414*10^-2	0.0341432
ZCCHC10|73332|ES	-2.11811	1.943*10^-1	0.194254	4.265*10^-2	0.0426453	8.848*10^-1	0.884846	3.417*10^-2	0.0341659
CCDC88A|53613|RI	-2.11681	6.809*10^-5	6.80912e-05	9.439*10^-9	9.43903e-09	4.912*10^-1	0.491196	3.428*10^-2	0.0342761
SGOL1|63705|AD	-2.11604	2.264*10^-1	0.226437	5.721*10^-2	0.0572101	8.962*10^-1	0.896238	3.434*10^-2	0.0343418
MIER1|3342|ES	-2.11584	2.712*10^-1	0.271185	8.096*10^-2	0.0809623	9.083*10^-1	0.908338	3.436*10^-2	0.0343582
PDHX|14973|ES	-2.11476	9.585*10^-6	9.58524e-06	2.141*10^-10	2.14065e-10	4.292*10^-1	0.429201	3.445*10^-2	0.0344503
ZSCAN18|52399|AP	2.11474	1.481*10^6	1.48115e+06	2.829*10^0	2.82884	7.755*10^11	7.75513e+11	3.445*10^-2	0.0344525
ANKRD54|62165|ES	2.11466	1.130*10^6	1.12981e+06	2.772*10^0	2.77207	4.605*10^11	4.60473e+11	3.446*10^-2	0.0344589
NEURL1B|74551|ES	-2.11455	1.906*10^-1	0.19063	4.102*10^-2	0.041021	8.859*10^-1	0.885887	3.447*10^-2	0.0344684
CEP19|68254|ES	2.11424	3.670*10^4	36700.8	2.153*10^0	2.15319	6.256*10^8	6.25559e+08	3.449*10^-2	0.0344949
PDE4DIP|4411|AT	-2.11421	1.004*10^-1	0.10038	1.192*10^-2	0.0119161	8.456*10^-1	0.845598	3.450*10^-2	0.0344975
TCF12|30784|AP	2.11241	3.342*10^0	3.34214	1.091*10^0	1.09098	1.024*10^1	10.2384	3.465*10^-2	0.0346509
TRIOBP|62150|AP	-2.11206	2.458*10^-2	0.0245823	7.891*10^-4	0.000789115	7.658*10^-1	0.765781	3.468*10^-2	0.0346814
GART|60430|AT	2.11202	1.697*10^1	16.9715	1.226*10^0	1.22612	2.349*10^2	234.913	3.468*10^-2	0.0346847
GART|60431|AT	-2.11202	5.892*10^-2	0.0589223	4.257*10^-3	0.0042569	8.156*10^-1	0.815578	3.468*10^-2	0.0346847
TOM1L2|39510|ES	-2.1119	1.203*10^-1	0.120255	1.684*10^-2	0.0168416	8.587*10^-1	0.858657	3.469*10^-2	0.034695
STRADB|56841|ES	-2.11184	1.463*10^-7	1.46281e-07	6.636*10^-14	6.63606e-14	3.225*10^-1	0.322454	3.470*10^-2	0.0347003
R3HDM1|55441|AP	-2.11171	1.001*10^-1	0.10005	1.181*10^-2	0.0118108	8.475*10^-1	0.847536	3.471*10^-2	0.0347117
PAIP1|71962|AD	2.11163	1.107*10^1	11.0735	1.189*10^0	1.18852	1.032*10^2	103.173	3.472*10^-2	0.0347179
TNK2|68201|AP	-2.11124	3.146*10^-1	0.314579	1.075*10^-1	0.10751	9.205*10^-1	0.920472	3.475*10^-2	0.0347515
TCAIM|64362|AA	2.11091	6.136*10^0	6.13594	1.139*10^0	1.13852	3.307*10^1	33.0691	3.478*10^-2	0.03478
PLGRKT|85789|ES	2.10997	1.941*10^3	1941.07	1.713*10^0	1.71299	2.200*10^6	2.19953e+06	3.486*10^-2	0.0348613
PTCH1|86957|AT	2.10995	2.082*10^6	2.08154e+06	2.813*10^0	2.81278	1.540*10^12	1.54041e+12	3.486*10^-2	0.0348629
MPPED2|14795|ES	2.10977	1.410*10^1	14.0988	1.207*10^0	1.2067	1.647*10^2	164.727	3.488*10^-2	0.0348782
MAGED1|89145|AP	-2.10956	4.615*10^-3	0.00461521	3.119*10^-5	3.11909e-05	6.829*10^-1	0.682897	3.490*10^-2	0.0348959
MAGED1|89146|AP	2.10956	2.167*10^2	216.675	1.464*10^0	1.46435	3.206*10^4	32060.6	3.490*10^-2	0.0348959
R3HDM1|55440|AP	2.10916	9.939*10^0	9.93885	1.176*10^0	1.17638	8.397*10^1	83.97	3.493*10^-2	0.0349308
FAM182B|58880|AP	2.10914	4.405*10^0	4.40539	1.111*10^0	1.11057	1.748*10^1	17.4752	3.493*10^-2	0.0349328
MRPL9|7650|ES	2.10869	1.309*10^3	1309.11	1.659*10^0	1.65897	1.033*10^6	1.03303e+06	3.497*10^-2	0.0349714
FAM211B|61458|ES	2.10864	4.371*10^0	4.37139	1.110*10^0	1.1096	1.722*10^1	17.2215	3.498*10^-2	0.034976
ACYP1|28474|AP	-2.10844	8.755*10^-2	0.0875543	9.100*10^-3	0.00909994	8.424*10^-1	0.842396	3.499*10^-2	0.0349931
PLSCR4|67149|ES	2.10812	1.377*10^1	13.7741	1.202*10^0	1.20241	1.578*10^2	157.788	3.502*10^-2	0.0350208
MFF|57797|ES	-2.10796	4.096*10^-5	4.09602e-05	3.410*10^-9	3.41014e-09	4.920*10^-1	0.491984	3.503*10^-2	0.0350344
IFI44|91013|ES	2.10791	1.242*10^1	12.4194	1.193*10^0	1.19342	1.292*10^2	129.244	3.504*10^-2	0.0350385
SERPINE3|25931|AT	2.1079	4.411*10^0	4.41112	1.110*10^0	1.10977	1.753*10^1	17.5333	3.504*10^-2	0.03504
SORBS3|83015|AP	-2.10747	3.383*10^-1	0.338334	1.235*10^-1	0.123491	9.270*10^-1	0.926952	3.508*10^-2	0.0350766
TUBA4A|57673|AP	2.10708	1.955*10^1	19.5499	1.231*10^0	1.23069	3.106*10^2	310.559	3.511*10^-2	0.0351107
NCKIPSD|64731|AT	2.10667	2.258*10^3	2258.04	1.712*10^0	1.71218	2.978*10^6	2.97794e+06	3.515*10^-2	0.0351463
ZNF138|115224|ES	2.10579	3.874*10^0	3.874	1.098*10^0	1.09832	1.366*10^1	13.6643	3.522*10^-2	0.0352224
CCDC136|81722|ES	2.10545	7.779*10^0	7.77944	1.152*10^0	1.15229	5.252*10^1	52.5211	3.525*10^-2	0.0352523
LRCH3|68318|AT	-2.10527	8.133*10^-4	0.000813274	1.081*10^-6	1.08074e-06	6.120*10^-1	0.611999	3.527*10^-2	0.0352682
GALK2|30535|ES	-2.10519	1.973*10^-1	0.197273	4.353*10^-2	0.0435275	8.941*10^-1	0.894071	3.528*10^-2	0.0352752
IFNAR2|60390|AA	2.10487	6.805*10^0	6.80549	1.141*10^0	1.14113	4.059*10^1	40.5866	3.530*10^-2	0.035303
MAPKAP1|87583|ES	2.10476	3.639*10^1	36.3862	1.281*10^0	1.28051	1.034*10^3	1033.93	3.531*10^-2	0.0353124
SERPINE3|25932|AT	-2.10454	2.272*10^-1	0.227171	5.714*10^-2	0.0571379	9.032*10^-1	0.903198	3.533*10^-2	0.0353313
FLAD1|7872|AD	-2.10454	1.587*10^-1	0.158669	2.857*10^-2	0.0285696	8.812*10^-1	0.881205	3.533*10^-2	0.0353316
UNC119|39915|RI	-2.10431	2.375*10^-2	0.0237522	7.292*10^-4	0.000729164	7.737*10^-1	0.77372	3.535*10^-2	0.0353518
CUX1|81075|AA	-2.1037	1.987*10^-1	0.198715	4.410*10^-2	0.0440973	8.955*10^-1	0.89547	3.540*10^-2	0.0354045
STX1B|36214|RI	-2.10332	3.560*10^-1	0.356024	1.360*10^-1	0.135997	9.320*10^-1	0.932032	3.544*10^-2	0.0354382
NCAPG|68862|ES	-2.1033	5.242*10^-3	0.00524218	3.930*10^-5	3.93037e-05	6.992*10^-1	0.699184	3.544*10^-2	0.0354398
MED15|61162|AP	2.10287	7.826*10^1	78.256	1.345*10^0	1.34486	4.554*10^3	4553.64	3.548*10^-2	0.0354774
ZCCHC8|24963|ES	-2.10263	2.223*10^-1	0.222331	5.474*10^-2	0.0547401	9.030*10^-1	0.903013	3.550*10^-2	0.0354984
COPZ1|22159|RI	-2.10238	1.180*10^-1	0.118019	1.610*10^-2	0.0160981	8.652*10^-1	0.865232	3.552*10^-2	0.0355198
EIF3M|14852|ES	2.10208	1.485*10^1	14.8466	1.200*10^0	1.20008	1.837*10^2	183.672	3.555*10^-2	0.0355463
UBE2D4|79375|ES	2.10159	4.422*10^0	4.42166	1.105*10^0	1.10536	1.769*10^1	17.6875	3.559*10^-2	0.0355893
RNF167|38614|AD	-2.10147	5.146*10^-2	0.0514644	3.234*10^-3	0.00323429	8.189*10^-1	0.818909	3.560*10^-2	0.0355995
WRB|60626|AP	-2.10143	4.752*10^-2	0.0475248	2.773*10^-3	0.00277273	8.146*10^-1	0.814578	3.560*10^-2	0.0356034
WRB|60627|AP	2.10143	2.104*10^1	21.0417	1.228*10^0	1.22763	3.607*10^2	360.656	3.560*10^-2	0.0356034
FERMT1|58666|ES	2.10092	1.219*10^12	1.21947e+12	6.470*10^0	6.46965	2.299*10^23	2.2986e+23	3.565*10^-2	0.0356482
SORBS3|83014|AP	2.10084	2.942*10^0	2.94207	1.075*10^0	1.07505	8.052*10^0	8.05155	3.565*10^-2	0.0356548
TCEB2|33302|RI	-2.10074	1.586*10^-2	0.0158614	3.321*10^-4	0.00033211	7.575*10^-1	0.757532	3.566*10^-2	0.0356639
GTPBP8|66128|ES	2.10032	8.521*10^1	85.2073	1.346*10^0	1.34587	5.395*10^3	5394.5	3.570*10^-2	0.0357011
ATG4D|47535|ES	2.1002	1.281*10^1	12.8052	1.186*10^0	1.18561	1.383*10^2	138.302	3.571*10^-2	0.0357114
APBB3|73680|AD	-2.10012	3.462*10^-1	0.346239	1.287*10^-1	0.128674	9.317*10^-1	0.931665	3.572*10^-2	0.0357185
TAZ|90588|ES	2.0999	2.956*10^4	29561.2	1.986*10^0	1.9858	4.401*10^8	4.40055e+08	3.574*10^-2	0.0357372
OPTN|10777|AP	2.09941	5.030*10^3	5029.6	1.761*10^0	1.76143	1.436*10^7	1.43616e+07	3.578*10^-2	0.0357806
TANGO2|61114|AP	-2.09921	1.582*10^-1	0.15819	2.828*10^-2	0.02828	8.849*10^-1	0.884867	3.580*10^-2	0.035798
CD86|66423|ES	-2.09915	3.554*10^-3	0.00355366	1.835*10^-5	1.83549e-05	6.880*10^-1	0.688017	3.580*10^-2	0.035804
ACYP1|28473|AP	2.0983	1.128*10^1	11.2822	1.173*10^0	1.17323	1.085*10^2	108.494	3.588*10^-2	0.0358787
MED16|46333|RI	-2.09823	4.139*10^-8	4.13886e-08	5.251*10^-15	5.25131e-15	3.262*10^-1	0.326208	3.589*10^-2	0.0358853
FARP1|26163|AP	-2.09806	2.328*10^-1	0.232816	5.966*10^-2	0.0596609	9.085*10^-1	0.908526	3.590*10^-2	0.0359002
TMEM179B|16427|ES	2.09774	2.162*10^5	216229	2.241*10^0	2.24072	2.087*10^10	2.0866e+10	3.593*10^-2	0.0359281
LBX2|54099|AP	-2.09748	7.026*10^-2	0.0702619	5.876*10^-3	0.00587558	8.402*10^-1	0.840213	3.595*10^-2	0.0359513
ADAMTSL4|7486|AT	-2.0967	2.271*10^-2	0.0227073	6.600*10^-4	0.00065998	7.813*10^-1	0.781266	3.602*10^-2	0.0360203
ADAMTSL4|7487|AT	2.0967	4.404*10^1	44.0388	1.280*10^0	1.27997	1.515*10^3	1515.2	3.602*10^-2	0.0360203
RBMS1|55726|AP	-2.09603	2.279*10^-1	0.227886	5.716*10^-2	0.0571647	9.085*10^-1	0.908461	3.608*10^-2	0.0360797
ACLY|40960|ES	2.09585	1.084*10^1	10.8398	1.167*10^0	1.1671	1.007*10^2	100.679	3.610*10^-2	0.0360952
BARD1|57344|ES	-2.09576	9.006*10^-2	0.0900594	9.480*10^-3	0.00947978	8.556*10^-1	0.855578	3.610*10^-2	0.0361038
CLCC1|3975|ES	2.09572	1.392*10^7	1.39227e+07	2.902*10^0	2.90239	6.679*10^13	6.67869e+13	3.611*10^-2	0.036107
BAI2|1505|ES	2.09489	5.653*10^0	5.65328	1.118*10^0	1.11803	2.859*10^1	28.5856	3.618*10^-2	0.0361804
RGS12|68639|AT	2.09397	7.172*10^0	7.1715	1.134*10^0	1.13437	4.534*10^1	45.3381	3.626*10^-2	0.0362625
RGS12|68642|AT	-2.09397	1.394*10^-1	0.139441	2.206*10^-2	0.0220565	8.815*10^-1	0.881543	3.626*10^-2	0.0362625
MAEA|68472|AA	2.09336	2.395*10^9	2.39525e+09	3.960*10^0	3.95994	1.449*10^18	1.44881e+18	3.632*10^-2	0.0363169
TOE1|2678|ES	-2.09268	9.467*10^-7	9.46706e-07	2.160*10^-12	2.16004e-12	4.149*10^-1	0.414924	3.638*10^-2	0.0363775
FUBP1|3542|AT	-2.09249	5.919*10^-2	0.0591878	4.190*10^-3	0.00419008	8.361*10^-1	0.836069	3.639*10^-2	0.036395
FUBP1|3543|AT	2.09248	1.690*10^1	16.8953	1.196*10^0	1.19607	2.387*10^2	238.658	3.640*10^-2	0.0363953
ZBTB49|68658|ES	-2.09159	9.371*10^-2	0.0937066	1.019*10^-2	0.0101917	8.616*10^-1	0.861574	3.648*10^-2	0.0364753
SYT17|34293|AT	-2.09098	1.035*10^-1	0.103537	1.236*10^-2	0.0123567	8.675*10^-1	0.867536	3.653*10^-2	0.0365298
SYT17|34294|AT	2.09098	9.658*10^0	9.65841	1.153*10^0	1.15269	8.093*10^1	80.928	3.653*10^-2	0.0365298
UBR4|881|ES	2.09084	3.264*10^9	3.26416e+09	3.940*10^0	3.94022	2.704*10^18	2.7041e+18	3.654*10^-2	0.0365423
SGSM2|38394|ES	2.09068	1.389*10^1	13.8938	1.179*10^0	1.17884	1.638*10^2	163.754	3.656*10^-2	0.0365567
ACIN1|26707|RI	-2.09056	2.511*10^-1	0.251149	6.876*10^-2	0.0687622	9.173*10^-1	0.917307	3.657*10^-2	0.0365678
ARSA|62901|AD	2.08996	1.897*10^1	18.9652	1.201*10^0	1.20085	2.995*10^2	299.521	3.662*10^-2	0.0366214
PAICS|69357|AP	2.08937	4.714*10^1	47.1446	1.270*10^0	1.26954	1.751*10^3	1750.72	3.667*10^-2	0.0366741
RASA4B|81102|ES	2.08932	7.120*10^0	7.11988	1.129*10^0	1.12922	4.489*10^1	44.8917	3.668*10^-2	0.0366789
EIF3M|14856|ES	2.08925	6.638*10^0	6.63762	1.124*10^0	1.12426	3.919*10^1	39.1885	3.669*10^-2	0.0366855
PRKAG2|82385|AP	2.0892	3.100*10^0	3.10009	1.072*10^0	1.0725	8.961*10^0	8.96088	3.669*10^-2	0.0366895
PTPRN2|82517|ES	-2.08919	8.275*10^-2	0.0827532	7.989*10^-3	0.00798931	8.572*10^-1	0.857157	3.669*10^-2	0.0366907
IGHMBP2|17351|ES	2.08909	5.043*10^3	5042.74	1.694*10^0	1.69377	1.501*10^7	1.50134e+07	3.670*10^-2	0.0367
SH3TC1|68758|ES	-2.08719	1.615*10^-6	1.61543e-06	5.883*10^-12	5.88309e-12	4.436*10^-1	0.443577	3.687*10^-2	0.0368712
ACADM|3509|ES	2.08656	7.456*10^0	7.45614	1.130*10^0	1.12963	4.921*10^1	49.2143	3.693*10^-2	0.0369281
PAICS|69358|AP	-2.08635	2.131*10^-2	0.0213069	5.732*10^-4	0.00057318	7.920*10^-1	0.792041	3.695*10^-2	0.0369472
HBS1L|77782|AP	2.08608	8.306*10^1	83.0606	1.306*10^0	1.30628	5.281*10^3	5281.44	3.697*10^-2	0.0369715
CLASRP|50387|AP	2.08559	1.856*10^1	18.556	1.192*10^0	1.19236	2.888*10^2	288.775	3.702*10^-2	0.0370157
TMEM79|8218|AP	-2.08548	8.222*10^-4	0.000822237	1.037*10^-6	1.03674e-06	6.521*10^-1	0.652116	3.703*10^-2	0.0370256
MEIS1|53805|AP	2.08489	3.899*10^0	3.89945	1.085*10^0	1.08496	1.402*10^1	14.0151	3.708*10^-2	0.0370796
TCF12|30783|AP	-2.08446	3.247*10^-1	0.324671	1.127*10^-1	0.112737	9.350*10^-1	0.935019	3.712*10^-2	0.0371183
WDR44|89938|ES	-2.08392	4.285*10^-3	0.00428488	2.539*10^-5	2.5394e-05	7.230*10^-1	0.723014	3.717*10^-2	0.0371678
FAM57B|36030|AP	-2.08351	1.194*10^-1	0.119437	1.618*10^-2	0.0161808	8.816*10^-1	0.881612	3.720*10^-2	0.0372049
LBX2|54098|AP	2.08326	1.393*10^1	13.9293	1.169*10^0	1.1687	1.660*10^2	166.017	3.723*10^-2	0.0372273
BCL2L1|58901|AD	-2.08326	1.587*10^-8	1.58673e-08	7.288*10^-16	7.28787e-16	3.455*10^-1	0.345467	3.723*10^-2	0.0372279
CLASRP|50388|AP	-2.08306	5.369*10^-2	0.0536854	3.426*10^-3	0.00342586	8.413*10^-1	0.841284	3.725*10^-2	0.0372458
PPCS|2072|AP	2.083	1.696*10^1	16.958	1.182*10^0	1.182	2.433*10^2	243.296	3.725*10^-2	0.0372511
ZNF793|49539|ES	-2.08287	3.596*10^-2	0.0359558	1.573*10^-3	0.00157311	8.218*10^-1	0.82182	3.726*10^-2	0.0372628
PPCS|2071|AP	-2.08285	5.898*10^-2	0.0589842	4.111*10^-3	0.00411144	8.462*10^-1	0.846208	3.727*10^-2	0.0372653
NDRG4|36653|ES	-2.08277	3.298*10^-2	0.032975	1.330*10^-3	0.00132967	8.178*10^-1	0.817759	3.727*10^-2	0.0372719
BEST1|16317|ES	-2.08121	2.593*10^-3	0.00259254	9.509*10^-6	9.5088e-06	7.068*10^-1	0.706848	3.741*10^-2	0.0374144
MFSD11|43689|RI	-2.08114	2.405*10^-1	0.240542	6.287*10^-2	0.0628658	9.204*10^-1	0.920384	3.742*10^-2	0.0374209
BCL2L11|54946|AP	2.08112	5.245*10^0	5.24508	1.101*10^0	1.10129	2.498*10^1	24.9805	3.742*10^-2	0.0374225
TMEM117|21282|ES	-2.08079	2.111*10^-3	0.00211079	6.372*10^-6	6.37162e-06	6.993*10^-1	0.699262	3.745*10^-2	0.0374533
MORN1|255|ES	2.08063	6.360*10^0	6.36013	1.113*10^0	1.11326	3.634*10^1	36.3359	3.747*10^-2	0.037468
BNC2|85935|AT	2.08023	3.332*10^0	3.3319	1.072*10^0	1.07206	1.036*10^1	10.3553	3.750*10^-2	0.0375042
BNC2|85934|AT	-2.08023	3.001*10^-1	0.300129	9.657*10^-2	0.0965685	9.328*10^-1	0.932783	3.750*10^-2	0.0375042
RAB7L1|9565|ES	2.08008	1.448*10^4	14484.7	1.739*10^0	1.73893	1.207*10^8	1.20653e+08	3.752*10^-2	0.0375179
PDCD6|71424|AT	2.08007	5.460*10^3	5459.66	1.644*10^0	1.6436	1.814*10^7	1.81358e+07	3.752*10^-2	0.0375188
CBWD3|86514|ES	-2.07902	1.519*10^-1	0.151932	2.571*10^-2	0.0257136	8.977*10^-1	0.89771	3.762*10^-2	0.0376153
CNOT10|63824|ES	2.07831	8.428*10^2	842.773	1.468*10^0	1.46756	4.840*10^5	483980	3.768*10^-2	0.0376812
PHLDB1|19035|AP	-2.0782	3.227*10^-1	0.322732	1.111*10^-1	0.111078	9.377*10^-1	0.937683	3.769*10^-2	0.0376908
DGKG|68045|ES	2.07735	3.486*10^0	3.48636	1.073*10^0	1.07312	1.133*10^1	11.3265	3.777*10^-2	0.0377688
CYB561D2|65048|RI	-2.07662	1.476*10^-1	0.147612	2.426*10^-2	0.0242615	8.981*10^-1	0.898103	3.784*10^-2	0.037837
FASTKD3|71526|AA	-2.07638	1.730*10^-1	0.17304	3.304*10^-2	0.0330378	9.063*10^-1	0.906325	3.786*10^-2	0.0378584
SYNJ1|60368|ES	-2.07636	2.625*10^-1	0.262494	7.427*10^-2	0.074268	9.278*10^-1	0.927765	3.786*10^-2	0.0378609
SH3BP1|62132|AT	-2.07613	9.542*10^-2	0.0954172	1.038*10^-2	0.0103836	8.768*10^-1	0.87681	3.788*10^-2	0.0378817
SH3BP1|62134|AT	2.07613	1.048*10^1	10.4803	1.140*10^0	1.1405	9.631*10^1	96.3057	3.788*10^-2	0.0378817
LUC7L|32848|ES	2.07595	2.426*10^0	2.42576	1.051*10^0	1.05076	5.600*10^0	5.60005	3.790*10^-2	0.0378983
PI4K2B|68958|AP	-2.07567	3.277*10^-1	0.327719	1.143*10^-1	0.114291	9.397*10^-1	0.939708	3.792*10^-2	0.0379248
AGTRAP|670|AA	-2.07437	2.402*10^-1	0.24016	6.240*10^-2	0.0623975	9.243*10^-1	0.924342	3.804*10^-2	0.0380447
NFU1|53853|ES	-2.07403	5.199*10^-3	0.00519949	3.610*10^-5	3.61027e-05	7.488*10^-1	0.748828	3.808*10^-2	0.0380764
ZNF608|73153|ES	-2.07402	9.449*10^-6	9.44914e-06	1.687*10^-10	1.68695e-10	5.293*10^-1	0.529276	3.808*10^-2	0.0380774
SLC47A1|39737|ES	2.07394	1.141*10^1	11.4108	1.143*10^0	1.14316	1.139*10^2	113.901	3.808*10^-2	0.0380846
KRBOX4|88888|AT	-2.07367	4.318*10^-2	0.043184	2.216*10^-3	0.00221552	8.417*10^-1	0.841727	3.811*10^-2	0.0381101
ZGPAT|60160|AP	-2.07306	2.417*10^-3	0.00241653	8.112*10^-6	8.11236e-06	7.198*10^-1	0.719843	3.817*10^-2	0.0381666
MEN1|16702|AD	2.07278	5.041*10^7	5.04086e+07	2.626*10^0	2.62564	9.678*10^14	967776643060254	3.819*10^-2	0.0381926
DCTD|71247|ES	2.07234	2.558*10^1	25.5843	1.192*10^0	1.1922	5.490*10^2	549.031	3.823*10^-2	0.0382336
BCAR3|3796|AP	2.07232	3.554*10^0	3.55434	1.071*10^0	1.07117	1.179*10^1	11.7939	3.824*10^-2	0.0382358
STRADA|42964|AD	-2.07225	3.345*10^-2	0.0334477	1.345*10^-3	0.0013449	8.318*10^-1	0.831843	3.824*10^-2	0.038242
GGNBP2|40493|AT	2.07213	7.781*10^3	7780.51	1.624*10^0	1.62412	3.727*10^7	3.72733e+07	3.825*10^-2	0.0382536
GGNBP2|40494|AT	-2.07185	1.287*10^-4	0.000128721	2.688*10^-8	2.68774e-08	6.165*10^-1	0.616464	3.828*10^-2	0.0382793
TRABD|62790|AP	-2.07178	1.315*10^-1	0.131516	1.930*10^-2	0.0192978	8.963*10^-1	0.896291	3.829*10^-2	0.0382857
ARFGAP1|60109|ES	-2.07162	3.917*10^-1	0.391684	1.614*10^-1	0.161366	9.507*10^-1	0.950738	3.830*10^-2	0.0383013
LRRC27|13499|ES	2.07105	2.387*10^1	23.8711	1.186*10^0	1.18551	4.807*10^2	480.662	3.835*10^-2	0.0383543
FAM131A|67934|ES	2.06979	3.472*10^8	3.47199e+08	2.839*10^0	2.83899	4.246*10^16	4.24612e+16	3.847*10^-2	0.0384723
ATP2C1|66764|ES	-2.06906	1.727*10^-2	0.0172689	3.694*10^-4	0.000369379	8.073*10^-1	0.807343	3.854*10^-2	0.0385407
ZNF138|115226|ES	2.06866	4.220*10^0	4.22002	1.079*10^0	1.07859	1.651*10^1	16.511	3.858*10^-2	0.0385778
AKAP17A|88393|AD	2.06838	7.053*10^0	7.05348	1.108*10^0	1.10782	4.491*10^1	44.9095	3.860*10^-2	0.0386045
CLN3|35718|ME	2.06824	2.091*10^1	20.9081	1.173*10^0	1.17252	3.728*10^2	372.827	3.862*10^-2	0.0386173
TMPRSS5|18795|ES	2.06718	3.166*10^0	3.16626	1.062*10^0	1.0616	9.443*10^0	9.44348	3.872*10^-2	0.038717
SYDE1|48053|AA	-2.06655	6.601*10^-3	0.00660055	5.644*10^-5	5.64448e-05	7.719*10^-1	0.771856	3.878*10^-2	0.0387761
TMEM136|19161|AA	-2.06655	2.331*10^-1	0.233085	5.857*10^-2	0.0585663	9.276*10^-1	0.92764	3.878*10^-2	0.0387769
CAMLG|96929|ES	-2.06615	1.841*10^-5	1.84071e-05	5.934*10^-10	5.93352e-10	5.710*10^-1	0.571027	3.881*10^-2	0.0388145
DSG2|45010|AT	-2.06571	3.263*10^-3	0.00326331	1.428*10^-5	1.42757e-05	7.460*10^-1	0.745968	3.886*10^-2	0.0388558
ZNF266|47345|ES	2.06455	3.131*10^0	3.13079	1.060*10^0	1.05952	9.251*10^0	9.25118	3.897*10^-2	0.0389651
ZNF530|52305|ES	2.06408	5.399*10^0	5.3995	1.089*10^0	1.08878	2.678*10^1	26.7772	3.901*10^-2	0.0390099
FAM63A|7539|AA	-2.06397	1.158*10^-1	0.115783	1.494*10^-2	0.0149442	8.971*10^-1	0.897052	3.902*10^-2	0.039021
TPK1|82139|ES	2.0639	9.418*10^0	9.41798	1.120*10^0	1.11956	7.923*10^1	79.2264	3.903*10^-2	0.0390276
PLXNB3|90478|ES	-2.06362	4.789*10^-2	0.0478925	2.672*10^-3	0.00267191	8.584*10^-1	0.858444	3.905*10^-2	0.0390542
LAMTOR3|70083|ES	2.06095	6.590*10^1	65.9031	1.228*10^0	1.22781	3.537*10^3	3537.38	3.931*10^-2	0.0393074
HSPB11|3097|AT	2.06083	5.738*10^1	57.3764	1.219*10^0	1.2192	2.700*10^3	2700.16	3.932*10^-2	0.0393197
FUZ|51088|ES	2.06043	5.424*10^1	54.2441	1.215*10^0	1.21498	2.422*10^3	2421.78	3.936*10^-2	0.039357
TMUB2|41804|ES	2.05982	6.284*10^0	6.28366	1.093*10^0	1.09319	3.612*10^1	36.1183	3.942*10^-2	0.0394153
PIGP|60540|AP	-2.05974	2.095*10^-1	0.209518	4.735*10^-2	0.0473503	9.271*10^-1	0.927087	3.942*10^-2	0.0394237
EPC1|11157|AP	-2.05943	7.616*10^-2	0.0761639	6.569*10^-3	0.00656914	8.831*10^-1	0.883059	3.945*10^-2	0.0394529
APBA2|29758|ES	2.05929	4.452*10^0	4.45193	1.075*10^0	1.07468	1.844*10^1	18.4424	3.947*10^-2	0.0394668
EPC1|11156|AP	2.05918	1.313*10^1	13.1252	1.132*10^0	1.13207	1.522*10^2	152.174	3.948*10^-2	0.0394772
ZNF341|59014|ES	-2.05908	2.109*10^-2	0.0210866	5.354*10^-4	0.000535411	8.305*10^-1	0.830471	3.949*10^-2	0.0394866
HIVEP1|75358|ES	-2.05825	1.096*10^-5	1.09555e-05	2.071*10^-10	2.07084e-10	5.796*10^-1	0.579589	3.957*10^-2	0.0395657
ATP6AP1L|118670|ES	-2.05787	2.123*10^-1	0.212275	4.851*10^-2	0.0485087	9.289*10^-1	0.928918	3.960*10^-2	0.0396029
ELP5|38890|RI	-2.05778	2.391*10^-2	0.0239139	6.829*10^-4	0.000682922	8.374*10^-1	0.837395	3.961*10^-2	0.0396113
MUTYH|2595|AP	-2.05768	1.164*10^-1	0.116442	1.502*10^-2	0.0150164	9.029*10^-1	0.902927	3.962*10^-2	0.0396212
CCDC53|24021|ME	-2.05754	4.856*10^-26	4.85611e-26	3.741*10^-50	3.74146e-50	6.303*10^-2	0.0630283	3.963*10^-2	0.0396343
NFYC|2020|ES	2.05679	8.039*10^3	8039.23	1.527*10^0	1.52699	4.232*10^7	4.23245e+07	3.971*10^-2	0.0397067
TPD52|84267|AP	2.05666	1.157*10^1	11.57	1.122*10^0	1.122	1.193*10^2	119.31	3.972*10^-2	0.0397192
UBOX5|58571|ES	-2.05626	1.042*10^-1	0.104231	1.208*10^-2	0.0120775	8.995*10^-1	0.899525	3.976*10^-2	0.0397577
PI4K2B|68959|AP	2.05592	3.018*10^0	3.01797	1.053*10^0	1.05291	8.650*10^0	8.65046	3.979*10^-2	0.0397903
FGFR3|68512|AA	-2.05547	8.554*10^-2	0.0855368	8.202*10^-3	0.00820201	8.920*10^-1	0.892042	3.983*10^-2	0.039834
LAT2|80068|ES	-2.05535	1.390*10^-1	0.138987	2.117*10^-2	0.0211701	9.125*10^-1	0.912488	3.985*10^-2	0.0398453
VPS33B|32535|ES	-2.05521	1.387*10^-6	1.38743e-06	3.597*10^-12	3.59664e-12	5.352*10^-1	0.535209	3.986*10^-2	0.0398585
LMO3|20614|AP	-2.05485	7.747*10^-2	0.0774702	6.754*10^-3	0.00675411	8.886*10^-1	0.88859	3.989*10^-2	0.039893
GAS8|38199|AP	-2.05465	1.819*10^-1	0.18191	3.579*10^-2	0.0357947	9.245*10^-1	0.924469	3.991*10^-2	0.0399131
UBXN11|101230|ES	2.05424	7.392*10^0	7.39172	1.096*10^0	1.09615	4.984*10^1	49.8447	3.995*10^-2	0.039952
MRPL47|67700|ES	2.05415	4.223*10^3	4222.69	1.466*10^0	1.46638	1.216*10^7	1.21599e+07	3.996*10^-2	0.0399607
FAM98C|49644|ES	2.05369	4.701*10^12	4.7013e+12	3.787*10^0	3.78725	5.836*10^24	5.83594e+24	4.001*10^-2	0.0400058
TNFRSF19|25465|AP	2.0534	4.416*10^0	4.41554	1.070*10^0	1.06992	1.822*10^1	18.2229	4.003*10^-2	0.0400335
GALNT4|23640|AP	2.05306	4.585*10^0	4.5854	1.071*10^0	1.07149	1.962*10^1	19.623	4.007*10^-2	0.040067
LETMD1|21743|ES	-2.05305	4.296*10^-1	0.429634	1.918*10^-1	0.191792	9.624*10^-1	0.962422	4.007*10^-2	0.0400682
MUTYH|2650|ES	2.05227	2.742*10^0	2.74222	1.046*10^0	1.04642	7.186*10^0	7.1862	4.014*10^-2	0.0401433
FLAD1|91160|ES	-2.05211	4.646*10^-2	0.0464567	2.477*10^-3	0.00247714	8.713*10^-1	0.871258	4.016*10^-2	0.040159
TNFRSF19|25464|AP	-2.05133	2.267*10^-1	0.226733	5.492*10^-2	0.0549207	9.360*10^-1	0.93604	4.023*10^-2	0.0402348
FAM86B1|82681|AD	2.05112	9.688*10^0	9.68795	1.106*10^0	1.10619	8.485*10^1	84.8462	4.026*10^-2	0.0402551
FAM109A|24510|ES	-2.05064	2.825*10^-2	0.0282496	9.344*10^-4	0.000934367	8.541*10^-1	0.854095	4.030*10^-2	0.040302
DFFA|616|AT	2.05043	1.895*10^1	18.9535	1.139*10^0	1.1386	3.155*10^2	315.504	4.032*10^-2	0.0403226
DFFA|617|AT	-2.05043	5.276*10^-2	0.0527608	3.170*10^-3	0.00316953	8.783*10^-1	0.878271	4.032*10^-2	0.0403226
DIP2A|60940|AT	-2.05025	1.070*10^-2	0.010704	1.399*10^-4	0.000139914	8.189*10^-1	0.818894	4.034*10^-2	0.04034
TRIT1|1926|ES	-2.05016	2.589*10^-1	0.258936	7.115*10^-2	0.0711544	9.423*10^-1	0.942287	4.035*10^-2	0.0403487
SIRPB1|58524|ES	2.04977	3.422*10^0	3.42215	1.055*10^0	1.05538	1.110*10^1	11.0966	4.039*10^-2	0.0403873
TMEM138|16186|AT	2.04962	4.407*10^1	44.0696	1.180*10^0	1.1801	1.646*10^3	1645.73	4.040*10^-2	0.0404015
TMEM138|16187|AT	-2.04957	2.269*10^-2	0.022693	6.077*10^-4	0.000607657	8.475*10^-1	0.84747	4.041*10^-2	0.0404069
PPP1R12A|23532|ES	2.04948	3.615*10^0	3.61458	1.058*10^0	1.05773	1.235*10^1	12.3521	4.042*10^-2	0.0404156
GABPB1|30577|ES	-2.0494	2.198*10^-4	0.000219797	6.977*10^-8	6.97712e-08	6.924*10^-1	0.692419	4.042*10^-2	0.0404232
KIF2A|72179|AD	2.04929	1.362*10^1	13.6196	1.121*10^0	1.12057	1.655*10^2	165.536	4.043*10^-2	0.0404336
SLC35F6|52913|ES	-2.0491	6.859*10^-5	6.85869e-05	7.138*10^-9	7.13836e-09	6.590*10^-1	0.658998	4.045*10^-2	0.0404527
GALNT4|23641|AP	-2.0482	2.186*10^-1	0.218631	5.103*10^-2	0.0510348	9.366*10^-1	0.936604	4.054*10^-2	0.0405408
STX7|77641|AT	2.04808	1.376*10^2	137.598	1.236*10^0	1.23599	1.532*10^4	15318.3	4.055*10^-2	0.0405517
STX7|77642|AT	-2.04808	7.268*10^-3	0.00726754	6.528*10^-5	6.52816e-05	8.091*10^-1	0.809067	4.055*10^-2	0.0405517
GTF2IRD2|80092|AT	2.04773	4.970*10^0	4.96976	1.071*10^0	1.07114	2.306*10^1	23.0583	4.059*10^-2	0.0405866
MTFP1|61753|AA	2.04771	3.875*10^1	38.7486	1.170*10^0	1.16965	1.284*10^3	1283.67	4.059*10^-2	0.0405886
AAMP|57456|AP	2.04735	9.087*10^5	908742	1.796*10^0	1.79606	4.598*10^11	4.59792e+11	4.062*10^-2	0.0406238
PKIG|59473|AP	-2.04718	1.407*10^-2	0.0140699	2.374*10^-4	0.000237393	8.339*10^-1	0.833896	4.064*10^-2	0.0406404
AMOTL2|66866|AP	-2.04717	1.856*10^-2	0.0185599	4.082*10^-4	0.000408232	8.438*10^-1	0.84381	4.064*10^-2	0.0406414
TNPO2|47845|AP	2.04662	8.294*10^0	8.29407	1.094*10^0	1.09371	6.290*10^1	62.8976	4.070*10^-2	0.0406955
PPT1|1992|ES	-2.04572	3.339*10^-12	3.33854e-12	3.374*10^-23	3.37439e-23	3.303*10^-1	0.330307	4.078*10^-2	0.0407841
RAB3GAP1|55429|AT	2.04513	6.463*10^1	64.6317	1.190*10^0	1.18959	3.512*10^3	3511.52	4.084*10^-2	0.0408416
SLC47A1|39742|ES	-2.04504	3.634*10^-3	0.003634	1.668*10^-5	1.66825e-05	7.916*10^-1	0.791605	4.085*10^-2	0.0408509
CRYZL1|60450|AT	2.04492	9.268*10^2	926.841	1.328*10^0	1.3282	6.468*10^5	646769	4.086*10^-2	0.0408629
WWP2|37322|ES	-2.04449	2.419*10^-1	0.241944	6.207*10^-2	0.062074	9.430*10^-1	0.943018	4.090*10^-2	0.040905
ATG4A|89854|ES	2.04404	1.124*10^1	11.2432	1.105*10^0	1.10465	1.144*10^2	114.433	4.095*10^-2	0.04095
HOPX|69369|RI	2.0438	4.437*10^0	4.43734	1.063*10^0	1.06303	1.852*10^1	18.5226	4.097*10^-2	0.0409733
KDM4C|85834|ES	-2.04333	1.318*10^-4	0.000131811	2.502*10^-8	2.50158e-08	6.945*10^-1	0.694531	4.102*10^-2	0.0410194
CCDC171|85926|AT	-2.04333	8.273*10^-2	0.0827265	7.576*10^-3	0.00757614	9.033*10^-1	0.90332	4.102*10^-2	0.04102
PFDN5|21993|AA	2.04247	4.891*10^0	4.89111	1.066*10^0	1.06622	2.244*10^1	22.4371	4.110*10^-2	0.041105
DPH2|2497|ES	-2.04195	5.882*10^-2	0.0588153	3.876*10^-3	0.00387601	8.925*10^-1	0.892475	4.116*10^-2	0.0411568
NBPF12|7361|ES	2.04041	4.073*10^0	4.07306	1.057*10^0	1.05693	1.570*10^1	15.6962	4.131*10^-2	0.0413091
SPOCD1|101010|ES	2.04037	4.426*10^0	4.42606	1.060*10^0	1.06037	1.847*10^1	18.4747	4.131*10^-2	0.0413135
APCDD1|44628|ES	-2.04029	3.422*10^-1	0.342235	1.222*10^-1	0.122175	9.587*10^-1	0.958663	4.132*10^-2	0.0413213
RPS2|534146|AA	2.04018	1.839*10^1	18.3868	1.121*10^0	1.1213	3.015*10^2	301.503	4.133*10^-2	0.0413319
IRAK3|22910|AT	-2.04017	2.195*10^-3	0.00219478	6.128*10^-6	6.12768e-06	7.861*10^-1	0.786115	4.133*10^-2	0.0413338
ZNF506|48686|ES	-2.03845	5.745*10^-2	0.0574478	3.684*10^-3	0.00368397	8.958*10^-1	0.895841	4.151*10^-2	0.0415053
TRAPPC2L|94314|AA	2.03842	2.591*10^1	25.9082	1.133*10^0	1.13344	5.922*10^2	592.212	4.151*10^-2	0.0415084
ZNF415|51691|AD	-2.03835	1.949*10^-1	0.194925	4.046*10^-2	0.0404614	9.391*10^-1	0.939058	4.152*10^-2	0.0415153
FDPS|8063|ES	-2.03748	2.977*10^-1	0.297721	9.282*10^-2	0.0928192	9.550*10^-1	0.954953	4.160*10^-2	0.0416023
SNX6|27163|ES	2.03721	9.545*10^4	95446.5	1.545*10^0	1.54462	5.898*10^9	5.89792e+09	4.163*10^-2	0.041629
KIF13A|75455|AT	2.03674	4.337*10^1	43.3706	1.153*10^0	1.15269	1.632*10^3	1631.84	4.168*10^-2	0.0416765
PPM1A|27778|ES	-2.03671	1.038*10^-1	0.103788	1.173*10^-2	0.0117318	9.182*10^-1	0.91818	4.168*10^-2	0.0416793
ABHD17A|46556|ES	2.03653	7.467*10^1	74.6712	1.176*10^0	1.17605	4.741*10^3	4741.13	4.170*10^-2	0.041697
TOMM40L|8618|ES	2.03556	5.012*10^1	50.1225	1.156*10^0	1.15648	2.172*10^3	2172.35	4.179*10^-2	0.0417944
CRELD2|390167|ES	2.03552	7.629*10^6	7.62936e+06	1.801*10^0	1.80088	3.232*10^13	3.23214e+13	4.180*10^-2	0.0417981
RPL32|63469|AA	-2.0348	9.338*10^-2	0.0933752	9.513*10^-3	0.00951344	9.165*10^-1	0.916486	4.187*10^-2	0.0418707
SNED1|58306|AT	-2.03456	4.329*10^-2	0.0432926	2.103*10^-3	0.00210292	8.913*10^-1	0.891261	4.190*10^-2	0.0418951
SNED1|58307|AT	2.03456	2.310*10^1	23.0986	1.122*10^0	1.12201	4.755*10^2	475.53	4.190*10^-2	0.0418951
ARHGEF7|26280|AP	2.03431	2.553*10^0	2.55251	1.035*10^0	1.03484	6.296*10^0	6.29597	4.192*10^-2	0.0419203
RBM6|64939|ES	2.03384	3.989*10^0	3.98919	1.052*10^0	1.05154	1.513*10^1	15.1336	4.197*10^-2	0.0419679
KIAA1147|82046|AP	-2.03377	8.061*10^-6	8.06076e-06	9.945*10^-11	9.94513e-11	6.533*10^-1	0.653343	4.197*10^-2	0.0419744
RPS6KB2|17205|ES	-2.03375	7.136*10^-3	0.00713612	6.093*10^-5	6.09261e-05	8.358*10^-1	0.835836	4.198*10^-2	0.0419767
SLC37A3|81990|ES	2.03314	4.896*10^7	4.89597e+07	1.891*10^0	1.89129	1.267*10^15	1267416837674440	4.204*10^-2	0.0420387
ANKRD9|29419|RI	-2.03299	7.097*10^-2	0.0709683	5.539*10^-3	0.0055386	9.093*10^-1	0.909344	4.205*10^-2	0.0420533
ELN|80053|ES	2.03259	2.780*10^2	278.038	1.223*10^0	1.22272	6.322*10^4	63224	4.209*10^-2	0.0420942
DLGAP1|44516|AP	2.03227	4.480*10^0	4.47955	1.055*10^0	1.0548	1.902*10^1	19.0238	4.213*10^-2	0.0421259
MFSD12|46699|ES	-2.03141	2.308*10^-1	0.230803	5.609*10^-2	0.0560887	9.497*10^-1	0.949742	4.221*10^-2	0.0422138
C19orf48|51223|ES	2.03087	3.844*10^1	38.4381	1.136*10^0	1.13588	1.301*10^3	1300.74	4.227*10^-2	0.042268
GPR56|271423|ES	2.03082	1.326*10^1	13.2638	1.094*10^0	1.09439	1.608*10^2	160.754	4.227*10^-2	0.042273
ARMC10|81158|ES	-2.03037	4.159*10^-2	0.0415947	1.932*10^-3	0.00193181	8.956*10^-1	0.895596	4.232*10^-2	0.0423188
ADK|12259|ES	2.03035	1.797*10^5	179730	1.521*10^0	1.52108	2.124*10^10	2.12368e+10	4.232*10^-2	0.0423214
SMN2|72408|AT	2.03035	2.058*10^2	205.8	1.203*10^0	1.2028	3.521*10^4	35212.4	4.232*10^-2	0.0423215
ZNF461|49408|ES	2.02953	6.068*10^0	6.06778	1.064*10^0	1.06375	3.461*10^1	34.6114	4.240*10^-2	0.0424041
POLR1C|76303|ES	-2.02918	1.891*10^-9	1.89106e-09	7.095*10^-18	7.09535e-18	5.040*10^-1	0.504006	4.244*10^-2	0.0424397
ATXN3|28978|ES	-2.02908	2.721*10^-4	0.000272096	9.792*10^-8	9.79234e-08	7.561*10^-1	0.756064	4.245*10^-2	0.0424502
GK|88735|ES	-2.02871	3.085*10^-1	0.308483	9.903*10^-2	0.0990309	9.609*10^-1	0.960929	4.249*10^-2	0.0424876
IL17RC|63263|AD	-2.02807	2.283*10^-5	2.2834e-05	7.465*10^-10	7.46513e-10	6.984*10^-1	0.698433	4.255*10^-2	0.0425527
ADORA1|9442|ES	-2.02792	1.985*10^-1	0.198485	4.159*10^-2	0.04159	9.473*10^-1	0.947253	4.257*10^-2	0.0425682
SEC61A2|10764|ES	-2.02788	2.637*10^-2	0.0263696	7.854*10^-4	0.000785393	8.854*10^-1	0.885362	4.257*10^-2	0.0425725
RPL8|85646|AD	2.02783	4.369*10^5	436913	1.544*10^0	1.54444	1.236*10^11	1.236e+11	4.258*10^-2	0.0425775
SMARCA4|47608|AP	2.02773	4.941*10^0	4.94094	1.055*10^0	1.05484	2.314*10^1	23.1437	4.259*10^-2	0.0425877
SUCO|9012|ES	-2.02761	2.190*10^-1	0.219042	5.047*10^-2	0.0504725	9.506*10^-1	0.950604	4.260*10^-2	0.0426005
C5orf22|71634|ES	2.02628	3.839*10^8	3.83872e+08	1.910*10^0	1.90964	7.717*10^16	7.71653e+16	4.274*10^-2	0.0427359
IP6K2|64760|ES	2.02615	3.002*10^0	3.00198	1.037*10^0	1.03656	8.694*10^0	8.69397	4.275*10^-2	0.0427489
NUP160|15810|ES	-2.0257	6.094*10^-2	0.0609393	4.067*10^-3	0.00406657	9.132*10^-1	0.913203	4.280*10^-2	0.0427953
SPTAN1|87772|ES	-2.02565	2.023*10^-1	0.202327	4.311*10^-2	0.0431131	9.495*10^-1	0.949506	4.280*10^-2	0.0428008
COPS8|58099|ES	2.02557	3.365*10^1	33.6533	1.121*10^0	1.12062	1.011*10^3	1010.64	4.281*10^-2	0.0428088
DCTN1|54045|ES	2.02548	6.406*10^0	6.40638	1.062*10^0	1.06191	3.865*10^1	38.6488	4.282*10^-2	0.0428185
CD58|4361|AT	2.02532	3.959*10^1	39.5897	1.126*10^0	1.12604	1.392*10^3	1391.91	4.283*10^-2	0.0428343
TPD52L2|60170|ES	2.02411	3.423*10^1	34.2321	1.118*10^0	1.11848	1.048*10^3	1047.7	4.296*10^-2	0.0429589
PKP4|55684|ES	-2.02326	4.467*10^-2	0.0446748	2.200*10^-3	0.00219966	9.073*10^-1	0.907337	4.305*10^-2	0.0430464
CTNS|38474|ES	2.02306	2.439*10^1	24.3894	1.105*10^0	1.10475	5.384*10^2	538.437	4.307*10^-2	0.0430668
PDE4DIP|4410|AT	2.02268	9.369*10^0	9.36894	1.072*10^0	1.07183	8.189*10^1	81.8943	4.311*10^-2	0.0431064
HYAL2|65008|ES	-2.02245	1.161*10^-1	0.116056	1.440*10^-2	0.0143956	9.356*10^-1	0.935627	4.313*10^-2	0.0431301
PRKAB1|24709|ES	2.02235	2.335*10^2	233.476	1.183*10^0	1.18318	4.607*10^4	46071.7	4.314*10^-2	0.0431406
TRIM16|39367|ES	2.02224	3.935*10^0	3.93528	1.043*10^0	1.04309	1.485*10^1	14.8467	4.315*10^-2	0.0431517
IL2RG|89396|ES	-2.02163	9.163*10^-6	9.16259e-06	1.196*10^-10	1.19592e-10	7.020*10^-1	0.701998	4.322*10^-2	0.043215
WDR19|69049|AA	-2.02134	2.290*10^-4	0.000229031	6.766*10^-8	6.76565e-08	7.753*10^-1	0.775316	4.325*10^-2	0.043245
VEGFA|76329|ES	2.02124	1.700*10^1	17.0034	1.090*10^0	1.0897	2.653*10^2	265.316	4.325*10^-2	0.0432544
TADA2A|40522|AD	-2.02122	2.716*10^-2	0.0271556	8.226*10^-4	0.000822591	8.965*10^-1	0.89647	4.326*10^-2	0.043257
ANTXR1|53845|AT	-2.02107	3.901*10^-2	0.0390055	1.678*10^-3	0.00167821	9.066*10^-1	0.906579	4.327*10^-2	0.0432729
ZNF506|48681|AT	-2.02034	1.981*10^-1	0.198119	4.120*10^-2	0.0411968	9.528*10^-1	0.95277	4.335*10^-2	0.0433477
IKBKB|83600|ES	-2.02016	1.829*10^-1	0.182888	3.518*10^-2	0.0351848	9.506*10^-1	0.950637	4.337*10^-2	0.0433668
TRIM41|75050|RI	-2.01878	5.352*10^-2	0.0535175	3.119*10^-3	0.00311915	9.182*10^-1	0.918238	4.351*10^-2	0.0435101
TTC26|81942|AT	2.01857	5.364*10^4	53642	1.372*10^0	1.37188	2.097*10^9	2.09746e+09	4.353*10^-2	0.0435318
IL10RB|60397|ES	-2.01839	3.072*10^-6	3.07243e-06	1.363*10^-11	1.36315e-11	6.925*10^-1	0.692503	4.355*10^-2	0.0435503
FNTA|83757|ES	2.01816	6.942*10^5	694240	1.474*10^0	1.47383	3.270*10^11	3.27018e+11	4.357*10^-2	0.0435746
ARNTL|14443|AA	-2.01599	4.264*10^-2	0.0426437	1.985*10^-3	0.00198512	9.161*10^-1	0.916061	4.380*10^-2	0.0438013
MRPL55|10174|ES	2.01584	5.721*10^0	5.72136	1.050*10^0	1.04953	3.119*10^1	31.1891	4.382*10^-2	0.0438169
KRBOX4|88886|AT	2.01562	2.198*10^1	21.9766	1.089*10^0	1.08907	4.435*10^2	443.472	4.384*10^-2	0.0438395
FAM21C|11376|AA	-2.01561	3.354*10^-3	0.0033543	1.317*10^-5	1.31677e-05	8.545*10^-1	0.854464	4.384*10^-2	0.0438413
ZNF324|52465|RI	2.01547	3.758*10^3	3757.6	1.254*10^0	1.25446	1.126*10^7	1.12554e+07	4.386*10^-2	0.0438551
CGREF1|52938|ES	2.01546	4.133*10^1	41.3273	1.108*10^0	1.1079	1.542*10^3	1541.61	4.386*10^-2	0.0438569
B4GALT2|2514|AP	2.01333	2.552*10^0	2.55231	1.025*10^0	1.02515	6.354*10^0	6.35447	4.408*10^-2	0.0440796
DUS4L|81345|ES	2.01326	7.959*10^0	7.95919	1.056*10^0	1.05645	5.996*10^1	59.964	4.409*10^-2	0.0440875
TNK2|96638|ES	-2.01282	5.705*10^-2	0.0570529	3.509*10^-3	0.00350924	9.276*10^-1	0.927561	4.413*10^-2	0.0441339
PLEKHM1|41969|AP	-2.01264	2.025*10^-2	0.0202484	4.541*10^-4	0.000454052	9.030*10^-1	0.902975	4.415*10^-2	0.0441528
PAM|72899|ES	-2.01249	4.022*10^-2	0.0402172	1.759*10^-3	0.00175892	9.196*10^-1	0.919557	4.417*10^-2	0.0441688
IGSF11|66275|AD	-2.01189	1.263*10^-4	0.000126321	2.012*10^-8	2.01174e-08	7.932*10^-1	0.793196	4.423*10^-2	0.0442315
PRPF4B|75201|AP	-2.01178	2.612*10^-7	2.61246e-07	1.008*10^-13	1.00841e-13	6.768*10^-1	0.676803	4.424*10^-2	0.0442436
RAD51D|40256|ES	-2.01166	9.801*10^-2	0.0980102	1.020*10^-2	0.0101968	9.421*10^-1	0.942059	4.426*10^-2	0.0442559
GTF2I|80088|ES	-2.0115	3.750*10^-1	0.374961	1.442*10^-1	0.144174	9.752*10^-1	0.975179	4.427*10^-2	0.0442723
MXRA8|146|ES	-2.00958	1.126*10^-2	0.0112589	1.416*10^-4	0.000141611	8.951*10^-1	0.895147	4.448*10^-2	0.0444759
FOXJ3|2064|AP	-2.00956	3.618*10^-1	0.361809	1.342*10^-1	0.134232	9.752*10^-1	0.975221	4.448*10^-2	0.0444777
NF2|61629|ES	-2.0093	1.221*10^-3	0.00122128	1.759*10^-6	1.75856e-06	8.482*10^-1	0.848156	4.451*10^-2	0.0445057
PARP10|85520|AD	-2.00922	1.573*10^-3	0.00157343	2.900*10^-6	2.90008e-06	8.537*10^-1	0.853658	4.451*10^-2	0.0445141
SMIM8|76952|ES	2.0089	1.744*10^1	17.4353	1.072*10^0	1.07212	2.835*10^2	283.541	4.455*10^-2	0.0445476
PTPRN|57680|ES	-2.00882	1.110*10^-1	0.110963	1.299*10^-2	0.0129891	9.479*10^-1	0.947936	4.456*10^-2	0.0445565
MRPL43|12858|ES	2.00863	2.035*10^8	2.03549e+08	1.590*10^0	1.58966	2.606*10^16	2.60634e+16	4.458*10^-2	0.0445764
MACF1|1881|ES	2.00846	2.778*10^1	27.7808	1.084*10^0	1.08357	7.123*10^2	712.252	4.459*10^-2	0.0445949
CP|67213|AT	2.00809	8.732*10^0	8.73211	1.053*10^0	1.05331	7.239*10^1	72.3904	4.463*10^-2	0.0446333
CP|67214|AT	-2.00791	1.145*10^-1	0.114539	1.382*10^-2	0.0138157	9.496*10^-1	0.949578	4.465*10^-2	0.0446532
CSF2RA|88373|ES	2.00703	1.133*10^17	1.13282e+17	2.511*10^0	2.51137	5.110*10^33	5.10993e+33	4.475*10^-2	0.0447467
MRPL52|26638|ES	2.00699	3.611*10^0	3.61146	1.031*10^0	1.03055	1.266*10^1	12.656	4.475*10^-2	0.0447503
CC2D2A|68812|ES	-2.00674	1.781*10^-2	0.0178061	3.483*10^-4	0.000348267	9.104*10^-1	0.910386	4.478*10^-2	0.0447778
UIMC1|74696|ES	2.00653	3.500*10^0	3.49953	1.029*10^0	1.02949	1.190*10^1	11.8958	4.480*10^-2	0.0448001
HMGCR|72514|AP	-2.00639	1.350*10^-2	0.0135028	2.014*10^-4	0.00020142	9.052*10^-1	0.905198	4.482*10^-2	0.0448151
ZNF799|47798|AP	2.00596	4.926*10^0	4.92556	1.037*10^0	1.03724	2.339*10^1	23.3901	4.486*10^-2	0.0448602
RHCE|1187|ES	2.00592	2.227*10^1	22.267	1.074*10^0	1.07369	4.618*10^2	461.791	4.486*10^-2	0.0448644
C4orf29|70560|ME	-2.00572	3.862*10^-2	0.0386203	1.606*10^-3	0.00160648	9.284*10^-1	0.928449	4.489*10^-2	0.0448856
RNF157|43576|ES	2.0057	2.580*10^2	258.013	1.135*10^0	1.13498	5.865*10^4	58653.4	4.489*10^-2	0.0448886
RBPJ|68987|ES	2.00554	2.388*10^1	23.8831	1.075*10^0	1.07478	5.307*10^2	530.718	4.491*10^-2	0.0449051
PANK2|58614|AD	2.00415	3.293*10^1	32.934	1.080*10^0	1.08008	1.004*10^3	1004.23	4.505*10^-2	0.0450545
FHOD3|45260|ES	-2.00412	1.680*10^-1	0.168028	2.937*10^-2	0.0293651	9.615*10^-1	0.961467	4.506*10^-2	0.0450575
NIT1|8555|AT	-2.00405	1.932*10^-2	0.0193212	4.072*10^-4	0.000407168	9.168*10^-1	0.916844	4.506*10^-2	0.0450647
NIT1|8556|AT	2.00368	5.172*10^1	51.721	1.090*10^0	1.08989	2.454*10^3	2454.42	4.510*10^-2	0.0451049
ERLIN2|83343|AP	2.00296	7.170*10^0	7.17023	1.043*10^0	1.0432	4.928*10^1	49.2833	4.518*10^-2	0.0451813
HNRNPLL|53264|RI	-2.00289	2.320*10^-1	0.231953	5.551*10^-2	0.0555137	9.692*10^-1	0.969167	4.519*10^-2	0.0451889
TTLL5|28523|ES	-2.00229	1.640*10^-1	0.164016	2.795*10^-2	0.027949	9.625*10^-1	0.962505	4.525*10^-2	0.0452534
FKBP11|21496|AT	-2.00213	1.409*10^-1	0.140851	2.068*10^-2	0.020675	9.596*10^-1	0.959559	4.527*10^-2	0.0452706
RTKN|54056|AP	2.0021	1.189*10^1	11.8875	1.053*10^0	1.05348	1.341*10^2	134.139	4.527*10^-2	0.0452738
RTKN|54057|AP	-2.00194	8.414*10^-2	0.0841368	7.456*10^-3	0.00745609	9.494*10^-1	0.949427	4.529*10^-2	0.0452916
U2AF1|60778|ES	2.00162	9.726*10^0	9.7262	1.048*10^0	1.04848	9.022*10^1	90.2247	4.533*10^-2	0.0453255
SLC39A6|45211|AD	-2.00108	5.654*10^-2	0.0565398	3.391*10^-3	0.00339113	9.427*10^-1	0.942679	4.538*10^-2	0.0453836
OCIAD1|69238|AD	-2.00046	2.903*10^-1	0.290334	8.643*10^-2	0.0864308	9.753*10^-1	0.975273	4.545*10^-2	0.0454501
REPS1|77951|AA	-1.99962	9.372*10^-2	0.0937225	9.206*10^-3	0.00920621	9.541*10^-1	0.95413	4.554*10^-2	0.0455408
RPL15|63732|AD	1.99914	1.183*10^2	118.265	1.098*10^0	1.09803	1.274*10^4	12737.8	4.559*10^-2	0.0455937
TAB1|62302|AT	1.99908	3.352*10^3	3351.88	1.172*10^0	1.17216	9.585*10^6	9.58497e+06	4.560*10^-2	0.0455992
FAM71D|28041|AT	-1.99868	2.581*10^-1	0.258074	6.837*10^-2	0.0683727	9.741*10^-1	0.974103	4.564*10^-2	0.0456429
PUS1|25226|ES	1.99849	1.783*10^3	1782.99	1.155*10^0	1.15525	2.752*10^6	2.75184e+06	4.566*10^-2	0.0456634
HNRNPAB|74844|ES	1.99787	4.559*10^1	45.5932	1.075*10^0	1.07516	1.933*10^3	1933.43	4.573*10^-2	0.0457312
SLC7A7|26626|ES	-1.99758	1.566*10^-9	1.5657e-09	3.591*10^-18	3.59097e-18	6.827*10^-1	0.682658	4.576*10^-2	0.0457626
FBP1|86936|AP	1.99746	4.132*10^1	41.3205	1.072*10^0	1.07235	1.592*10^3	1592.2	4.578*10^-2	0.0457757
RPL21|25526|AD	-1.99727	1.603*10^-1	0.160346	2.661*10^-2	0.0266051	9.664*10^-1	0.966388	4.580*10^-2	0.0457958
CCDC40|44017|AT	-1.99709	2.089*10^-1	0.208939	4.494*10^-2	0.0449446	9.713*10^-1	0.971315	4.582*10^-2	0.0458158
ANTXR2|69666|AT	1.99706	6.087*10^1	60.8657	1.079*10^0	1.0793	3.432*10^3	3432.45	4.582*10^-2	0.0458192
ARL5A|55597|AD	1.99598	1.312*10^2	131.248	1.092*10^0	1.09199	1.577*10^4	15774.8	4.594*10^-2	0.045936
ZNF584|52456|ES	1.99541	3.323*10^0	3.32347	1.022*10^0	1.02156	1.081*10^1	10.8123	4.600*10^-2	0.0459987
ANKS6|87045|RI	1.99517	5.827*10^0	5.82656	1.032*10^0	1.03159	3.291*10^1	32.9092	4.602*10^-2	0.0460239
RPS6|659410|ES	-1.99499	1.402*10^-1	0.14018	2.034*10^-2	0.02034	9.661*10^-1	0.966095	4.604*10^-2	0.0460444
SEC13|63359|AA	-1.9948	2.813*10^-4	0.000281276	9.126*10^-8	9.12579e-08	8.669*10^-1	0.866949	4.606*10^-2	0.0460649
ALAS1|65183|ES	-1.99437	1.073*10^-1	0.107288	1.196*10^-2	0.0119627	9.622*10^-1	0.962222	4.611*10^-2	0.0461116
PIGQ|32900|AP	-1.99372	9.420*10^-2	0.0942001	9.236*10^-3	0.00923579	9.608*10^-1	0.960789	4.618*10^-2	0.0461824
INPP5B|1850|AA	-1.99367	1.925*10^-1	0.192536	3.812*10^-2	0.0381173	9.725*10^-1	0.972528	4.619*10^-2	0.0461877
MED22|88032|AD	-1.9935	9.661*10^-2	0.0966135	9.708*10^-3	0.0097084	9.615*10^-1	0.961453	4.621*10^-2	0.0462073
SMEK2|53624|ES	1.99274	2.681*10^3	2680.88	1.139*10^0	1.13865	6.312*10^6	6.312e+06	4.629*10^-2	0.0462898
FCGR2B|8677|AP	1.99209	1.601*10^1	16.0114	1.046*10^0	1.04574	2.452*10^2	245.15	4.636*10^-2	0.046361
LRWD1|81100|AD	-1.99192	4.489*10^-2	0.044888	2.118*10^-3	0.00211779	9.514*10^-1	0.95143	4.638*10^-2	0.0463799
RASA4|81122|ES	1.99189	6.310*10^0	6.31031	1.030*10^0	1.02997	3.866*10^1	38.6615	4.638*10^-2	0.0463832
ZKSCAN7|64371|ES	-1.99153	1.446*10^-2	0.0144554	2.235*10^-4	0.000223474	9.351*10^-1	0.935052	4.642*10^-2	0.0464226
BPNT1|9867|AD	1.99061	6.509*10^1	65.0869	1.066*10^0	1.06639	3.973*10^3	3972.57	4.652*10^-2	0.0465243
GOLPH3L|7504|ES	-1.99043	2.318*10^-3	0.00231806	5.896*10^-6	5.89632e-06	9.113*10^-1	0.911316	4.654*10^-2	0.0465435
UBE2Q2|31891|ES	-1.99026	5.240*10^-4	0.000524044	3.081*10^-7	3.08082e-07	8.914*10^-1	0.891393	4.656*10^-2	0.0465628
ASIC4|57717|ES	1.99004	1.334*10^1	13.3409	1.040*10^0	1.03994	1.711*10^2	171.144	4.659*10^-2	0.046586
ETFA|31946|ES	1.98991	1.575*10^1	15.7481	1.042*10^0	1.04236	2.379*10^2	237.923	4.660*10^-2	0.0466004
BCL2L11|54945|AP	-1.9897	1.922*10^-1	0.192158	3.785*10^-2	0.0378463	9.756*10^-1	0.975649	4.662*10^-2	0.0466238
LSM7|46607|AA	-1.9896	9.274*10^-4	0.000927388	9.543*10^-7	9.54329e-07	9.012*10^-1	0.901208	4.663*10^-2	0.046635
QKI|97339|ES	1.98908	4.706*10^0	4.70594	1.023*10^0	1.02293	2.165*10^1	21.6495	4.669*10^-2	0.0466924
FCGR2B|8678|AP	-1.98906	6.281*10^-2	0.0628081	4.108*10^-3	0.00410781	9.603*10^-1	0.960329	4.670*10^-2	0.0466951
MLH1|63951|AA	-1.98883	3.799*10^-2	0.0379884	1.513*10^-3	0.00151326	9.536*10^-1	0.953647	4.672*10^-2	0.0467204
ATXN2L|35842|AA	-1.98833	2.734*10^-1	0.273425	7.616*10^-2	0.0761574	9.817*10^-1	0.98167	4.678*10^-2	0.0467751
TMEM218|19278|ES	-1.9883	5.238*10^-2	0.0523829	2.862*10^-3	0.00286176	9.588*10^-1	0.958838	4.678*10^-2	0.0467783
LRRCC1|84323|AD	1.9881	5.536*10^0	5.53626	1.025*10^0	1.02451	2.992*10^1	29.9168	4.680*10^-2	0.0468007
PLA2G7|76422|AT	-1.98795	1.635*10^-2	0.016349	2.832*10^-4	0.000283227	9.437*10^-1	0.943726	4.682*10^-2	0.0468167
SLC48A1|21358|AP	-1.98775	3.156*10^-3	0.00315606	1.080*10^-5	1.07957e-05	9.227*10^-1	0.922659	4.684*10^-2	0.0468393
ADAMTS10|47255|AD	1.98775	4.340*10^0	4.33996	1.021*10^0	1.02073	1.845*10^1	18.4528	4.684*10^-2	0.0468397
ZNF664|25127|ES	1.98738	1.503*10^2	150.33	1.072*10^0	1.0716	2.109*10^4	21089.3	4.688*10^-2	0.0468804
TBC1D7|75375|AT	1.98709	6.371*10^1	63.7053	1.058*10^0	1.05834	3.835*10^3	3834.66	4.691*10^-2	0.0469129
ORMDL1|56535|AT	-1.98665	2.223*10^-4	0.000222308	5.533*10^-8	5.5333e-08	8.932*10^-1	0.893151	4.696*10^-2	0.0469609
ORMDL1|56536|AT	1.98665	4.498*10^3	4498.27	1.120*10^0	1.11963	1.807*10^7	1.80724e+07	4.696*10^-2	0.0469609
DBF4B|41886|RI	-1.98659	8.037*10^-4	0.000803689	7.107*10^-7	7.10652e-07	9.089*10^-1	0.908906	4.697*10^-2	0.0469678
NME4|32873|AP	1.98657	1.615*10^1	16.1468	1.038*10^0	1.03796	2.512*10^2	251.184	4.697*10^-2	0.0469702
MAPKAP1|87579|AT	-1.98635	1.653*10^-4	0.000165275	3.067*10^-8	3.06652e-08	8.908*10^-1	0.890775	4.699*10^-2	0.0469947
FAM149A|71401|ES	-1.98626	1.483*10^-1	0.148311	2.256*10^-2	0.022559	9.751*10^-1	0.975052	4.700*10^-2	0.0470046
YY1AP1|8107|ES	1.98598	4.288*10^8	4.28773e+08	1.297*10^0	1.29747	1.417*10^17	1.41695e+17	4.704*10^-2	0.0470351
TRIO|71584|AT	-1.98587	5.823*10^-4	0.000582321	3.737*10^-7	3.73699e-07	9.074*10^-1	0.907408	4.705*10^-2	0.0470479
MTFR1L|1210|AA	1.98585	1.264*10^1	12.6367	1.034*10^0	1.03361	1.545*10^2	154.493	4.705*10^-2	0.0470504
CCDC51|64651|ES	1.98582	3.249*10^0	3.24886	1.015*10^0	1.01546	1.039*10^1	10.3944	4.705*10^-2	0.047053
NUP160|15800|AP	1.98566	2.025*10^1	20.253	1.040*10^0	1.0397	3.945*10^2	394.523	4.707*10^-2	0.0470708
SCYL1|16856|AA	-1.98537	2.223*10^-1	0.222256	5.036*10^-2	0.0503573	9.809*10^-1	0.980941	4.710*10^-2	0.0471036
LRRC27|13491|AP	-1.9852	3.031*10^-1	0.303128	9.329*10^-2	0.0932916	9.849*10^-1	0.98494	4.712*10^-2	0.047122
NOX4|18232|AD	-1.98438	2.017*10^-4	0.000201653	4.515*10^-8	4.51523e-08	9.006*10^-1	0.900598	4.721*10^-2	0.0472135
PSEN2|10032|AA	1.98435	2.192*10^1	21.9215	1.039*10^0	1.03866	4.627*10^2	462.664	4.722*10^-2	0.0472173
SUN1|78537|ES	1.98418	1.168*10^1	11.6821	1.030*10^0	1.03046	1.324*10^2	132.437	4.724*10^-2	0.0472356
NDUFC1|70617|AP	-1.98357	2.519*10^-1	0.251893	6.450*10^-2	0.0644997	9.837*10^-1	0.983724	4.730*10^-2	0.0473035
NDUFC1|70618|AP	1.98348	3.970*10^0	3.96975	1.016*10^0	1.01648	1.550*10^1	15.5034	4.731*10^-2	0.0473135
HYAL1|64995|RI	-1.9832	9.746*10^-3	0.00974584	1.003*10^-4	0.000100277	9.472*10^-1	0.947185	4.734*10^-2	0.0473449
ACHE|81032|ES	1.98295	4.604*10^2	460.366	1.074*10^0	1.07366	1.974*10^5	197396	4.737*10^-2	0.0473731
MRPS25|63542|ES	-1.98242	5.193*10^-1	0.51927	2.717*10^-1	0.27165	9.926*10^-1	0.992604	4.743*10^-2	0.047432
SGMS1|11570|AP	1.98217	3.102*10^1	31.0192	1.039*10^0	1.03922	9.259*10^2	925.877	4.746*10^-2	0.0474607
HSPA4L|70541|AP	-1.98214	5.700*10^-2	0.0570032	3.355*10^-3	0.00335519	9.685*10^-1	0.968459	4.746*10^-2	0.0474636
CBWD1|85685|AT	-1.98191	9.079*10^-3	0.00907869	8.683*10^-5	8.68267e-05	9.493*10^-1	0.949278	4.749*10^-2	0.0474898
DMTF1|80307|ES	-1.9814	1.492*10^-8	1.49241e-08	2.707*10^-16	2.70674e-16	8.229*10^-1	0.822869	4.755*10^-2	0.0475464
TMEM161B|72738|RI	-1.98093	8.789*10^-2	0.0878888	7.926*10^-3	0.00792585	9.746*10^-1	0.974588	4.760*10^-2	0.0475988
TPCN2|101162|ES	1.98085	4.083*10^0	4.08253	1.015*10^0	1.01494	1.642*10^1	16.4216	4.761*10^-2	0.0476081
UPF3A|93460|ES	-1.98077	6.530*10^-2	0.0653019	4.388*10^-3	0.00438833	9.717*10^-1	0.971746	4.762*10^-2	0.0476172
PRUNE2|86643|ES	1.98042	4.458*10^0	4.45828	1.016*10^0	1.01556	1.957*10^1	19.5718	4.766*10^-2	0.0476565
RPL38|43233|AD	-1.97997	9.693*10^-5	9.69319e-05	1.032*10^-8	1.03155e-08	9.108*10^-1	0.910844	4.771*10^-2	0.0477068
FGF1|73871|AP	-1.97945	1.054*10^-1	0.105405	1.136*10^-2	0.011359	9.781*10^-1	0.97809	4.776*10^-2	0.0477649
NAT14|52109|RI	-1.979	7.304*10^-2	0.073041	5.471*10^-3	0.00547096	9.751*10^-1	0.975148	4.782*10^-2	0.0478164
ZNF630|88950|AP	-1.97897	5.195*10^-2	0.0519544	2.777*10^-3	0.00277704	9.720*10^-1	0.971991	4.782*10^-2	0.0478189
SMUG1|22125|RI	-1.97778	1.981*10^-1	0.198087	3.981*10^-2	0.0398149	9.855*10^-1	0.985518	4.795*10^-2	0.0479531
ACIN1|26706|ES	1.97593	4.049*10^0	4.0489	1.011*10^0	1.01136	1.621*10^1	16.2094	4.816*10^-2	0.0481631
ANTXR1|53844|AT	1.97587	2.397*10^1	23.9728	1.026*10^0	1.02591	5.602*10^2	560.18	4.817*10^-2	0.0481693
DYNLT3|88789|AT	1.97559	1.805*10^6	1.805e+06	1.121*10^0	1.12068	2.907*10^12	2.90717e+12	4.820*10^-2	0.0482014
KLC1|29470|RI	-1.97557	8.216*10^-2	0.0821639	6.886*10^-3	0.00688554	9.804*10^-1	0.980448	4.820*10^-2	0.048203
AKAP11|25751|ES	-1.97505	1.919*10^-1	0.191946	3.731*10^-2	0.0373108	9.875*10^-1	0.987471	4.826*10^-2	0.0482624
FAM211B|61457|ES	1.97499	4.315*10^0	4.31481	1.011*10^0	1.01119	1.841*10^1	18.4116	4.827*10^-2	0.0482689
B4GALT4|66283|AP	1.97492	3.237*10^0	3.23745	1.009*10^0	1.00894	1.039*10^1	10.3882	4.828*10^-2	0.0482767
IL15RA|10679|ES	1.9745	3.622*10^0	3.62158	1.010*10^0	1.00952	1.299*10^1	12.9922	4.832*10^-2	0.0483246
PSME1|26851|RI	-1.97406	2.237*10^-1	0.223748	5.060*10^-2	0.050601	9.894*10^-1	0.989368	4.838*10^-2	0.0483752
MFSD11|43677|ES	1.97372	1.204*10^2	120.359	1.034*10^0	1.03395	1.401*10^4	14010.6	4.841*10^-2	0.0484136
TMEM116|24564|ES	1.9732	5.692*10^0	5.69154	1.012*10^0	1.01173	3.202*10^1	32.0179	4.847*10^-2	0.0484727
NRL|26810|AP	1.97296	8.353*10^0	8.3531	1.014*10^0	1.01408	6.881*10^1	68.8052	4.850*10^-2	0.0484996
ATP5S|27465|AP	-1.97236	8.435*10^-5	8.43488e-05	7.547*10^-9	7.54673e-09	9.428*10^-1	0.942756	4.857*10^-2	0.0485687
KIN|10723|ES	-1.97229	1.096*10^-1	0.109645	1.219*10^-2	0.0121893	9.863*10^-1	0.986284	4.858*10^-2	0.0485769
TRAPPC4|19065|ES	-1.972	8.807*10^-3	0.00880738	7.984*10^-5	7.98436e-05	9.715*10^-1	0.971522	4.861*10^-2	0.0486092
NID2|27539|ES	-1.97157	2.347*10^-1	0.23465	5.553*10^-2	0.0555327	9.915*10^-1	0.991502	4.866*10^-2	0.0486586
HEYL|1899|AP	1.97085	2.340*10^0	2.33997	1.005*10^0	1.00471	5.450*10^0	5.44981	4.874*10^-2	0.0487413
KCNIP3|54502|AP	1.97018	2.450*10^0	2.4497	1.005*10^0	1.00466	5.973*10^0	5.97324	4.882*10^-2	0.0488179
MTMR10|29794|ES	-1.97006	8.414*10^-2	0.0841384	7.170*10^-3	0.00716967	9.874*10^-1	0.987391	4.883*10^-2	0.0488311
BCL2L12|51035|ES	1.96997	1.880*10^1	18.8026	1.015*10^0	1.01502	3.483*10^2	348.306	4.884*10^-2	0.0488417
ZSCAN2|32293|RI	-1.9698	3.132*10^-5	3.13156e-05	1.033*10^-9	1.03279e-09	9.495*10^-1	0.949533	4.886*10^-2	0.0488614
TRIQK|84513|ES	-1.96968	1.192*10^-1	0.119242	1.437*10^-2	0.0143687	9.896*10^-1	0.989562	4.887*10^-2	0.0488747
NOTCH2NL|4437|AT	1.9692	6.870*10^0	6.86959	1.009*10^0	1.00908	4.677*10^1	46.7669	4.893*10^-2	0.0489306
NOTCH2NL|4438|AT	-1.9692	1.456*10^-1	0.145569	2.138*10^-2	0.0213827	9.910*10^-1	0.991006	4.893*10^-2	0.0489306
TK2|36722|ES	1.96908	7.176*10^1	71.7606	1.020*10^0	1.01999	5.049*10^3	5048.67	4.894*10^-2	0.0489435
CXorf38|88839|AA	-1.9689	6.563*10^-2	0.0656267	4.360*10^-3	0.00436042	9.877*10^-1	0.987718	4.896*10^-2	0.0489649
CFL1|16924|AD	-1.96822	2.784*10^-1	0.278388	7.792*10^-2	0.077917	9.946*10^-1	0.994648	4.904*10^-2	0.0490423
MMS19|12718|AA	-1.9676	3.345*10^-2	0.0334515	1.134*10^-3	0.00113387	9.869*10^-1	0.986894	4.911*10^-2	0.0491136
TMEM164|89871|AP	1.96725	2.965*10^0	2.96489	1.004*10^0	1.00404	8.755*10^0	8.75523	4.915*10^-2	0.049154
TENC1|21928|AD	-1.96679	4.339*10^-6	4.33907e-06	1.965*10^-11	1.96524e-11	9.580*10^-1	0.958026	4.921*10^-2	0.049207
ZNF544|52430|ES	1.96608	5.812*10^0	5.81197	1.005*10^0	1.00549	3.359*10^1	33.5946	4.929*10^-2	0.0492897
GID4|39539|AT	1.96558	7.552*10^3	7551.75	1.026*10^0	1.02585	5.559*10^7	5.55917e+07	4.935*10^-2	0.0493468
TMX3|45755|AT	1.96507	5.090*10^3	5089.57	1.022*10^0	1.02241	2.534*10^7	2.53359e+07	4.941*10^-2	0.0494065
C20orf196|58657|AT	-1.96471	8.173*10^-2	0.0817329	6.721*10^-3	0.00672081	9.940*10^-1	0.993969	4.945*10^-2	0.0494478
CDV3|66838|AA	1.96465	3.930*10^1	39.2984	1.009*10^0	1.0088	1.531*10^3	1530.9	4.945*10^-2	0.0494547
C20orf196|58656|AT	1.96463	1.223*10^1	12.2338	1.006*10^0	1.00596	1.488*10^2	148.779	4.946*10^-2	0.0494571
AP2S1|50597|AP	1.96427	3.633*10^1	36.3252	1.008*10^0	1.00791	1.309*10^3	1309.17	4.950*10^-2	0.0494986
TBL2|79960|AP	-1.9633	1.490*10^-3	0.00149025	2.246*10^-6	2.24556e-06	9.890*10^-1	0.988989	4.961*10^-2	0.0496109
GPER1|78566|AP	-1.96318	3.335*10^-1	0.333484	1.114*10^-1	0.111412	9.982*10^-1	0.998202	4.963*10^-2	0.0496251
LETMD1|21753|ES	1.96317	1.576*10^1	15.765	1.005*10^0	1.00451	2.474*10^2	247.419	4.963*10^-2	0.049627
EXD3|88298|AT	-1.96308	2.800*10^-1	0.279981	7.855*10^-2	0.0785481	9.980*10^-1	0.99798	4.964*10^-2	0.0496367
AKR1A1|2698|ES	1.96283	1.904*10^1	19.0355	1.004*10^0	1.00432	3.608*10^2	360.792	4.967*10^-2	0.0496655
NPRL3|32806|ES	1.96279	6.587*10^0	6.58653	1.003*10^0	1.00271	4.326*10^1	43.2649	4.967*10^-2	0.049671
PLEKHA5|20651|ES	-1.96158	1.006*10^-7	1.00577e-07	1.025*10^-14	1.02509e-14	9.868*10^-1	0.986807	4.981*10^-2	0.0498113
PREPL|53440|ES	-1.96144	7.006*10^-2	0.0700562	4.918*10^-3	0.00491772	9.980*10^-1	0.997999	4.983*10^-2	0.0498275
VEZT|23782|ES	-1.96118	3.400*10^-2	0.0339983	1.158*10^-3	0.00115831	9.979*10^-1	0.99791	4.986*10^-2	0.0498583
ZNF398|82171|AP	1.96116	3.092*10^0	3.09173	1.001*10^0	1.00069	9.552*10^0	9.55218	4.986*10^-2	0.0498601
GTF2IRD2|80091|AT	-1.96103	1.905*10^-1	0.190465	3.631*10^-2	0.0363095	9.991*10^-1	0.999099	4.988*10^-2	0.0498755
KIAA1191|97008|ES	-1.96062	1.814*10^-1	0.181356	3.291*10^-2	0.0329086	9.994*10^-1	0.999433	4.992*10^-2	0.0499239
DNAH7|56630|AT	1.96022	1.697*10^1	16.9694	1.000*10^0	1.00037	2.879*10^2	287.854	4.997*10^-2	0.0499699
TCTN1|24477|ES	1.95998	5.820*10^0	5.82022	1.000*10^0	1.00001	3.387*10^1	33.8745	5.000*10^-2	0.0499984
